# Supplementary material for: Transcriptome analysis of PK-15 cells in innate immune response to porcine deltacoronavirus infection
Source: PLoS One. 2019 Oct 1;14(10):e0223177. doi: 10.1371/journal.pone.0223177 (PMC6773216; doi:10.1371/journal.pone.0223177)
Supplement: S2 Table — (XLSX) [file pone.0223177.s002.xlsx]

## Sheet: S2
Gene ID	Gene name	Gene description	Log2FoldChange(INF_24/NC)	P-value	FDR(padj)
396752	RSAD2	radical S-adenosyl methionine domain containing 2	7.14937	0	0
100624243	ZNFX1	zinc finger NFX1-type containing 1	3.86369	0	0
100153038	IFIT1	interferon-induced protein with tetratricopeptide repeats 1	6.02588	0	0
novel.14553	-	PF01031:Dynamin central region|PF00350:Dynamin family|PF02212:Dynamin GTPase effector domain	5.6205	0	0
100151938	GBP1	guanylate binding protein 1%2C interferon-inducible%2C transcript variant X1	5.71206	0	0
novel.4690	-	-	7.44526	0	0
100155467	IFIT2	interferon induced protein with tetratricopeptide repeats 2%2C transcript variant X1	7.49465	0	0
novel.17459	-	-	5.52826	0	0
396915	EDN1	endothelin 1	5.58966	3.45016415869505e-318	9.11303359948008e-315
novel.12412	-	-	3.39296	1.83417400061124e-311	4.3602e-308
100516689	C10H1orf115	chromosome 10 C1orf115 homolog	7.36514	3.2634e-296	7.05251e-293
novel.14898	-	PF10421:2'-5'-oligoadenylate synthetase 1, domain 2, C-terminus|PF01909:Nucleotidyltransferase domain	4.43909	5.25445e-280	1.04091e-276
733579	LOC733579	tripartite motif protein TRIM5	3.42519	6.12401e-257	1.11985e-253
397570	OAS1	2'-5'-oligoadenylate synthetase 1	4.86115	6.23209e-248	1.05821e-244
100127358	IFITM1	interferon-induced transmembrane protein 1	5.18222	3.44801e-247	5.46441e-244
novel.8835	-	PF00012:Hsp70 protein	5.24237	1.17405e-246	1.74435e-243
100515875	BATF2	basic leucine zipper ATF-like transcription factor 2%2C transcript variant X1	3.77714	2.82235e-245	3.94665e-242
100522679	PPP1R15A	protein phosphatase 1 regulatory subunit 15A%2C transcript variant X1	3.25649	1.31909e-244	1.74208e-241
100525205	FOSL1	FOS like 1%2C AP-1 transcription factor subunit	3.8597	2.07354e-240	2.59433e-237
100514753	UBE2L6	ubiquitin conjugating enzyme E2 L6	3.5375	4.67287e-235	5.55417e-232
110261124	IFI6	interferon alpha inducible protein 6%2C transcript variant X3	3.12908	3.44771e-232	3.90281e-229
novel.12414	-	-	3.35349	3.31985e-226	3.58725e-223
100153822	NFIL3	nuclear factor%2C interleukin 3 regulated%2C transcript variant X1	3.28314	2.30585e-222	2.38324e-219
100738127	ETV3	ETS variant 3%2C transcript variant X1	3.03395	1.04567e-221	1.03574e-218
novel.8836	-	PF06723:MreB/Mbl protein|PF00012:Hsp70 protein	4.34735	1.98877e-219	1.89108e-216
445459	IFNB1	interferon beta 1	9.41084	2.05452e-218	1.87846e-215
100519098	LOC100519098	sterile alpha motif domain-containing protein 9%2C transcript variant X1	2.71793	1.11273e-207	9.79698e-205
100156549	BCL6	B-cell CLL/lymphoma 6%2C transcript variant X6	2.89764	1.58938e-204	1.34938e-201
110256626	LOC110256626	proline dehydrogenase 1%2C mitochondrial%2C transcript variant X1	4.284	5.15744e-199	4.22768e-196
100625050	EPSTI1	epithelial stromal interaction 1%2C transcript variant X1	4.08134	1.35739e-192	1.0756e-189
396723	DDX58	DExD/H-box helicase 58%2C transcript variant X3	3.95472	2.76737e-186	2.12213e-183
novel.15434	-	-	2.88522	4.5121e-184	3.35192e-181
100153948	PARP14	poly(ADP-ribose) polymerase family member 14%2C transcript variant X2	2.93202	1.60704e-183	1.15766e-180
novel.16979	-	PF13520:Amino acid permease	6.10892	9.47217e-182	6.62272e-179
novel.13029	-	-	7.65249	9.55884e-181	6.49237e-178
396893	MX2	myxovirus (influenza virus) resistance 2 (mouse)	5.56974	8.25735e-178	5.45261e-175
100513970	RALGDS	ral guanine nucleotide dissociation stimulator%2C transcript variant X9	3.08136	1.05095e-176	6.7522e-174
595119	OASL	2'-5'-oligoadenylate synthetase like	6.29982	5.42538e-175	3.39401e-172
396655	STAT1	signal transducer and activator of transcription 1%2C transcript variant X2	2.76014	4.5023e-173	2.74432e-170
100625349	MXD1	MAX dimerization protein 1%2C transcript variant X2	3.06037	3.0702e-172	1.82462e-169
494019	CXCL10	C-X-C motif chemokine ligand 10	7.03875	2.81858e-167	1.63423e-164
novel.8313	-	PF07534:TLD	4.19786	3.72332e-166	2.1074e-163
novel.16057	-	PF04851:Type III restriction enzyme, res subunit|PF16739:Caspase recruitment domain	4.55027	1.7338e-165	9.58508e-163
100624279	ZFP36L1	ZFP36 ring finger protein like 1%2C transcript variant X1	2.40084	1.80507e-164	9.75228e-162
100415778	ZC3HAV1	zinc finger CCCH-type containing%2C antiviral 1%2C transcript variant X3	2.87213	6.69683e-161	3.53771e-158
396923	STAT2	signal transducer and activator of transcription 2	2.74856	1.30175e-160	6.7272e-158
100153946	CEBPD	CCAAT/enhancer binding protein delta	-2.48788	9.47922e-157	4.79447e-154
100511587	CNP	2'%2C3'-cyclic nucleotide 3' phosphodiesterase%2C transcript variant X1	2.71161	1.01148e-156	5.00934e-154
novel.8787	-	PF07654:Immunoglobulin C1-set domain|PF00129:Class I Histocompatibility antigen, domains alpha 1 and 2|PF06623:MHC_I C-terminus	2.71212	4.48474e-154	2.17574e-151
397559	RND3	Rho family GTPase 3	2.46742	5.58024e-153	2.65307e-150
novel.12413	-	-	3.39988	3.1124e-151	1.45075e-148
novel.11540	-	PF02994:L1 transposable element RBD-like domain|PF17489:L1 transposable element trimerization domain	4.51493	1.84469e-150	8.43305e-148
100515805	PARP12	poly(ADP-ribose) polymerase family member 12%2C transcript variant X1	3.22849	2.8149e-149	1.26256e-146
novel.9088	-	-	5.49201	1.21432e-146	5.34573e-144
novel.3918	-	PF15226:HCF-1 beta-propeller-interacting protein family	4.5586	2.0945e-143	9.05282e-141
100525104	REL	REL proto-oncogene%2C NF-kB subunit%2C transcript variant X1	2.59922	1.89877e-142	8.06028e-140
396906	HSPA6	heat shock protein family A (Hsp70) member 6	5.08678	3.41262e-141	1.42324e-138
100518796	SGMS2	sphingomyelin synthase 2%2C transcript variant X4	2.62735	1.38132e-139	5.6615e-137
novel.13682	-	PF00028:Cadherin domain	6.83711	1.62299e-139	6.53927e-137
100337659	EPHB3	EPH receptor B3%2C transcript variant X1	4.97146	3.12309e-137	1.23737e-134
100157336	PML	promyelocytic leukemia	2.93857	5.47123e-133	2.13216e-130
100302363	ETS1	ETS proto-oncogene 1%2C transcription factor%2C transcript variant X1	2.30443	1.63776e-130	6.2795e-128
100157058	FILIP1L	filamin A interacting protein 1 like%2C transcript variant X1	3.11806	3.81111e-130	1.42486e-127
novel.8312	-	-	2.66525	3.83607e-130	1.42486e-127
100511889	ZC3H12C	zinc finger CCCH-type containing 12C%2C transcript variant X4	2.25078	2.77029e-127	1.01316e-124
100513685	PPTC7	PTC7 protein phosphatase homolog	2.41986	6.33498e-127	2.28175e-124
100522238	UNC93B1	unc-93 homolog B1 (C. elegans)%2C transcript variant X1	2.29592	6.85598e-127	2.43254e-124
100515283	GM2A	GM2 ganglioside activator%2C transcript variant X2	2.51814	9.30582e-126	3.2532e-123
novel.10403	-	PF00632:HECT-domain (ubiquitin-transferase)	5.58405	9.78401e-126	3.3708e-123
100310806	IFN-ALPHAOMEGA	interferon-alphaomega	11.6219	4.55485e-125	1.54683e-122
396724	OLR1	oxidized low density lipoprotein receptor 1	6.98899	1.4119e-124	4.72728e-122
100518350	FUNDC1	FUN14 domain containing 1	2.51131	2.25795e-124	7.45501e-122
733649	TAP1	transporter 1%2C ATP binding cassette subfamily B member%2C transcript variant X1	2.8173	2.64441e-124	8.61137e-122
100737576	PPP4R4	protein phosphatase 4 regulatory subunit 4%2C transcript variant X1	3.86501	4.00646e-123	1.28705e-120
novel.5522	-	-	2.69297	3.87481e-122	1.22816e-119
102161784	LOC102161784	guanylate-binding protein 6-like%2C transcript variant X1	4.33908	6.48366e-121	2.02802e-118
100521017	PLAUR	plasminogen activator%2C urokinase receptor	3.11096	1.138e-120	3.51331e-118
novel.1066	-	-	9.95997	2.65917e-120	8.10434e-118
novel.11346	-	PF07714:Protein tyrosine kinase|PF08919:F-actin binding	5.59127	6.74841e-119	2.03067e-116
100307052	SOCS1	suppressor of cytokine signaling 1%2C transcript variant X2	3.95681	3.14832e-118	9.35522e-116
100519390	PARP9	poly(ADP-ribose) polymerase family member 9%2C transcript variant X5	2.16033	9.9176e-114	2.91063e-111
100155195	LOC100155195	guanylate-binding protein 7	5.21022	1.9914e-112	5.77312e-110
399525	GLS	glutaminase%2C transcript variant X1	3.42835	4.48936e-109	1.28579e-106
novel.15324	-	PF01044:Vinculin family	3.8859	9.16115e-109	2.59261e-106
novel.9253	-	PF00643:B-box zinc finger|PF12126:Protein of unknown function (DUF3583)	2.892	3.69388e-108	1.03307e-105
novel.17718	-	-	2.41777	2.23642e-106	6.18187e-104
100620852	PRAG1	PEAK1 related kinase activating pseudokinase 1	2.02217	1.04609e-104	2.85836e-102
novel.6462	-	-	3.89813	2.94164e-104	7.94644e-102
novel.15496	-	-	6.17759	1.07667e-103	2.8758e-101
100624186	GPRC5A	G protein-coupled receptor class C group 5 member A%2C transcript variant X2	2.64581	5.53313e-103	1.46148e-100
novel.2524	-	PF00226:DnaJ domain|PF01556:DnaJ C terminal domain	2.81872	6.05606e-103	1.58203e-100
100622285	TRIM25	tripartite motif containing 25	2.06027	8.4373e-102	2.18012e-99
novel.7846	-	-	3.80132	9.44413e-102	2.41404e-99
733688	TXNIP	thioredoxin interacting protein	2.15169	8.19599e-101	2.07271e-98
novel.3917	-	-	4.71407	1.71408e-100	4.28916e-98
novel.8779	-	PF15227:zinc finger of C3HC4-type, RING|PF13765:SPRY-associated domain|PF00643:B-box zinc finger	2.43688	3.93401e-99	9.7416e-97
novel.16002	-	-	3.67987	4.9566e-99	1.21472e-96
novel.18753	-	-	3.51974	4.04553e-98	9.8133e-96
novel.10764	-	-	3.59265	2.19854e-97	5.27917e-95
100523029	DLX2	distal-less homeobox 2	4.17238	5.46616e-97	1.29942e-94
396975	PSMB8	proteasome subunit beta 8	2.03269	1.11503e-95	2.62441e-93
100524797	NEURL3	neuralized E3 ubiquitin protein ligase 3	3.63269	3.46433e-95	8.07393e-93
100157963	CGN	cingulin%2C transcript variant X3	2.00781	1.38701e-94	3.20117e-92
100520683	PRSS23	protease%2C serine 23%2C transcript variant X3	2.0656	2.0551e-91	4.69749e-89
100515632	KDM7A	lysine demethylase 7A	2.30308	3.70358e-91	8.38491e-89
100510966	TACSTD2	tumor associated calcium signal transducer 2	1.79997	3.94092e-91	8.83808e-89
100623115	PI4K2B	phosphatidylinositol 4-kinase type 2 beta%2C transcript variant X2	2.00276	4.47318e-91	9.93798e-89
100154449	ETS2	ETS proto-oncogene 2%2C transcription factor%2C transcript variant X1	2.25831	1.19366e-90	2.62738e-88
100514374	DUSP4	dual specificity phosphatase 4	1.78208	1.79323e-90	3.91089e-88
novel.15532	-	PF00153:Mitochondrial carrier protein	3.44802	2.71269e-90	5.86237e-88
novel.1541	-	PF00229:TNF(Tumour Necrosis Factor) family	2.76984	2.73784e-89	5.86341e-87
100511825	UGT8	UDP glycosyltransferase 8%2C transcript variant X2	-2.07974	3.01382e-89	6.39684e-87
100217390	TNFRSF12A	TNF receptor superfamily member 12A	1.77052	4.46238e-89	9.38759e-87
733631	GATA3	GATA binding protein 3%2C transcript variant X2	4.58454	1.66244e-87	3.46662e-85
100153902	ISG12(A)	putative ISG12(a) protein	1.97699	2.70704e-87	5.5958e-85
100153821	DDIT4	DNA damage inducible transcript 4	2.21157	4.00559e-86	8.20869e-84
100739200	GUCA1A	guanylate cyclase activator 1A%2C transcript variant X3	6.81692	1.18548e-85	2.40866e-83
100155428	TAPBP	TAP binding protein%2C transcript variant X2	1.8377	2.69629e-85	5.43188e-83
novel.11106	-	-	2.52852	1.38199e-84	2.76072e-82
100158037	DDX60	DExD/H-box helicase 60%2C transcript variant X3	5.80728	2.80332e-84	5.55338e-82
100738234	EHD4	EH domain containing 4	1.7999	3.46111e-84	6.79979e-82
100627201	SLC2A6	solute carrier family 2 member 6	4.22936	3.74977e-84	7.30653e-82
novel.1665	-	PF00153:Mitochondrial carrier protein	1.99152	2.21213e-83	4.27535e-81
100522873	EPHA2	EPH receptor A2	1.70378	2.44894e-82	4.69485e-80
novel.11374	-	PF06479:Ribonuclease 2-5A|PF13857:Ankyrin repeats (many copies)|PF00069:Protein kinase domain|PF13637:Ankyrin repeats (many copies)|PF12796:Ankyrin repeats (3 copies)	2.55609	2.71086e-82	5.1554e-80
100516459	GAS1	growth arrest specific 1	-2.76555	1.5553e-81	2.93432e-79
733626	PSMB10	proteasome subunit beta 10	2.19569	2.04561e-81	3.829e-79
100627052	ARL5B	ADP ribosylation factor like GTPase 5B	2.2493	7.10583e-80	1.31969e-77
novel.10530	-	PF00622:SPRY domain	3.16994	2.15205e-79	3.96578e-77
396840	SOX9	SRY-box 9	2.0272	3.6614e-79	6.6953e-77
novel.2851	-	PF11635:Mediator complex subunit 16	2.48597	1.2283e-78	2.22895e-76
100518964	FAM84A	family with sequence similarity 84 member A	2.00017	3.60521e-78	6.49266e-76
396660	CD74	CD74 molecule%2C transcript variant X3	2.73731	5.97332e-78	1.06765e-75
100515390	WARS	tryptophanyl-tRNA synthetase%2C transcript variant X1	2.24584	7.94027e-77	1.40863e-74
novel.11765	-	PF07690:Major Facilitator Superfamily	2.09847	9.27604e-77	1.63341e-74
novel.5439	-	-	3.49811	1.09586e-76	1.9155e-74
110259297	RRAS2	related RAS viral (r-ras) oncogene homolog 2%2C transcript variant X3	1.73083	1.22422e-76	2.12425e-74
novel.5455	-	-	4.80053	1.75342e-75	3.02046e-73
100521185	ZFAND2A	zinc finger AN1-type containing 2A%2C transcript variant X2	2.0005	4.09787e-75	7.00825e-73
100625215	STK40	serine/threonine kinase 40%2C transcript variant X2	2.07121	8.6201e-75	1.46369e-72
497061	ADAMTS1	ADAM metallopeptidase with thrombospondin type 1 motif 1	-1.59173	9.42265e-75	1.58862e-72
397278	PMAIP1	phorbol-12-myristate-13-acetate-induced protein 1	3.00848	1.89881e-74	3.17876e-72
100523904	PHLDA1	pleckstrin homology like domain family A member 1	3.05911	2.97992e-74	4.95375e-72
397599	B3GNT5	UDP-GlcNAc:betaGal beta-1%2C3-N-acetylglucosaminyltransferase 5%2C transcript variant X6	2.66719	3.03424e-74	5.00903e-72
novel.1797	-	PF04505:Interferon-induced transmembrane protein	4.75554	4.79797e-74	7.86603e-72
553100	GUCY1A3	guanylate cyclase 1 soluble subunit alpha%2C transcript variant X1	-1.70034	1.49437e-73	2.43317e-71
novel.16041	-	PF12906:RING-variant domain	3.9813	7.25437e-73	1.17314e-70
novel.1630	-	PF00616:GTPase-activator protein for Ras-like GTPase	2.87496	1.47293e-72	2.36584e-70
100154896	CASP10	caspase 10%2C transcript variant X1	2.70088	1.6912e-72	2.69821e-70
100518690	GAS7	growth arrest specific 7%2C transcript variant X2	1.67286	3.09116e-72	4.89887e-70
novel.1067	-	-	12.409	3.95733e-72	6.23004e-70
100622289	BSPRY	B-box and SPRY domain containing%2C transcript variant X1	2.42517	4.13977e-72	6.47439e-70
100519275	CSRNP1	cysteine and serine rich nuclear protein 1	2.05549	7.81897e-72	1.21485e-69
110259213	DUSP8	dual specificity phosphatase 8	2.36541	7.99697e-72	1.23444e-69
100523310	LOC100523310	guanylate-binding protein 6%2C transcript variant X1	5.14101	3.13394e-71	4.80646e-69
novel.6029	-	PF05461:Apolipoprotein L	4.57659	4.47409e-71	6.81783e-69
100533202	ARHGAP8	Rho GTPase activating protein 8%2C transcript variant X1	2.96151	1.17576e-70	1.78026e-68
100525921	EPS8	epidermal growth factor receptor pathway substrate 8%2C transcript variant X4	1.59749	4.58876e-70	6.90405e-68
100153843	LIPM	lipase family member M%2C transcript variant X3	4.25984	5.24143e-70	7.83643e-68
100517250	NUB1	negative regulator of ubiquitin like proteins 1%2C transcript variant X1	1.72706	7.93255e-70	1.17858e-67
100187579	LPIN2	lipin 2%2C transcript variant X8	1.58347	1.16956e-69	1.72688e-67
novel.15256	-	PF00632:HECT-domain (ubiquitin-transferase)	6.05182	1.65408e-69	2.42721e-67
397319	CASP1	caspase 1%2C apoptosis-related cysteine peptidase	5.77357	6.65388e-69	9.70405e-67
100517459	ENC1	ectodermal-neural cortex 1%2C transcript variant X1	1.9582	8.19993e-69	1.18859e-66
100153143	BCAR3	breast cancer anti-estrogen resistance 3%2C transcript variant X1	2.58349	1.44973e-68	2.08867e-66
novel.13327	-	-	3.55778	2.05592e-68	2.94418e-66
novel.2772	-	PF13347:MFS/sugar transport protein	2.09394	3.79379e-68	5.40035e-66
100623242	FEM1C	fem-1 homolog C%2C transcript variant X1	5.10094	7.01014e-68	9.91934e-66
novel.7756	-	-	3.07084	3.06021e-67	4.30458e-65
641349	PPP1R3C	protein phosphatase 1 regulatory subunit 3C	2.26972	3.18299e-67	4.45095e-65
100169744	CXCL11	C-X-C motif chemokine ligand 11%2C transcript variant X1	6.77523	3.68772e-67	5.12657e-65
100523398	SPNS2	sphingolipid transporter 2%2C transcript variant X1	2.01423	9.14419e-67	1.26381e-64
110255459	LOC110255459	uncharacterized LOC110255459	7.26043	1.37428e-66	1.88841e-64
106504205	LOC106504205	uncharacterized LOC106504205	5.93101	1.38582e-66	1.89331e-64
110255361	LOC110255361	interferon-induced very large GTPase 1-like%2C transcript variant X4	7.53991	2.11265e-66	2.86982e-64
100155165	PIK3AP1	phosphoinositide-3-kinase adaptor protein 1%2C transcript variant X2	1.49248	4.43134e-66	5.98533e-64
100517077	MKNK2	MAP kinase interacting serine/threonine kinase 2%2C transcript variant X2	1.51013	7.53599e-65	1.01212e-62
100524761	KCTD12	potassium channel tetramerization domain containing 12	-1.66884	1.84263e-64	2.46084e-62
novel.16036	-	PF00514:Armadillo/beta-catenin-like repeat	3.56795	2.4469e-64	3.24959e-62
110261486	LOC110261486	histone H2B type 1-B	3.69327	8.96602e-64	1.18411e-61
novel.16331	-	PF00039:Fibronectin type I domain|PF00041:Fibronectin type III domain	3.0964	9.2422e-63	1.21384e-60
100620966	SESN2	sestrin 2%2C transcript variant X3	3.40584	1.12438e-62	1.46861e-60
novel.15240	-	-	3.15202	1.54e-62	2.00048e-60
novel.14079	-	-	5.11668	2.95061e-62	3.81206e-60
100520876	SNX10	sorting nexin 10%2C transcript variant X1	1.72027	3.95381e-62	5.08054e-60
414407	SCARB2	scavenger receptor class B member 2	1.65327	4.38522e-62	5.60459e-60
100525703	DNAJB4	DnaJ heat shock protein family (Hsp40) member B4%2C transcript variant X2	2.438	5.43628e-62	6.91076e-60
100126164	ANGPTL2	angiopoietin like 2%2C transcript variant X1	-2.06969	1.59097e-61	2.01173e-59
novel.11345	-	-	4.64127	2.45383e-61	3.08638e-59
novel.11081	-	-	2.02081	3.193e-61	3.99494e-59
novel.1873	-	-	3.98449	5.81945e-61	7.24293e-59
733670	RGS2	regulator of G protein signaling 2	3.61573	1.1078e-60	1.37159e-58
102160087	LBH	limb bud and heart development%2C transcript variant X3	1.52693	1.83324e-60	2.25803e-58
100521780	MAFK	MAF bZIP transcription factor K%2C transcript variant X1	1.56294	3.45543e-60	4.23415e-58
100623148	SLC7A11	solute carrier family 7 member 11	2.17381	4.93586e-60	6.01719e-58
novel.14227	-	PF13695:Zinc-binding domain	3.59222	5.34539e-60	6.4832e-58
110261555	SEMA4B	semaphorin 4B%2C transcript variant X1	1.68135	6.05203e-60	7.30299e-58
novel.8889	-	PF00071:Ras family	2.49275	7.66521e-59	9.2029e-57
novel.16560	-	PF01049:Cadherin cytoplasmic region|PF00028:Cadherin domain	-1.68672	8.1152e-59	9.6942e-57
414916	PRLR	prolactin receptor	-2.66634	8.63265e-59	1.02608e-56
novel.3227	-	PF03465:eRF1 domain 3|PF03464:eRF1 domain 2	3.59229	9.9938e-59	1.18195e-56
novel.2467	-	PF16716:Bone marrow stromal antigen 2	3.42903	1.21203e-58	1.42635e-56
100524832	SGPP2	sphingosine-1-phosphate phosphatase 2%2C transcript variant X2	1.89914	4.16442e-58	4.87668e-56
100523536	NFIX	nuclear factor I X%2C transcript variant X8	2.95083	6.22695e-58	7.25623e-56
100520131	OSR1	odd-skipped related transciption factor 1%2C transcript variant X7	3.16787	1.21091e-57	1.40419e-55
100521440	ORAI2	ORAI calcium release-activated calcium modulator 2%2C transcript variant X3	1.49682	2.25371e-57	2.60074e-55
novel.16767	-	-	2.96815	2.89076e-57	3.31977e-55
100147710	MEST	mesoderm specific transcript%2C transcript variant X5	1.7615	3.05655e-57	3.49329e-55
100312970	ELOVL6	ELOVL fatty acid elongase 6%2C transcript variant X3	-1.91382	5.47577e-57	6.22822e-55
445464	C1R	complement C1r	1.64053	1.16056e-56	1.31376e-54
100155201	PPA1	pyrophosphatase (inorganic) 1	1.47754	1.57046e-56	1.76933e-54
novel.10239	-	-	3.49009	1.79045e-56	2.00767e-54
novel.12007	-	PF00012:Hsp70 protein	3.63713	2.69991e-56	3.01325e-54
novel.9898	-	PF00566:Rab-GTPase-TBC domain|PF00640:Phosphotyrosine interaction domain (PTB/PID)|PF11830:Domain of unknown function (DUF3350)	3.09347	2.78642e-56	3.09527e-54
novel.17189	-	PF11566:PI31 proteasome regulator N-terminal	1.88386	2.88579e-56	3.19075e-54
novel.4830	-	PF07159:Protein of unknown function (DUF1394)	4.60933	3.03599e-56	3.34127e-54
novel.16994	-	PF01231:Indoleamine 2,3-dioxygenase	4.90056	4.95045e-56	5.42314e-54
100522824	GNA13	G protein subunit alpha 13	1.56675	1.74397e-55	1.90173e-53
494011	SLC27A2	solute carrier family 27 member 2	-2.20895	2.17483e-55	2.36073e-53
100620055	PLSCR1	phospholipid scramblase 1%2C transcript variant X1	1.75089	2.32675e-55	2.50636e-53
110255360	LOC110255360	interferon-induced very large GTPase 1-like%2C transcript variant X4	4.89104	2.33008e-55	2.50636e-53
100157209	PRICKLE1	prickle planar cell polarity protein 1%2C transcript variant X4	1.98559	2.70374e-55	2.8952e-53
110260763	GXYLT1	glucoside xylosyltransferase 1%2C transcript variant X4	-1.57584	3.00319e-55	3.20143e-53
100519699	CTNND1	catenin delta 1%2C transcript variant X19	2.22092	4.63068e-55	4.91431e-53
595123	NAMPT	nicotinamide phosphoribosyltransferase%2C transcript variant X1	1.758	5.07688e-55	5.36389e-53
novel.16424	-	PF03172:HSR domain	2.08099	6.73188e-55	7.08099e-53
100152652	TDRD7	tudor domain containing 7%2C transcript variant X2	2.89462	7.87932e-55	8.25141e-53
100513583	PRRG4	proline rich and Gla domain 4%2C transcript variant X1	1.84319	9.11066e-55	9.49907e-53
100152141	CTGF	connective tissue growth factor	1.4916	1.11024e-54	1.15252e-52
novel.2328	-	PF00090:Thrombospondin type 1 domain	3.16579	1.28817e-54	1.33141e-52
100517284	ACTN4	actinin alpha 4%2C transcript variant X3	1.49054	3.21128e-54	3.3047e-52
novel.16807	-	PF12937:F-box-like|PF12125:D domain of beta-TrCP|PF00400:WD domain, G-beta repeat	4.88698	5.59352e-54	5.73142e-52
novel.17051	-	-	3.05657	7.30515e-54	7.45314e-52
106508422	LOC106508422	uncharacterized LOC106508422	3.83335	7.66802e-54	7.78993e-52
100152434	PRPH	peripherin%2C transcript variant X1	6.40463	1.27479e-53	1.28954e-51
novel.7511	-	PF13671:AAA domain|PF08645:Polynucleotide kinase 3 phosphatase	2.16725	4.17723e-53	4.20767e-51
102162017	EFCAB8	EF-hand calcium binding domain 8%2C transcript variant X1	3.13375	5.6341e-53	5.65122e-51
100049656	CNN3	calponin 3	1.27631	2.79831e-52	2.79502e-50
106504168	FBXO39	F-box protein 39%2C transcript variant X4	4.6067	4.97233e-52	4.9457e-50
novel.75	-	PF00081:Iron/manganese superoxide dismutases, alpha-hairpin domain|PF02777:Iron/manganese superoxide dismutases, C-terminal domain	-2.16615	5.31439e-52	5.26391e-50
novel.5750	-	-	3.06023	8.81147e-52	8.69155e-50
100523705	TMEM140	transmembrane protein 140	2.19236	9.74164e-52	9.56935e-50
novel.17433	-	PF00595:PDZ domain (Also known as DHR or GLGF)	1.63366	1.2955e-51	1.26735e-49
100152368	EGLN3	egl-9 family hypoxia inducible factor 3	-1.8606	1.37603e-51	1.34061e-49
novel.7985	-	PF02755:RPEL repeat	5.00604	2.14181e-51	2.07817e-49
100627656	FAM76A	family with sequence similarity 76 member A%2C transcript variant X1	1.72408	2.17275e-51	2.09962e-49
100515635	CREB5	cAMP responsive element binding protein 5%2C transcript variant X4	2.65672	2.23754e-51	2.15347e-49
novel.17786	-	PF00102:Protein-tyrosine phosphatase	2.59906	2.30733e-51	2.21168e-49
100523640	GP5	glycoprotein V platelet	9.97053	2.53577e-51	2.4209e-49
100518810	TRIB3	tribbles pseudokinase 3	1.87521	3.01924e-51	2.87094e-49
100154650	PANK1	pantothenate kinase 1%2C transcript variant X6	-2.63523	3.54011e-51	3.35281e-49
novel.9526	-	-	3.17989	5.79655e-51	5.46808e-49
100101477	EMP1	epithelial membrane protein 1%2C transcript variant X1	1.54731	5.84118e-51	5.4884e-49
novel.1917	-	-	3.74428	5.93953e-51	5.55884e-49
100518148	HEATR9	HEAT repeat containing 9	6.94151	7.2577e-51	6.76588e-49
100152595	AKAP12	A-kinase anchoring protein 12	-1.54296	1.42313e-50	1.32151e-48
100738625	NKX3-1	NK3 homeobox 1	3.80571	1.6683e-50	1.54315e-48
novel.6223	-	-	4.19421	2.19864e-50	2.02581e-48
100628197	DHCR24	24-dehydrocholesterol reductase	-1.62757	2.27543e-50	2.08847e-48
100379631	PHLDA2	pleckstrin homology like domain family A member 2	1.78913	2.38697e-50	2.18243e-48
novel.13025	-	-	9.98102	2.70053e-50	2.45966e-48
100627339	TTC9	tetratricopeptide repeat domain 9	1.86581	3.56966e-50	3.23885e-48
100624156	CD99	CD99 molecule (Xg blood group)%2C transcript variant X3	1.42248	3.81406e-50	3.44745e-48
novel.10346	-	-	3.74906	4.08128e-50	3.675e-48
novel.5824	-	PF00007:Cystine-knot domain	1.84897	4.1343e-50	3.7087e-48
100156777	CASP7	caspase 7%2C transcript variant X5	1.45124	4.20201e-50	3.75527e-48
novel.2147	-	PF00514:Armadillo/beta-catenin-like repeat	4.80859	5.37405e-50	4.78471e-48
100628052	C17H8orf4	chromosome 17 C8orf4 homolog	1.78408	7.24501e-50	6.42643e-48
novel.15469	-	-	2.39643	7.85647e-50	6.9429e-48
novel.3154	-	-	2.90106	1.58562e-49	1.39605e-47
100156073	LOC100156073	myeloid cell nuclear differentiation antigen-like protein	6.72321	1.79175e-49	1.57172e-47
100037289	IRF7	interferon regulatory factor 7%2C transcript variant X1	3.88972	3.77626e-49	3.30034e-47
404772	GEM	GTP binding protein overexpressed in skeletal muscle%2C transcript variant X2	1.61385	1.04745e-48	9.12089e-47
novel.12241	-	-	2.83991	1.49683e-48	1.29864e-46
100620392	DAG1	dystroglycan 1%2C transcript variant X1	-1.27446	1.51549e-48	1.31005e-46
novel.11129	-	-	3.10909	1.65824e-48	1.42825e-46
100624503	SLC6A9	solute carrier family 6 member 9%2C transcript variant X3	1.7563	2.27385e-48	1.95141e-46
novel.3215	-	-	5.01826	3.98173e-48	3.40481e-46
novel.17828	-	PF16018:Anillin N-terminus	3.44573	5.6159e-48	4.78499e-46
100620702	TRHDE	thyrotropin releasing hormone degrading enzyme	7.44708	5.98971e-48	5.08527e-46
novel.14428	-	-	5.01774	6.53286e-48	5.52666e-46
100156717	HS6ST1	heparan sulfate 6-O-sulfotransferase 1	-1.23587	7.28523e-48	6.1413e-46
100512869	RHBDD1	rhomboid domain containing 1%2C transcript variant X5	1.52608	8.52147e-48	7.15804e-46
novel.16760	-	-	2.50182	1.12235e-47	9.39451e-46
100154512	TRIM38	tripartite motif containing 38%2C transcript variant X1	1.84121	1.17976e-47	9.84045e-46
733625	SFN	stratifin	1.55214	3.12781e-47	2.5998e-45
novel.4444	-	PF11413:Hypoxia-inducible factor-1|PF08447:PAS fold|PF08778:HIF-1 alpha C terminal transactivation domain	-1.9466	3.45394e-47	2.86087e-45
102166455	FAM126B	family with sequence similarity 126 member B%2C transcript variant X15	1.72	4.67169e-47	3.85609e-45
396613	CCL5	C-C motif chemokine ligand 5	9.71919	6.25226e-47	5.14287e-45
novel.16142	-	PF00076:RNA recognition motif. (a.k.a. RRM, RBD, or RNP domain)	3.11784	7.12416e-47	5.83985e-45
100737911	ZNF628	zinc finger protein 628	1.40235	9.21169e-47	7.52509e-45
novel.10322	-	-	3.13589	9.42104e-47	7.66976e-45
100522681	PLEKHM2	pleckstrin homology and RUN domain containing M2%2C transcript variant X1	1.2761	1.08953e-46	8.8397e-45
397623	SIGLEC1	sialic acid binding Ig like lectin 1%2C transcript variant X1	2.68295	1.38086e-46	1.11653e-44
100623414	SRGAP1	SLIT-ROBO Rho GTPase activating protein 1%2C transcript variant X1	1.52131	3.0567e-46	2.46318e-44
novel.5747	-	PF00017:SH2 domain	2.19337	4.26521e-46	3.42542e-44
novel.7659	-	PF01390:SEA domain|PF07648:Kazal-type serine protease inhibitor domain|PF00054:Laminin G domain	3.04591	4.84032e-46	3.87421e-44
100157651	PDE12	phosphodiesterase 12	1.45052	5.26955e-46	4.20362e-44
100192445	PDPK1	3-phosphoinositide dependent protein kinase 1	1.29174	5.71471e-46	4.54348e-44
100511239	SETX	senataxin%2C transcript variant X6	2.66744	1.08322e-45	8.56931e-44
106504950	FAM237A	family with sequence similarity 237 member A%2C transcript variant X6	1.62739	1.08504e-45	8.56931e-44
100156113	STOML1	stomatin like 1%2C transcript variant X3	1.69001	1.27492e-45	1.00356e-43
novel.5174	-	-	3.67603	1.40096e-45	1.09913e-43
novel.8567	-	PF00250:Forkhead domain	2.45149	1.50274e-45	1.17467e-43
780440	YWHAZ	tyrosine 3-monooxygenase/tryptophan 5-monooxygenase activation protein zeta%2C transcript variant X1	2.30252	1.50713e-45	1.17467e-43
397411	MMP7	matrix metallopeptidase 7	-1.92359	1.55079e-45	1.20475e-43
novel.13456	-	-	4.17458	1.61249e-45	1.2486e-43
novel.14064	-	-	2.22255	1.66933e-45	1.28842e-43
100522952	ADAMTS5	ADAM metallopeptidase with thrombospondin type 1 motif 5%2C transcript variant X3	-3.49273	2.23242e-45	1.71745e-43
novel.1186	-	PF17490:L1 transposable element dsRBD-like domain|PF02994:L1 transposable element RBD-like domain|PF17489:L1 transposable element trimerization domain	3.72091	2.44515e-45	1.87504e-43
100512793	LOC100512793	cholesterol 24-hydroxylase	-1.91618	2.48555e-45	1.89989e-43
100517625	FAM120C	family with sequence similarity 120C	-1.64883	3.33421e-45	2.54041e-43
100642182	PNPT1	polyribonucleotide nucleotidyltransferase 1%2C transcript variant X1	1.41125	3.93203e-45	2.98633e-43
novel.12540	-	-	2.95075	4.26445e-45	3.22849e-43
100525346	LOC100525346	poliovirus receptor homolog%2C transcript variant X1	1.61609	5.90325e-45	4.45499e-43
novel.4920	-	PF01476:LysM domain	1.8459	8.71704e-45	6.55764e-43
novel.5154	-	PF00459:Inositol monophosphatase family	-1.30502	1.50114e-44	1.12571e-42
100522963	KIAA0895	KIAA0895 ortholog%2C transcript variant X9	1.60867	2.64556e-44	1.97768e-42
100620756	LRRN4CL	LRRN4 C-terminal like	2.04637	4.15051e-44	3.09298e-42
novel.11867	-	-	5.76999	6.39427e-44	4.75014e-42
novel.14658	-	PF00020:TNFR/NGFR cysteine-rich region|PF00531:Death domain	1.93152	6.47342e-44	4.79396e-42
100157666	SH3RF1	SH3 domain containing ring finger 1%2C transcript variant X1	1.38578	7.4768e-44	5.51983e-42
503545	SLC7A1	solute carrier family 7 member 1	1.38979	1.10684e-43	8.14608e-42
novel.10499	-	-	5.74354	1.28691e-43	9.44212e-42
novel.17719	-	-	2.79017	1.32681e-43	9.70491e-42
397011	OPTN	optineurin%2C transcript variant X1	1.25184	2.41387e-43	1.7602e-41
100511584	CBX4	chromobox 4	1.46389	3.69146e-43	2.68359e-41
100522940	OAF	out at first homolog	1.79265	6.11669e-43	4.43311e-41
100511267	IFI44L	interferon-induced protein 44-like%2C transcript variant X2	4.21442	9.57375e-43	6.91754e-41
100519332	GOSR2	golgi SNAP receptor complex member 2%2C transcript variant X1	2.06723	1.01304e-42	7.29757e-41
100525580	CEBPG	CCAAT/enhancer binding protein gamma%2C transcript variant X8	1.6549	1.04238e-42	7.48624e-41
novel.1436	-	-	5.02114	1.12108e-42	8.02721e-41
100151834	TRIM14	tripartite motif containing 14%2C transcript variant X1	1.66744	1.2018e-42	8.57932e-41
100521680	LOC100521680	histone H3.3	1.14604	1.42513e-42	1.01432e-40
100144591	CYBRD1	cytochrome b reductase 1%2C transcript variant X1	-2.09148	1.7912e-42	1.27106e-40
102723301	LOC102723301	RNA%2C 7SL%2C cytoplasmic 1	8.57725	1.95551e-42	1.38353e-40
novel.13630	-	PF01198:Ribosomal protein L31e	3.59893	2.579e-42	1.81923e-40
novel.4832	-	-	2.59724	2.77616e-42	1.95251e-40
novel.10091	-	-	-2.06896	3.26477e-42	2.28938e-40
novel.18012	-	PF00397:WW domain	1.87805	3.92747e-42	2.746e-40
novel.5393	-	PF02137:Adenosine-deaminase (editase) domain	2.98955	5.33339e-42	3.71805e-40
100522657	AEN	apoptosis enhancing nuclease	1.27686	5.70385e-42	3.96468e-40
novel.15631	-	PF00581:Rhodanese-like domain	1.9969	5.83033e-42	4.04078e-40
100233179	DOK1	docking protein 1	1.71919	6.2821e-42	4.34122e-40
494562	KLF9	Kruppel like factor 9	-1.98152	8.3071e-42	5.72395e-40
novel.9588	-	PF00170:bZIP transcription factor	-1.89147	1.10536e-41	7.59437e-40
novel.18140	-	PF00443:Ubiquitin carboxyl-terminal hydrolase	3.92382	1.26293e-41	8.65196e-40
novel.12278	-	-	6.4523	1.58972e-41	1.08594e-39
novel.17135	-	-	4.18976	1.76675e-41	1.20341e-39
novel.17338	-	-	2.17487	1.9397e-41	1.31744e-39
100515172	HOXD8	homeobox D8%2C transcript variant X3	-1.24478	2.02276e-41	1.36995e-39
novel.713	-	-	1.39169	2.21125e-41	1.49335e-39
100517403	BBC3	BCL2 binding component 3%2C transcript variant X2	2.65296	2.56065e-41	1.72441e-39
novel.2145	-	-	2.66391	2.94376e-41	1.97681e-39
100514648	WFDC1	WAP four-disulfide core domain 1%2C transcript variant X1	1.36982	3.17882e-41	2.12865e-39
novel.12881	-	-	2.33965	3.40689e-41	2.27496e-39
novel.7122	-	PF11977:Zc3h12a-like Ribonuclease NYN domain	2.48209	1.01775e-40	6.777e-39
100155338	HSPB8	heat shock protein family B (small) member 8	1.17462	1.22382e-40	8.12647e-39
100522260	PPP1R3G	protein phosphatase 1 regulatory subunit 3G	-1.70727	1.532e-40	1.01445e-38
100737399	TNFRSF8	TNF receptor superfamily member 8%2C transcript variant X2	-1.52048	1.55505e-40	1.02685e-38
novel.1292	-	PF07714:Protein tyrosine kinase	3.21443	1.87079e-40	1.23192e-38
100620381	DPPA2	developmental pluripotency associated 2	2.90279	2.23733e-40	1.46922e-38
100524733	PRELID2	PRELI domain containing 2%2C transcript variant X2	-1.74277	2.28932e-40	1.49922e-38
100520046	FBXO28	F-box protein 28	1.47914	2.95496e-40	1.92981e-38
novel.17356	-	-	1.11874	3.52223e-40	2.29398e-38
100157451	TP53INP1	tumor protein p53 inducible nuclear protein 1%2C transcript variant X1	-1.40218	7.06186e-40	4.58673e-38
397590	PTGS2	prostaglandin-endoperoxide synthase 2	2.15375	7.59702e-40	4.92088e-38
100156660	TLN2	talin 2%2C transcript variant X5	-1.64272	8.42847e-40	5.44461e-38
100158241	SLC16A7	solute carrier family 16 member 7%2C transcript variant X1	-1.90966	1.1282e-39	7.26819e-38
100523327	WDR26	WD repeat domain 26%2C transcript variant X2	1.20819	1.19973e-39	7.70807e-38
novel.11992	-	PF07714:Protein tyrosine kinase|PF13927:Immunoglobulin domain|PF00047:Immunoglobulin domain|PF07679:Immunoglobulin I-set domain	1.75142	1.39992e-39	8.97005e-38
100624989	SERTAD1	SERTA domain containing 1	1.41185	1.49061e-39	9.52546e-38
novel.5256	-	PF13895:Immunoglobulin domain	9.70803	1.66766e-39	1.06283e-37
novel.16611	-	-	2.97729	1.68532e-39	1.07121e-37
novel.16588	-	-	-2.43834	1.69231e-39	1.07279e-37
102162899	SYS1	SYS1%2C golgi trafficking protein	1.2777	1.95707e-39	1.23733e-37
novel.6053	-	PF05794:T-complex protein 11	6.38239	1.98279e-39	1.25026e-37
novel.2771	-	-	2.30625	2.11437e-39	1.3297e-37
100511223	RTN4RL1	reticulon 4 receptor like 1%2C transcript variant X2	-1.42138	2.18304e-39	1.36927e-37
novel.1510	-	PF13506:Glycosyl transferase family 21	3.26548	2.24474e-39	1.40426e-37
novel.8317	-	PF01556:DnaJ C terminal domain	4.59509	2.4707e-39	1.54156e-37
novel.204	-	PF15440:THRAP3/BCLAF1 family	4.90066	2.88966e-39	1.79825e-37
493185	IFRD1	interferon related developmental regulator 1%2C transcript variant X1	1.3689	4.00702e-39	2.48707e-37
100511327	KIAA1551	KIAA1551 ortholog%2C transcript variant X2	-1.77413	6.13374e-39	3.79717e-37
110262227	FZD1	frizzled class receptor 1	-1.35549	9.02557e-39	5.57288e-37
396807	MYL6	myosin light chain 6%2C transcript variant X1	1.64165	1.00553e-38	6.19259e-37
100621483	CORO1A	coronin 1A%2C transcript variant X1	3.90495	1.02928e-38	6.32249e-37
110255649	LOC110255649	uncharacterized LOC110255649%2C transcript variant X4	3.38568	1.15856e-38	7.0983e-37
novel.16974	-	PF01529:DHHC palmitoyltransferase	3.46481	2.44499e-38	1.49415e-36
100738623	C8H4orf19	chromosome 8 C4orf19 homolog%2C transcript variant X2	1.54563	3.24866e-38	1.98018e-36
novel.12976	-	-	3.80415	3.88502e-38	2.36201e-36
100153026	ABCB10	ATP binding cassette subfamily B member 10	-1.92672	4.62709e-38	2.806e-36
100523320	SOWAHB	sosondowah ankyrin repeat domain family member B	2.18448	6.68775e-38	4.04532e-36
100125376	TES	testin LIM domain protein	1.28446	7.89942e-38	4.76612e-36
novel.18876	-	-	2.03259	7.99818e-38	4.81349e-36
novel.17339	-	-	2.73794	9.58966e-38	5.7567e-36
100151975	R3HCC1L	R3H domain and coiled-coil containing 1 like%2C transcript variant X4	1.71535	1.0787e-37	6.45919e-36
novel.13546	-	-	4.86546	1.12799e-37	6.73735e-36
novel.16203	-	PF04960:Glutaminase	1.71018	1.29828e-37	7.735e-36
408053	HAS3	hyaluronan synthase 3%2C transcript variant X3	2.35653	1.40079e-37	8.32489e-36
100154922	SH2B3	SH2B adaptor protein 3%2C transcript variant X3	1.82673	1.45249e-37	8.61061e-36
novel.11067	-	-	2.39046	1.5408e-37	9.11142e-36
492313	THBS1	thrombospondin 1	1.11389	1.59608e-37	9.41491e-36
100517416	DUSP10	dual specificity phosphatase 10%2C transcript variant X1	1.9629	1.92418e-37	1.13222e-35
novel.8191	-	-	3.22976	1.99838e-37	1.17297e-35
100737004	COBLL1	cordon-bleu WH2 repeat protein like 1%2C transcript variant X10	1.67791	2.13457e-37	1.24983e-35
novel.10264	-	PF00201:UDP-glucoronosyl and UDP-glucosyl transferase	-1.96718	2.15836e-37	1.26065e-35
novel.11770	-	-	3.9234	2.6204e-37	1.52677e-35
novel.10681	-	-	4.41909	3.04424e-37	1.76938e-35
110259392	PRR7	proline rich 7%2C synaptic%2C transcript variant X1	2.58581	5.77465e-37	3.34817e-35
594852	BID	BH3 interacting domain death agonist%2C transcript variant X1	1.21657	8.38055e-37	4.84726e-35
novel.868	-	-	-1.43602	9.1593e-37	5.28483e-35
100523927	EIF4EBP2	eukaryotic translation initiation factor 4E binding protein 2%2C transcript variant X2	-1.1885	9.23214e-37	5.31396e-35
110257248	LOC110257248	collagen alpha-2(I) chain-like	3.64367	1.15461e-36	6.6298e-35
novel.6690	-	-	2.49413	1.2922e-36	7.40194e-35
novel.10739	-	-	3.60897	1.43405e-36	8.19475e-35
novel.15449	-	PF12906:RING-variant domain	3.21294	2.09199e-36	1.19258e-34
novel.10338	-	PF12851:Oxygenase domain of the 2OGFeDO superfamily	7.17665	2.88311e-36	1.63965e-34
100157179	ZNF618	zinc finger protein 618	1.94205	2.95131e-36	1.67443e-34
novel.9681	-	-	3.21381	4.56988e-36	2.58655e-34
novel.9983	-	-	3.03777	4.81455e-36	2.71856e-34
novel.5033	-	PF08599:DNA damage repair protein Nbs1	4.55957	5.20305e-36	2.93097e-34
110257572	LOC110257572	uncharacterized LOC110257572%2C transcript variant X3	1.98098	6.40884e-36	3.60168e-34
100623734	SENP7	SUMO1/sentrin specific peptidase 7%2C transcript variant X1	1.68075	6.83797e-36	3.83378e-34
novel.12631	-	-	4.2845	1.23972e-35	6.93426e-34
102162997	ELL	elongation factor for RNA polymerase II%2C transcript variant X1	1.22706	2.50808e-35	1.39958e-33
novel.8419	-	-	3.45984	2.80648e-35	1.56243e-33
397572	PSME1	proteasome activator subunit 1	1.13843	3.33191e-35	1.85061e-33
novel.14351	-	PF00665:Integrase core domain	-1.16775	3.43199e-35	1.90175e-33
595111	KLF4	Kruppel like factor 4	3.29438	4.37129e-35	2.41661e-33
100520726	EGR1	early growth response 1	-1.16935	5.41853e-35	2.98862e-33
396972	LGALS9	galectin 9%2C transcript variant 1	4.96754	6.63238e-35	3.64965e-33
100625391	PTP4A2	protein tyrosine phosphatase type IVA%2C member 2%2C transcript variant X1	1.11008	6.97726e-35	3.83056e-33
100627056	WNT5A	Wnt family member 5A%2C transcript variant X2	-1.93575	1.14844e-34	6.2905e-33
100737517	SLC40A1	solute carrier family 40 member 1%2C transcript variant X1	-2.2312	1.30687e-34	7.14181e-33
novel.16196	-	-	2.69117	1.39705e-34	7.61713e-33
100520981	NFKBIZ	NFKB inhibitor zeta%2C transcript variant X1	-1.81109	2.11774e-34	1.15201e-32
100515534	USP42	ubiquitin specific peptidase 42%2C transcript variant X3	1.33134	2.12961e-34	1.15582e-32
100626292	MST1R	macrophage stimulating 1 receptor%2C transcript variant X20	1.20672	3.2809e-34	1.77662e-32
397072	C3	complement C3%2C transcript variant X1	-1.48478	4.12016e-34	2.22601e-32
100154208	ROR2	receptor tyrosine kinase like orphan receptor 2%2C transcript variant X1	1.85682	4.18909e-34	2.25812e-32
100038026	TNFSF13B	TNF superfamily member 13b%2C transcript variant X3	4.22082	4.22191e-34	2.27066e-32
novel.2330	-	-	4.84903	5.2152e-34	2.79855e-32
novel.18612	-	PF09337:His(2)-Cys(2) zinc finger|PF00665:Integrase core domain	-1.23568	5.76452e-34	3.08635e-32
100037306	TNFRSF1B	TNF receptor superfamily member 1B%2C transcript variant X1	1.11666	6.04486e-34	3.22918e-32
100155146	S100A16	S100 calcium binding protein A16%2C transcript variant 1	1.16634	6.21079e-34	3.31038e-32
106509733	LOC106509733	uncharacterized LOC106509733%2C transcript variant X8	1.22181	8.27861e-34	4.40266e-32
100518487	TMCC3	transmembrane and coiled-coil domain family 3%2C transcript variant X3	2.53188	8.59704e-34	4.56181e-32
100628119	NDFIP1	Nedd4 family interacting protein 1	-1.21847	9.36994e-34	4.96085e-32
100515836	SPRED3	sprouty related EVH1 domain containing 3%2C transcript variant X3	1.79816	1.14817e-33	6.06541e-32
novel.4097	-	-	1.68635	1.35292e-33	7.13116e-32
novel.13683	-	PF15342:FAM212 family	7.61165	1.38972e-33	7.30893e-32
100154575	RNF182	ring finger protein 182%2C transcript variant X3	2.3376	1.51769e-33	7.96437e-32
100157726	ETV6	ETS variant 6%2C transcript variant X2	1.2271	1.87595e-33	9.82269e-32
100522273	FAM20A	FAM20A%2C golgi associated secretory pathway pseudokinase%2C transcript variant X2	1.07002	1.92235e-33	1.00348e-31
novel.10676	-	-	6.32359	1.92489e-33	1.00348e-31
397250	PLK3	polo like kinase 3	1.28308	1.93979e-33	1.00903e-31
100157985	RNASET2	ribonuclease T2	1.25978	2.51951e-33	1.30772e-31
102162205	LOC102162205	uncharacterized LOC102162205%2C transcript variant X2	2.83298	2.58237e-33	1.33743e-31
733603	SAA3	serum amyloid A-3 protein%2C transcript variant X1	-2.4099	2.80765e-33	1.45094e-31
100144501	EFNA1	ephrin A1	-1.30513	3.49343e-33	1.80143e-31
novel.13629	-	PF00418:Tau and MAP protein, tubulin-binding repeat	2.20532	3.77479e-33	1.9423e-31
100736875	BCL7A	BCL tumor suppressor 7A%2C transcript variant X2	-1.77243	3.86581e-33	1.98484e-31
733669	GADD45A	growth arrest and DNA damage inducible alpha	1.009	3.89304e-33	1.99451e-31
novel.16459	-	PF00130:Phorbol esters/diacylglycerol binding domain (C1 domain)|PF00169:PH domain|PF00781:Diacylglycerol kinase catalytic domain|PF00609:Diacylglycerol kinase accessory domain	2.01766	4.6695e-33	2.38717e-31
808510	ND4	-	-1.05938	5.40979e-33	2.75969e-31
novel.494	-	-	2.22127	5.50447e-33	2.80198e-31
novel.15660	-	-	4.57623	6.64855e-33	3.37712e-31
100622968	DUSP6	dual specificity phosphatase 6	1.2939	7.64842e-33	3.87672e-31
110255183	HOXD9	homeobox D9	-1.36227	8.80152e-33	4.4517e-31
novel.3189	-	PF00025:ADP-ribosylation factor family	3.87061	9.77781e-33	4.93499e-31
novel.15259	-	PF00076:RNA recognition motif. (a.k.a. RRM, RBD, or RNP domain)	2.3552	9.81524e-33	4.94339e-31
novel.4987	-	-	3.47651	1.07797e-32	5.41764e-31
100157838	STN1	STN1%2C CST complex subunit%2C transcript variant X5	2.30712	1.17122e-32	5.86487e-31
100513048	KLHL24	kelch like family member 24%2C transcript variant X1	-1.65405	1.17189e-32	5.86487e-31
102164386	HCAR2	hydroxycarboxylic acid receptor 2	1.7518	1.57883e-32	7.87933e-31
100625104	GIPC2	GIPC PDZ domain containing family member 2%2C transcript variant X1	1.48901	1.58104e-32	7.87933e-31
novel.9993	-	-	-1.4822	1.83449e-32	9.12334e-31
100517010	CAVIN2	caveolae associated protein 2	1.33456	2.07074e-32	1.02767e-30
novel.17753	-	-	2.28372	2.17434e-32	1.07684e-30
100145888	SMAP2	small ArfGAP2%2C transcript variant X2	4.88156	2.43185e-32	1.20187e-30
100302364	MSX1	msh homeobox 1	1.90729	2.83151e-32	1.39649e-30
novel.16048	-	PF00076:RNA recognition motif. (a.k.a. RRM, RBD, or RNP domain)	1.56755	2.86705e-32	1.41109e-30
novel.8403	-	PF00249:Myb-like DNA-binding domain|PF04433:SWIRM domain	3.21513	3.04412e-32	1.49514e-30
100622416	KLHDC7A	kelch domain containing 7A	-1.90521	3.85746e-32	1.89071e-30
novel.11443	-	-	2.3633	4.21622e-32	2.06231e-30
106509958	MTSS1	MTSS1%2C I-BAR domain containing%2C transcript variant X3	1.69133	5.38516e-32	2.62866e-30
493186	SOCS3	suppressor of cytokine signaling 3%2C transcript variant X1	-1.4067	7.53086e-32	3.66851e-30
808509	ND4L	-	-1.09142	8.03774e-32	3.90742e-30
novel.953	-	PF00122:E1-E2 ATPase|PF16209:Phospholipid-translocating ATPase N-terminal|PF13246:Cation transport ATPase (P-type)	2.10784	9.24728e-32	4.48625e-30
397528	SDC4	syndecan 4	1.03389	1.20453e-31	5.81993e-30
100511294	PTPRZ1	protein tyrosine phosphatase%2C receptor type Z1%2C transcript variant X3	1.61008	1.30021e-31	6.26951e-30
100627254	ERC2	ELKS/RAB6-interacting/CAST family member 2%2C transcript variant X20	2.53894	1.54708e-31	7.44478e-30
100522469	DUSP1	dual specificity phosphatase 1%2C transcript variant X1	1.21441	1.67477e-31	8.02674e-30
100511642	LAMA3	laminin subunit alpha 3%2C transcript variant X1	2.03639	1.70493e-31	8.15484e-30
novel.10702	-	PF04968:CHORD	1.50829	1.80333e-31	8.60821e-30
novel.14128	-	PF00069:Protein kinase domain	6.36892	2.44004e-31	1.16242e-29
110261428	BMF	Bcl2 modifying factor%2C transcript variant X4	-2.07757	2.70477e-31	1.28596e-29
397441	CD86	CD86 molecule%2C transcript variant X6	2.0427	2.97204e-31	1.41021e-29
100049702	VPS33A	VPS33A%2C CORVET/HOPS core subunit%2C transcript variant X1	-1.37326	3.1107e-31	1.47306e-29
novel.573	-	-	-1.71815	3.74144e-31	1.76822e-29
110262155	PCDH18	protocadherin 18%2C transcript variant X2	2.47879	5.16973e-31	2.43839e-29
100135051	TUBA1A	tubulin alpha 1a	-1.11352	6.36521e-31	2.99631e-29
100516180	RAB3D	RAB3D%2C member RAS oncogene family	-1.23322	7.43884e-31	3.49479e-29
novel.11669	-	-	2.91831	1.29425e-30	6.06842e-29
110255319	DHRSX	dehydrogenase/reductase X-linked	1.8937	1.39145e-30	6.51135e-29
100153803	SH3PXD2A	SH3 and PX domains 2A%2C transcript variant X1	1.8201	1.4168e-30	6.61693e-29
397667	FHL1	four and a half LIM domains 1%2C transcript variant X3	3.31103	1.46983e-30	6.85114e-29
397009	ANGPT1	angiopoietin 1%2C transcript variant X5	2.5191	1.6076e-30	7.47865e-29
100525816	RHEBL1	Ras homolog enriched in brain like 1%2C transcript variant X2	2.26904	1.63721e-30	7.59692e-29
100154419	XKR9	XK related 9%2C transcript variant X2	3.51276	1.63942e-30	7.59692e-29
novel.1138	-	PF00583:Acetyltransferase (GNAT) family	2.97655	1.66276e-30	7.69008e-29
396741	DNAJB1	DnaJ heat shock protein family (Hsp40) member B1	2.66488	2.43091e-30	1.12209e-28
novel.17782	-	-	-1.85656	2.60761e-30	1.20132e-28
100158095	SLC35E4	solute carrier family 35 member E4%2C transcript variant X4	1.50865	2.748e-30	1.26355e-28
100152419	FRZB	frizzled-related protein%2C transcript variant X1	6.71079	2.76224e-30	1.26764e-28
novel.12180	-	-	2.21807	3.05322e-30	1.39848e-28
novel.2791	-	-	6.00113	3.45181e-30	1.57801e-28
100522902	PTPN4	protein tyrosine phosphatase%2C non-receptor type 4%2C transcript variant X3	-1.36016	4.84283e-30	2.20967e-28
novel.1531	-	-	5.50359	5.18617e-30	2.36179e-28
100627122	SMCHD1	structural maintenance of chromosomes flexible hinge domain containing 1%2C transcript variant X2	1.08544	5.41572e-30	2.46162e-28
100519089	CHRAC1	chromatin accessibility complex 1%2C transcript variant X1	1.07431	7.01737e-30	3.18353e-28
102164975	BUB1B	BUB1 mitotic checkpoint serine/threonine kinase B%2C transcript variant X1	-1.25769	7.36605e-30	3.33535e-28
100157644	TMEM200A	transmembrane protein 200A%2C transcript variant X1	-1.44903	7.98105e-30	3.60695e-28
100523492	LOC100523492	guanylate-binding protein 5%2C transcript variant X4	2.72217	8.18193e-30	3.69072e-28
novel.4155	-	PF00046:Homeobox domain|PF00157:Pou domain - N-terminal to homeobox domain	-1.51459	9.80133e-30	4.41282e-28
novel.6470	-	-	3.27086	1.04504e-29	4.69614e-28
novel.10701	-	-	5.56573	1.05516e-29	4.73268e-28
100153983	NR2F2	nuclear receptor subfamily 2 group F member 2%2C transcript variant 2	-1.63066	1.11118e-29	4.97458e-28
100152067	ADCY4	adenylate cyclase 4%2C transcript variant X1	5.20362	1.14433e-29	5.11336e-28
100145886	RAI14	retinoic acid induced 14	1.278	1.28048e-29	5.71097e-28
100623376	GFOD2	glucose-fructose oxidoreductase domain containing 2%2C transcript variant X1	1.16258	1.39256e-29	6.19923e-28
100517963	RMI1	RecQ mediated genome instability 1%2C transcript variant X1	1.65578	1.42772e-29	6.34387e-28
110260250	LOC110260250	uncharacterized LOC110260250	3.16535	1.6408e-29	7.27707e-28
100513544	ZDHHC18	zinc finger DHHC-type containing 18%2C transcript variant X2	1.25134	2.38771e-29	1.05541e-27
novel.9244	-	PF01388:ARID/BRIGHT DNA binding domain	4.24885	2.38856e-29	1.05541e-27
novel.6303	-	PF00069:Protein kinase domain|PF00531:Death domain	-1.35115	2.40716e-29	1.06165e-27
100144302	ATF4	activating transcription factor 4%2C transcript variant X1	1.07948	2.55596e-29	1.12519e-27
100738961	LOC100738961	probable GPI-anchored adhesin-like protein PGA55	8.97519	2.81206e-29	1.23564e-27
100155072	CFAP100	cilia and flagella associated protein 100%2C transcript variant X1	2.32815	3.02477e-29	1.32421e-27
100155896	CCDC6	coiled-coil domain containing 6	1.28015	3.43213e-29	1.49979e-27
100155834	RNF152	ring finger protein 152%2C transcript variant X6	1.69054	3.51266e-29	1.53216e-27
397434	KCNMA1	potassium calcium-activated channel subfamily M alpha 1%2C transcript variant X42	1.61134	4.00564e-29	1.74399e-27
100135049	SLA-DOB	MHC class II%2C DO beta%2C transcript variant X2	4.4224	4.53318e-29	1.97007e-27
100523953	ERAP1	endoplasmic reticulum aminopeptidase 1	1.12016	5.26337e-29	2.28323e-27
444999	GUCY1B3	guanylate cyclase 1 soluble subunit beta%2C transcript variant X1	-1.07269	5.32324e-29	2.30499e-27
novel.4976	-	-	4.52225	6.34342e-29	2.74174e-27
100523323	NOX4	NADPH oxidase 4%2C transcript variant X5	-1.25922	7.2644e-29	3.13411e-27
100515860	PXK	PX domain containing serine/threonine kinase like%2C transcript variant X2	1.43836	7.29333e-29	3.14089e-27
100513653	SLC35F6	solute carrier family 35 member F6%2C transcript variant X1	1.12261	8.02476e-29	3.44963e-27
100622301	REM2	RRAD and GEM like GTPase 2%2C transcript variant X3	2.73181	9.32473e-29	4.00122e-27
100625293	EDEM3	ER degradation enhancing alpha-mannosidase like protein 3%2C transcript variant X5	-1.04257	1.25949e-28	5.39472e-27
100516296	EGR3	early growth response 3%2C transcript variant X2	2.27505	1.35587e-28	5.79709e-27
100158093	KHNYN	KH and NYN domain containing%2C transcript variant X1	1.05358	1.43908e-28	6.14178e-27
novel.15991	-	-	6.10832	1.7385e-28	7.40639e-27
100516528	BMX	BMX non-receptor tyrosine kinase%2C transcript variant X1	-2.37331	1.83425e-28	7.80031e-27
novel.2315	-	-	5.24873	1.90818e-28	8.10024e-27
100156359	LIMK2	LIM domain kinase 2%2C transcript variant X1	-1.04377	2.36393e-28	1.0017e-26
novel.16451	-	-	2.90903	2.63188e-28	1.11326e-26
808501	ND1	-	-1.37577	3.23585e-28	1.3663e-26
100217388	IL29	interleukin 29 (interferon%2C lambda 1)	8.88241	3.25033e-28	1.36998e-26
novel.7858	-	-	8.94829	3.77058e-28	1.58645e-26
novel.16420	-	PF01342:SAND domain|PF03172:HSR domain	1.41015	3.85519e-28	1.61918e-26
novel.603	-	-	1.2872	3.96701e-28	1.6632e-26
100152912	STXBP5	syntaxin binding protein 5%2C transcript variant X1	-1.26191	4.93246e-28	2.06434e-26
novel.9807	-	-	6.58801	5.51222e-28	2.30293e-26
novel.15447	-	PF00176:SNF2 family N-terminal domain|PF12054:Domain of unknown function (DUF3535)	3.03966	5.85389e-28	2.44138e-26
100513626	ABCC5	ATP binding cassette subfamily C member 5%2C transcript variant X1	-1.20742	6.83895e-28	2.84223e-26
100625505	VPS13C	vacuolar protein sorting 13 homolog C%2C transcript variant X2	2.27245	8.71616e-28	3.61607e-26
novel.16657	-	PF00092:von Willebrand factor type A domain|PF08441:Integrin alpha|PF01839:FG-GAP repeat	3.32029	9.79548e-28	4.05676e-26
novel.17103	-	-	-1.61014	1.11238e-27	4.59889e-26
100524475	LOC100524475	transducin-like enhancer protein 1%2C transcript variant X3	1.20989	1.28337e-27	5.29656e-26
100158048	SIPA1L2	signal induced proliferation associated 1 like 2%2C transcript variant X5	1.94308	1.63715e-27	6.74494e-26
novel.9710	-	-	2.48124	2.1218e-27	8.72653e-26
100156584	ACP6	acid phosphatase 6%2C lysophosphatidic%2C transcript variant X1	-1.34715	2.33826e-27	9.6002e-26
100153002	PDP1	pyruvate dehyrogenase phosphatase catalytic subunit 1%2C transcript variant X3	1.03194	2.37642e-27	9.74006e-26
397614	IL4R	interleukin 4 receptor%2C transcript variant X11	-1.2906	3.55725e-27	1.45547e-25
397274	C1S	complement C1s%2C transcript variant X2	1.17421	3.62433e-27	1.48037e-25
novel.5024	-	PF00078:Reverse transcriptase (RNA-dependent DNA polymerase)|PF00077:Retroviral aspartyl protease|PF09337:His(2)-Cys(2) zinc finger|PF00665:Integrase core domain|PF00075:RNase H	-1.08147	3.67391e-27	1.49805e-25
novel.14092	-	PF10148:Schwannomin-interacting protein 1	2.33762	4.11873e-27	1.67655e-25
novel.8781	-	PF00129:Class I Histocompatibility antigen, domains alpha 1 and 2	2.66908	4.14357e-27	1.68378e-25
100514864	BZW2	basic leucine zipper and W2 domains 2%2C transcript variant X2	-1.08348	4.2535e-27	1.7255e-25
100158214	FLRT3	fibronectin leucine rich transmembrane protein 3%2C transcript variant X2	3.50525	4.43829e-27	1.7974e-25
novel.4412	-	PF11919:Domain of unknown function (DUF3437)	1.73744	5.62965e-27	2.27599e-25
110255881	ZBTB5	zinc finger and BTB domain containing 5%2C transcript variant X3	1.5156	6.57948e-27	2.65547e-25
100623494	MGAM2	maltase-glucoamylase 2 (putative)%2C transcript variant X2	1.22457	6.70487e-27	2.70149e-25
100521443	CDC42EP3	CDC42 effector protein 3%2C transcript variant X7	1.09062	7.10858e-27	2.85931e-25
novel.17519	-	PF00017:SH2 domain	2.02737	7.15686e-27	2.87387e-25
100520218	ADAMTS9	ADAM metallopeptidase with thrombospondin type 1 motif 9%2C transcript variant X2	-2.17434	7.67568e-27	3.077e-25
100628094	NCCRP1	non-specific cytotoxic cell receptor protein 1 homolog (zebrafish)	1.84287	7.77686e-27	3.11231e-25
397668	AREG	amphiregulin	2.56557	8.32194e-27	3.32486e-25
100627504	PTCH1	patched 1%2C transcript variant X3	-2.42686	8.68553e-27	3.4643e-25
106505960	LOC106505960	uncharacterized LOC106505960	3.66815	9.12266e-27	3.63256e-25
novel.10646	-	-	1.51405	1.04202e-26	4.13537e-25
novel.12433	-	PF00530:Scavenger receptor cysteine-rich domain|PF07707:BTB And C-terminal Kelch	1.42972	1.08665e-26	4.3053e-25
102163141	RBKS	ribokinase%2C transcript variant X1	2.73139	1.20846e-26	4.77994e-25
novel.9926	-	-	2.79515	1.23212e-26	4.86542e-25
novel.16736	-	PF13855:Leucine rich repeat	2.0592	1.31689e-26	5.19157e-25
100524836	EPB41L2	erythrocyte membrane protein band 4.1 like 2%2C transcript variant X36	2.15236	1.33786e-26	5.26549e-25
100512797	GVIN1	GTPase%2C very large interferon inducible 1	4.47707	1.52056e-26	5.97467e-25
100738830	NRGN	neurogranin%2C transcript variant X3	1.31542	2.02901e-26	7.95935e-25
novel.3574	-	PF00429:ENV polyprotein (coat polyprotein)	-1.1577	2.10507e-26	8.24411e-25
110262190	PPM1K	protein phosphatase%2C Mg2+/Mn2+ dependent 1K%2C transcript variant X7	1.37709	2.25958e-26	8.83466e-25
novel.5009	-	-	3.24859	2.62854e-26	1.02436e-24
100525173	FAM114A1	family with sequence similarity 114 member A1	-1.10453	2.65384e-26	1.03252e-24
novel.6355	-	-	2.28985	3.95716e-26	1.53458e-24
100620967	RLF	rearranged L-myc fusion%2C transcript variant X1	1.17863	4.08299e-26	1.58079e-24
novel.8782	-	-	2.97977	4.17334e-26	1.61315e-24
100627208	BUB1	BUB1 mitotic checkpoint serine/threonine kinase%2C transcript variant X2	-1.19212	4.42751e-26	1.70861e-24
100622547	NASP	nuclear autoantigenic sperm protein%2C transcript variant X2	-1.57595	5.16726e-26	1.99086e-24
397422	CCL2	chemokine (C-C motif) ligand 2	3.99961	5.20165e-26	2.00087e-24
novel.939	-	-	2.03086	5.73409e-26	2.20211e-24
novel.10700	-	-	5.71519	6.09039e-26	2.33517e-24
100620969	EREG	epiregulin	1.01747	8.38485e-26	3.20974e-24
100154087	SOX17	SRY-box 17	-1.09043	9.08126e-26	3.47074e-24
100127483	BMPR2	bone morphogenetic protein receptor type 2	-1.21132	9.24416e-26	3.52732e-24
100048931	HSPH1	heat shock protein family H (Hsp110) member 1%2C transcript variant X1	2.5588	1.02582e-25	3.908e-24
100525762	DDIT4L	DNA damage inducible transcript 4 like%2C transcript variant X1	-3.59619	1.15591e-25	4.39652e-24
novel.8780	-	PF00129:Class I Histocompatibility antigen, domains alpha 1 and 2|PF07654:Immunoglobulin C1-set domain|PF06623:MHC_I C-terminus	1.38247	1.31166e-25	4.98096e-24
100152082	ISLR	immunoglobulin superfamily containing leucine rich repeat%2C transcript variant X3	-1.0093	1.38081e-25	5.2352e-24
100157844	PIM1	Pim-1 proto-oncogene%2C serine/threonine kinase	1.45687	1.5541e-25	5.86414e-24
100523554	GNPTAB	N-acetylglucosamine-1-phosphate transferase alpha and beta subunits%2C transcript variant X4	-1.13996	1.58673e-25	5.97778e-24
102164569	NRG1	neuregulin 1%2C transcript variant X1	1.62009	1.59925e-25	6.01541e-24
novel.11462	-	PF00665:Integrase core domain|PF09337:His(2)-Cys(2) zinc finger|PF00077:Retroviral aspartyl protease|PF00075:RNase H|PF00078:Reverse transcriptase (RNA-dependent DNA polymerase)	-1.25568	1.62383e-25	6.0982e-24
novel.6259	-	-	3.95272	1.90656e-25	7.14869e-24
novel.6105	-	PF00104:Ligand-binding domain of nuclear hormone receptor|PF00105:Zinc finger, C4 type (two domains)	1.18212	2.15933e-25	8.07099e-24
396665	TGFBR1	transforming growth factor beta receptor 1%2C transcript variant X2	-1.13176	2.37926e-25	8.8763e-24
novel.8587	-	PF01412:Putative GTPase activating protein for Arf	6.77381	2.38225e-25	8.8763e-24
100623009	SLC43A2	solute carrier family 43 member 2%2C transcript variant X5	-1.30214	2.40808e-25	8.9585e-24
novel.17662	-	-	3.91931	2.50052e-25	9.28788e-24
novel.9750	-	-	-1.41049	2.92002e-25	1.08123e-23
100516614	PLLP	plasmolipin%2C transcript variant X1	1.58887	3.00715e-25	1.11058e-23
novel.12729	-	PF15237:PTRF/SDPR family	1.33557	3.00865e-25	1.11058e-23
497623	P2RX7	purinergic receptor P2X 7%2C transcript variant X1	-1.67912	3.86972e-25	1.42622e-23
novel.13026	-	PF00076:RNA recognition motif. (a.k.a. RRM, RBD, or RNP domain)|PF00641:Zn-finger in Ran binding protein and others	2.07358	4.25402e-25	1.56543e-23
397568	CAT	catalase	-1.07697	4.98711e-25	1.82953e-23
100156280	GREM1	gremlin 1%2C DAN family BMP antagonist%2C transcript variant X1	1.58621	5.38811e-25	1.97359e-23
100155147	PIK3IP1	phosphoinositide-3-kinase interacting protein 1%2C transcript variant X2	-1.41137	5.55945e-25	2.03322e-23
100524437	PARP11	poly(ADP-ribose) polymerase family member 11%2C transcript variant X1	1.35529	6.1959e-25	2.2625e-23
100152675	BNIP3L	BCL2 interacting protein 3 like%2C transcript variant X1	-1.02089	6.29003e-25	2.29335e-23
100521564	ARAP2	ArfGAP with RhoGAP domain%2C ankyrin repeat and PH domain 2%2C transcript variant X5	1.65121	6.39663e-25	2.32865e-23
novel.14778	-	PF00240:Ubiquitin family	1.39101	6.78564e-25	2.46649e-23
novel.15456	-	PF16165:Ferlin C-terminus|PF08150:FerB (NUC096) domain|PF00168:C2 domain	1.63878	8.55336e-25	3.10428e-23
novel.14290	-	-	3.91809	8.92779e-25	3.23524e-23
100521379	ZNF787	zinc finger protein 787%2C transcript variant X4	1.15383	1.03248e-24	3.73578e-23
397186	SLC31A1	solute carrier family 31 member 1	-1.08046	1.05981e-24	3.82885e-23
100126281	CYP3A46	cytochrome P450 3A46	1.14428	1.31965e-24	4.76036e-23
100518646	LGR4	leucine rich repeat containing G protein-coupled receptor 4%2C transcript variant X1	-1.04239	1.32933e-24	4.78695e-23
397021	TAGLN	transgelin	1.26237	1.33105e-24	4.78695e-23
novel.9422	-	-	8.79063	1.41831e-24	5.09305e-23
novel.999	-	-	2.59753	1.4526e-24	5.20834e-23
448981	C2	complement C2	3.47564	1.4808e-24	5.30146e-23
novel.14887	-	PF06333:Mediator complex subunit 13 C-terminal	1.37874	1.59493e-24	5.69288e-23
novel.17455	-	-	1.57026	1.90523e-24	6.79029e-23
100152503	ABCD4	ATP binding cassette subfamily D member 4	1.3691	1.98435e-24	7.0511e-23
novel.12600	-	PF00632:HECT-domain (ubiquitin-transferase)	1.28221	2.18027e-24	7.7242e-23
106510023	LOC106510023	uncharacterized LOC106510023	2.10686	2.21191e-24	7.82463e-23
110259144	ZBED1	zinc finger BED-type containing 1%2C transcript variant X1	1.69129	2.56156e-24	9.04805e-23
100152345	CEP152	centrosomal protein 152%2C transcript variant X1	1.25428	2.66224e-24	9.38973e-23
novel.15783	-	PF14629:Origin recognition complex (ORC) subunit 4 C-terminus	1.92815	3.15484e-24	1.10942e-22
100520273	LOC100520273	poly [ADP-ribose] polymerase 15	8.62629	3.18813e-24	1.11947e-22
novel.14109	-	-	3.08718	3.3161e-24	1.16269e-22
novel.4825	-	-	5.2345	3.34865e-24	1.17237e-22
novel.9413	-	-	4.41551	4.08275e-24	1.42728e-22
novel.18690	-	PF16673:TNF receptor-associated factor BIRC3 binding domain	1.60918	4.24102e-24	1.48043e-22
100522554	BAG2	BCL2 associated athanogene 2%2C transcript variant X1	1.65656	4.39461e-24	1.5318e-22
397683	IL15	interleukin 15%2C transcript variant X6	1.77456	4.55819e-24	1.58649e-22
100626520	NKX2-2	NK2 homeobox 2%2C transcript variant X2	4.62979	4.62574e-24	1.60765e-22
100337661	MSH2	mutS homolog 2	-1.34991	4.733e-24	1.64252e-22
100516153	RCVRN	recoverin%2C transcript variant X1	3.62122	4.83434e-24	1.67475e-22
rna78618	-	tRNA-His	-1.51145	4.83996e-24	1.67475e-22
100517493	MTMR4	myotubularin related protein 4%2C transcript variant X1	1.08029	4.93774e-24	1.70611e-22
100737113	LOC100737113	keratin%2C type I cytoskeletal 17	8.78882	5.04681e-24	1.74126e-22
novel.502	-	PF00001:7 transmembrane receptor (rhodopsin family)	1.13875	5.16402e-24	1.77912e-22
100151826	VAV3	vav guanine nucleotide exchange factor 3	-1.66828	5.60659e-24	1.92601e-22
100514933	CHN2	chimerin 2%2C transcript variant X3	1.19251	5.75385e-24	1.9709e-22
novel.7296	-	PF00019:Transforming growth factor beta like domain|PF00688:TGF-beta propeptide	1.51305	6.20167e-24	2.12124e-22
novel.11581	-	PF13671:AAA domain|PF00622:SPRY domain|PF02037:SAP domain	1.50676	6.82658e-24	2.33163e-22
100155760	LOC100155760	interferon omega 1	4.38608	7.36755e-24	2.51279e-22
100154269	MXI1	MAX interactor 1%2C dimerization protein%2C transcript variant X1	-1.5322	7.91712e-24	2.69636e-22
100621961	CDC26	cell division cycle 26%2C transcript variant X1	-1.17867	8.4347e-24	2.86852e-22
100233182	GK	glycerol kinase%2C transcript variant X2	-1.19211	9.01631e-24	3.06194e-22
novel.2065	-	-	3.97875	1.15404e-23	3.91355e-22
novel.16276	-	PF00067:Cytochrome P450	-1.35283	1.59206e-23	5.38357e-22
100525009	ZNF395	zinc finger protein 395%2C transcript variant X1	-1.16416	1.73067e-23	5.83516e-22
novel.17233	-	-	3.24194	1.73294e-23	5.83516e-22
102161415	LPAR5	lysophosphatidic acid receptor 5%2C transcript variant X1	1.8235	1.73297e-23	5.83516e-22
100525217	TRIB2	tribbles pseudokinase 2%2C transcript variant X2	-1.58847	1.7646e-23	5.93326e-22
novel.11090	-	-	4.50332	1.77041e-23	5.94438e-22
novel.6636	-	-	-2.33619	2.2089e-23	7.39577e-22
novel.16867	-	PF01417:ENTH domain	1.56335	2.29508e-23	7.67352e-22
100620112	FBXW7	F-box and WD repeat domain containing 7%2C transcript variant X3	1.47612	2.43794e-23	8.13969e-22
100521769	TCIRG1	T-cell immune regulator 1%2C ATPase H+ transporting V0 subunit a3%2C transcript variant X2	2.28552	2.71881e-23	9.05205e-22
110257500	PCMTD2	protein-L-isoaspartate (D-aspartate) O-methyltransferase domain containing 2%2C transcript variant X4	-1.17874	3.31488e-23	1.09904e-21
novel.12315	-	PF02210:Laminin G domain|PF00594:Vitamin K-dependent carboxylation/gamma-carboxyglutamic (GLA) domain|PF00054:Laminin G domain|PF14670:Coagulation Factor Xa inhibitory site|PF07645:Calcium-binding EGF domain	-1.39216	4.55157e-23	1.50696e-21
110256134	GID4	GID complex subunit 4 homolog	1.1333	4.6336e-23	1.53199e-21
100525434	RBMS1	RNA binding motif single stranded interacting protein 1%2C transcript variant X9	1.74363	5.02199e-23	1.65809e-21
110260904	OSGIN1	oxidative stress induced growth inhibitor 1	1.30999	5.30721e-23	1.74983e-21
novel.5485	-	-	4.17472	5.31993e-23	1.7516e-21
novel.17136	-	-	3.24402	5.41699e-23	1.78109e-21
110257870	LOC110257870	uncharacterized LOC110257870	2.01607	5.60893e-23	1.84165e-21
novel.1184	-	-	5.14455	6.09223e-23	1.99642e-21
novel.8723	-	PF00538:linker histone H1 and H5 family	2.36818	6.09709e-23	1.99642e-21
novel.10642	-	-	2.34708	6.14228e-23	2.00845e-21
100627913	PROSER2	proline and serine rich 2	2.74359	7.04901e-23	2.29862e-21
110260979	LOC110260979	uncharacterized LOC110260979	-1.31046	9.60346e-23	3.12731e-21
100738532	TBCK	TBC1 domain containing kinase%2C transcript variant X3	-1.16173	1.0136e-22	3.29621e-21
100624677	HNMT	histamine N-methyltransferase	-1.25079	1.04172e-22	3.38302e-21
novel.10827	-	-	-2.45317	1.11271e-22	3.60863e-21
novel.10144	-	PF02934:GatB/GatE catalytic domain	2.53506	1.24847e-22	4.04341e-21
100512104	ACSS3	acyl-CoA synthetase short-chain family member 3%2C transcript variant X1	-1.14528	1.26727e-22	4.09871e-21
novel.14897	-	-	5.76933	1.27794e-22	4.12761e-21
100521293	C12H17orf100	chromosome 12 C17orf100 homolog%2C transcript variant X1	2.4348	1.30577e-22	4.21178e-21
novel.2962	-	PF00651:BTB/POZ domain|PF01344:Kelch motif|PF07707:BTB And C-terminal Kelch	2.46129	1.43016e-22	4.60675e-21
novel.16422	-	PF03172:HSR domain	2.57222	1.4458e-22	4.65083e-21
574058	CD274	CD274 molecule%2C transcript variant X4	1.44571	1.4835e-22	4.76564e-21
novel.3123	-	-	1.65959	1.60898e-22	5.15479e-21
100155412	SUFU	SUFU negative regulator of hedgehog signaling	4.99596	1.78331e-22	5.70562e-21
novel.675	-	PF02816:Alpha-kinase family|PF16519:Tetramerisation domain of TRPM	1.41587	1.79072e-22	5.72163e-21
novel.10062	-	PF04146:YT521-B-like domain	1.736	2.01701e-22	6.43602e-21
100154155	SLC46A3	solute carrier family 46 member 3%2C transcript variant X4	-1.50643	2.03868e-22	6.49644e-21
novel.4504	-	PF00069:Protein kinase domain	3.35098	2.42309e-22	7.71108e-21
100623482	CBLL1	Cbl proto-oncogene like 1%2C transcript variant X3	1.04246	2.5322e-22	8.04751e-21
novel.18493	-	PF00412:LIM domain	2.99533	2.53918e-22	8.05894e-21
novel.2327	-	-	1.95028	2.64965e-22	8.39833e-21
396925	VCAM1	vascular cell adhesion molecule 1	3.86054	2.71803e-22	8.60359e-21
100312969	ELOVL1	ELOVL fatty acid elongase 1%2C transcript variant X1	1.34214	2.74583e-22	8.68005e-21
100513220	GPR83	G protein-coupled receptor 83	6.28872	3.57172e-22	1.12758e-20
110261061	UBE2S	ubiquitin conjugating enzyme E2 S	1.03087	3.72059e-22	1.17179e-20
100514032	LOC100514032	olfactory receptor 1052-like	8.48144	3.7216e-22	1.17179e-20
novel.9883	-	PF00028:Cadherin domain	-1.20113	3.78221e-22	1.18773e-20
novel.17720	-	-	3.32762	4.19372e-22	1.31521e-20
110256540	LOC110256540	uncharacterized LOC110256540	1.6988	4.26747e-22	1.33658e-20
novel.14068	-	PF00071:Ras family	1.20688	4.67216e-22	1.4614e-20
100525669	DNAJB6	DnaJ heat shock protein family (Hsp40) member B6%2C transcript variant X7	1.41321	4.94938e-22	1.54608e-20
100511095	IER5	immediate early response 5	1.0687	5.39234e-22	1.68003e-20
100524459	SLC25A20	solute carrier family 25 member 20	-1.28533	5.8108e-22	1.80804e-20
100739829	A3GALT2	alpha 1%2C3-galactosyltransferase 2	2.20004	5.83283e-22	1.81252e-20
100157878	CSGALNACT2	chondroitin sulfate N-acetylgalactosaminyltransferase 2%2C transcript variant X5	-1.20579	5.85683e-22	1.8176e-20
novel.17211	-	-	1.98607	5.9866e-22	1.85546e-20
102157630	LOC102157630	uncharacterized LOC102157630	2.27794	6.28803e-22	1.94381e-20
414852	MAGED1	MAGE family member D1%2C transcript variant X6	-1.11656	6.45626e-22	1.99322e-20
novel.6612	-	-	3.75797	7.40357e-22	2.28272e-20
106504234	LOC106504234	putative olfactory receptor 2I1	5.49252	7.8807e-22	2.42669e-20
novel.18295	-	PF00515:Tetratricopeptide repeat|PF13844:Glycosyl transferase family 41|PF13414:TPR repeat	1.28699	8.4265e-22	2.59139e-20
novel.5974	-	-	-2.5946	9.31984e-22	2.86242e-20
100512094	GNPDA1	glucosamine-6-phosphate deaminase 1	-1.0771	1.24659e-21	3.82175e-20
novel.3167	-	-	5.44054	1.24755e-21	3.82175e-20
100523840	RHOQ	ras homolog family member Q%2C transcript variant X1	-1.08056	1.26173e-21	3.86023e-20
100525559	PDHX	pyruvate dehydrogenase complex component X	-1.07947	1.31679e-21	4.02348e-20
100623369	SEMA7A	semaphorin 7A (John Milton Hagen blood group)%2C transcript variant X1	4.23268	1.53829e-21	4.68824e-20
novel.5454	-	-	3.71576	1.56226e-21	4.75519e-20
novel.4548	-	PF00294:pfkB family carbohydrate kinase	1.14946	1.78302e-21	5.4202e-20
100522888	FCAMR	Fc fragment of IgA and IgM receptor	-2.46689	2.44647e-21	7.41805e-20
100101470	ATRN	attractin%2C transcript variant X5	-1.06192	2.88455e-21	8.73524e-20
100038004	EGR2	early growth response 2%2C transcript variant X1	2.01065	2.94612e-21	8.91032e-20
100516319	STAU2	staufen double-stranded RNA binding protein 2%2C transcript variant X20	-1.32105	3.04184e-21	9.18814e-20
100152338	2019-03-07	membrane associated ring-CH-type finger 7%2C transcript variant X11	2.43534	3.19649e-21	9.64301e-20
novel.8926	-	-	4.6499	3.45703e-21	1.04158e-19
novel.3828	-	-	1.91013	3.51313e-21	1.05714e-19
novel.650	-	-	-1.21944	3.64742e-21	1.09616e-19
novel.340	-	-	2.80954	4.02105e-21	1.2054e-19
102163155	LOC102163155	-	3.44855	4.39546e-21	1.31598e-19
novel.1185	-	-	4.98447	4.92181e-21	1.47171e-19
106509717	LOC106509717	uncharacterized LOC106509717%2C transcript variant X2	4.05679	5.01947e-21	1.49715e-19
100157701	OSGIN2	oxidative stress induced growth inhibitor family member 2%2C transcript variant X2	-1.25717	6.33447e-21	1.88701e-19
100516687	MRE11	MRE11 homolog%2C double strand break repair nuclease	-1.05647	8.12925e-21	2.41561e-19
100127488	S100A8	S100 calcium binding protein A8	-2.01182	9.41443e-21	2.794e-19
397060	DUOX2	dual oxidase 2%2C transcript variant X1	-1.94417	1.06235e-20	3.1489e-19
novel.4941	-	-	-1.94341	1.48315e-20	4.38526e-19
100510911	CASZ1	castor zinc finger 1%2C transcript variant X1	3.04384	1.61606e-20	4.76638e-19
100512167	IKBIP	IKBKB interacting protein%2C transcript variant X3	-1.45429	1.75792e-20	5.17835e-19
100511669	FIG4	FIG4 phosphoinositide 5-phosphatase%2C transcript variant X1	-1.41862	2.03401e-20	5.98421e-19
100620430	SAP30	Sin3A associated protein 30%2C transcript variant X6	-1.23105	2.06312e-20	6.06237e-19
100739105	USP49	ubiquitin specific peptidase 49%2C transcript variant X7	1.76003	2.17058e-20	6.37025e-19
novel.10976	-	PF04819:Family of unknown function (DUF716)	1.82775	2.19291e-20	6.42784e-19
novel.6585	-	PF00443:Ubiquitin carboxyl-terminal hydrolase	4.43765	2.23576e-20	6.53732e-19
100626657	HERC6	HECT and RLD domain containing E3 ubiquitin protein ligase family member 6%2C transcript variant X7	2.29621	2.30454e-20	6.71367e-19
novel.2375	-	-	-1.09196	2.3267e-20	6.76994e-19
100525045	ERBB3	erb-b2 receptor tyrosine kinase 3	-1.16827	2.41065e-20	7.00563e-19
100739314	PAIP2B	poly(A) binding protein interacting protein 2B%2C transcript variant X2	-2.29676	2.43817e-20	7.07693e-19
100524016	LOC100524016	mesothelin	2.6283	2.62941e-20	7.62272e-19
100625757	ARID2	AT-rich interaction domain 2	-1.07266	2.68963e-20	7.7878e-19
novel.14908	-	-	4.38583	2.69982e-20	7.80779e-19
novel.11541	-	-	3.75817	3.02696e-20	8.74324e-19
novel.10752	-	-	1.93919	3.18163e-20	9.16772e-19
novel.12432	-	PF00386:C1q domain|PF01391:Collagen triple helix repeat (20 copies)	-3.25192	3.24084e-20	9.31575e-19
novel.18317	-	-	3.07472	3.338e-20	9.58344e-19
novel.16610	-	PF14664:Rapamycin-insensitive companion of mTOR, N-term|PF14668:Rapamycin-insensitive companion of mTOR, domain 5|PF14665:Rapamycin-insensitive companion of mTOR, phosphorylation-site|PF14663:Rapamycin-insensitive companion of mTOR RasGEF_N domain|PF14666:Rapamycin-insensitive companion of mTOR, middle domain	3.09484	3.35877e-20	9.63145e-19
novel.18877	-	-	1.25446	3.42751e-20	9.81673e-19
novel.9040	-	PF00341:PDGF/VEGF domain	1.01321	3.43942e-20	9.83897e-19
novel.196	-	-	2.2296	3.46909e-20	9.91193e-19
novel.5015	-	-	2.20923	3.79456e-20	1.08289e-18
novel.12866	-	-	-3.28847	3.83112e-20	1.0907e-18
100626164	PMEL	premelanosome protein	2.11917	4.63216e-20	1.3156e-18
100151944	LRRC20	leucine rich repeat containing 20%2C transcript variant X1	-1.38796	5.13834e-20	1.45762e-18
110255331	LOC110255331	acyl-coenzyme A thioesterase 1-like	-1.08117	5.16618e-20	1.46377e-18
100525283	SEMA4C	semaphorin 4C%2C transcript variant X5	-1.66266	5.26044e-20	1.48829e-18
100520160	CNR1	cannabinoid receptor 1%2C transcript variant X5	-1.68622	5.26523e-20	1.48829e-18
110256310	PLS1	plastin 1%2C transcript variant X1	-1.03323	6.2804e-20	1.77103e-18
100513691	FZD7	frizzled class receptor 7	-1.42285	6.48275e-20	1.82592e-18
100157279	POU3F2	POU class 3 homeobox 2	-1.57593	7.10778e-20	1.9996e-18
110260996	LOC110260996	uncharacterized LOC110260996	8.45514	7.9161e-20	2.22174e-18
100624743	SERINC5	serine incorporator 5%2C transcript variant X2	-1.20874	8.54234e-20	2.39468e-18
novel.1393	-	-	4.56057	8.59118e-20	2.40553e-18
novel.12983	-	-	1.88819	8.92169e-20	2.49513e-18
100515573	TLK2	tousled like kinase 2%2C transcript variant X9	1.02663	1.01053e-19	2.81292e-18
novel.135	-	-	1.99225	1.11503e-19	3.10017e-18
novel.3928	-	-	1.43397	1.14538e-19	3.18085e-18
100517234	HLX	H2.0 like homeobox	2.02588	1.16042e-19	3.21885e-18
novel.15288	-	PF01562:Reprolysin family propeptide|PF05986:ADAM-TS Spacer 1|PF00090:Thrombospondin type 1 domain|PF01421:Reprolysin (M12B) family zinc metalloprotease	-2.32003	1.22306e-19	3.38077e-18
100155997	ACYP1	acylphosphatase 1%2C transcript variant X13	-1.12148	1.23556e-19	3.41136e-18
novel.15994	-	PF00782:Dual specificity phosphatase, catalytic domain	1.7376	1.29359e-19	3.56741e-18
100156062	LOC100156062	apolipoprotein L3%2C transcript variant X5	4.01143	1.44098e-19	3.96928e-18
100625876	SLC2A5	solute carrier family 2 member 5	-1.86119	1.5226e-19	4.18442e-18
novel.5427	-	-	1.30207	1.7077e-19	4.68228e-18
novel.6111	-	-	3.35069	1.72572e-19	4.72626e-18
100153078	FZD3	frizzled class receptor 3%2C transcript variant X1	-1.77127	1.74384e-19	4.77038e-18
100516227	ATR	ATR serine/threonine kinase	-1.08457	1.79249e-19	4.89221e-18
novel.3506	-	-	8.26555	1.84385e-19	5.02661e-18
novel.14580	-	-	-1.54445	1.85111e-19	5.04061e-18
100738866	RBBP9	RB binding protein 9%2C serine hydrolase	-1.06659	1.92199e-19	5.22764e-18
100523234	LHFPL2	lipoma HMGIC fusion partner-like 2%2C transcript variant X14	1.07728	1.9355e-19	5.25836e-18
100101925	PPP2R5A	protein phosphatase 2 regulatory subunit B'alpha	-1.21892	2.12485e-19	5.76621e-18
100415810	SPATA6	spermatogenesis associated 6%2C transcript variant X1	-1.16592	2.16232e-19	5.8612e-18
novel.2148	-	-	3.83825	2.23753e-19	6.05815e-18
100152765	WSB2	WD repeat and SOCS box containing 2%2C transcript variant X2	3.26058	2.30283e-19	6.22786e-18
100525245	ENAH	enabled homolog (Drosophila)%2C transcript variant X20	1.02867	2.31134e-19	6.24377e-18
novel.11380	-	PF00053:Laminin EGF domain	3.43774	2.42349e-19	6.5393e-18
novel.6711	-	PF12632:Mysoin-binding motif of peroxisomes	2.65178	2.56187e-19	6.89702e-18
novel.5249	-	-	3.97577	2.59955e-19	6.99055e-18
106504252	LOC106504252	uncharacterized LOC106504252%2C transcript variant X5	3.08642	2.68774e-19	7.21955e-18
102158016	ARSB	arylsulfatase B%2C transcript variant X1	-1.06378	2.71628e-19	7.28796e-18
100155594	GPR161	G protein-coupled receptor 161%2C transcript variant X1	-1.37688	2.75487e-19	7.38317e-18
novel.3839	-	-	6.20604	2.77811e-19	7.43706e-18
novel.1950	-	PF13424:Tetratricopeptide repeat	1.81397	2.91524e-19	7.78663e-18
novel.15986	-	-	2.278	3.12788e-19	8.34522e-18
100513149	ODF2L	outer dense fiber of sperm tails 2 like%2C transcript variant X21	1.51676	3.14337e-19	8.37715e-18
397241	PPP3CA	protein phosphatase 3 catalytic subunit alpha%2C transcript variant X3	1.00211	3.40468e-19	9.06206e-18
100515040	LIMCH1	LIM and calponin homology domains 1	3.47302	3.408e-19	9.06206e-18
100515264	CAMK2N1	calcium/calmodulin dependent protein kinase II inhibitor 1	1.42477	3.56521e-19	9.46952e-18
100524160	ACER3	alkaline ceramidase 3%2C transcript variant X3	-1.07733	3.72783e-19	9.88276e-18
100515664	GGN	gametogenetin	2.03612	3.72911e-19	9.88276e-18
100155763	MSL2	male-specific lethal 2 homolog (Drosophila)%2C transcript variant X1	1.06183	3.89566e-19	1.03012e-17
100514101	RBM12B	RNA binding motif protein 12B%2C transcript variant X9	-1.24739	4.05913e-19	1.07096e-17
novel.16599	-	PF12830:Sister chromatid cohesion C-terminus|PF12765:HEAT repeat associated with sister chromatid cohesion	-1.19278	4.76549e-19	1.25454e-17
102165975	LOC102165975	uncharacterized LOC102165975%2C transcript variant X4	1.43487	5.00005e-19	1.31484e-17
novel.2957	-	PF00621:RhoGEF domain|PF00130:Phorbol esters/diacylglycerol binding domain (C1 domain)	1.93201	5.24165e-19	1.37685e-17
110257405	LOC110257405	RNA-binding protein 25-like	-1.49574	5.90279e-19	1.5488e-17
novel.12847	-	-	-1.82981	6.23276e-19	1.63358e-17
100523718	TMEM86A	transmembrane protein 86A	-2.18362	6.88508e-19	1.80256e-17
novel.18263	-	PF04031:Las1-like	1.54239	7.08834e-19	1.85373e-17
100154639	PBX1	PBX homeobox 1%2C transcript variant X3	-1.16425	7.23637e-19	1.89036e-17
novel.16497	-	-	-2.13466	7.65943e-19	1.99868e-17
100525891	EIF4E3	eukaryotic translation initiation factor 4E family member 3%2C transcript variant X2	1.64118	8.20549e-19	2.13883e-17
novel.4950	-	-	8.43411	8.54539e-19	2.22498e-17
100626904	IL1R1	interleukin 1 receptor type 1%2C transcript variant X4	-1.59972	8.67415e-19	2.25604e-17
novel.13833	-	PF12329:TATA element modulatory factor 1 DNA binding|PF12325:TATA element modulatory factor 1 TATA binding	1.66731	8.68513e-19	2.25642e-17
novel.12967	-	-	4.0489	9.21757e-19	2.38953e-17
100037999	TPM1	tropomyosin 1 (alpha)%2C transcript variant X7	1.07089	9.61142e-19	2.48892e-17
novel.17823	-	-	1.21417	1.01095e-18	2.61085e-17
novel.5700	-	-	5.21348	1.06522e-18	2.74348e-17
100525061	BANK1	B-cell scaffold protein with ankyrin repeats 1	1.93377	1.09197e-18	2.80934e-17
100521328	PNPLA8	patatin like phospholipase domain containing 8%2C transcript variant X5	-1.0062	1.16154e-18	2.97867e-17
100624822	GSTCD	glutathione S-transferase C-terminal domain containing	-1.30691	1.19309e-18	3.05626e-17
100152163	DLL4	delta like canonical Notch ligand 4	3.00625	1.27543e-18	3.26368e-17
100038024	IL19	interleukin 19	-2.46631	1.30345e-18	3.33178e-17
novel.987	-	PF03165:MH1 domain|PF03166:MH2 domain	1.105	1.32077e-18	3.37244e-17
novel.5434	-	PF01023:S-100/ICaBP type calcium binding domain	2.52206	1.33543e-18	3.4062e-17
397629	GPAM	glycerol-3-phosphate acyltransferase%2C mitochondrial	-1.14167	1.43846e-18	3.66115e-17
100524079	MGAT4A	mannosyl (alpha-1%2C3-)-glycoprotein beta-1%2C4-N-acetylglucosaminyltransferase%2C isozyme A%2C transcript variant X1	-1.01821	1.44916e-18	3.6843e-17
novel.6264	-	-	-1.48769	1.45066e-18	3.6843e-17
novel.9039	-	-	-2.4255	1.49452e-18	3.79165e-17
novel.14105	-	PF16186:Atypical Arm repeat|PF00514:Armadillo/beta-catenin-like repeat	3.71205	1.56132e-18	3.95269e-17
100625479	LOC100625479	cytochrome P450 1B1	-2.17478	1.65826e-18	4.19362e-17
100522202	GNG11	G protein subunit gamma 11	3.99029	1.74781e-18	4.41539e-17
novel.16253	-	PF00656:Caspase domain	1.35504	1.84345e-18	4.65207e-17
102166369	LOC102166369	uncharacterized LOC102166369%2C transcript variant X2	2.44894	2.02457e-18	5.0983e-17
100154573	GMPR	guanosine monophosphate reductase%2C transcript variant X2	1.24038	2.05171e-18	5.16119e-17
110259837	CARD11	caspase recruitment domain family member 11%2C transcript variant X3	1.45934	2.06383e-18	5.18618e-17
novel.5765	-	-	3.05589	2.12836e-18	5.34269e-17
100515445	FLT3	fms related tyrosine kinase 3%2C transcript variant X1	-1.15202	2.30101e-18	5.77e-17
novel.1724	-	PF00611:Fes/CIP4, and EFC/F-BAR homology domain	1.7107	2.39584e-18	6.00146e-17
100155958	SRF	serum response factor	1.06017	2.47958e-18	6.2047e-17
novel.14132	-	PF00083:Sugar (and other) transporter	-1.33376	2.50223e-18	6.25479e-17
100521981	PRMT9	protein arginine methyltransferase 9%2C transcript variant X1	-1.19597	2.63525e-18	6.58038e-17
novel.14508	-	PF17069:Arginine/Serine-Rich protein 1	1.51438	2.65938e-18	6.63366e-17
100157586	ELP1	elongator complex protein 1	-1.38665	2.74217e-18	6.833e-17
106508817	LOC106508817	NKG2D ligand 4-like	2.70458	2.8735e-18	7.15275e-17
100521339	ZNF503	zinc finger protein 503	2.24085	3.00846e-18	7.48087e-17
novel.16332	-	-	2.3646	3.0348e-18	7.53847e-17
100627416	TRIM2	tripartite motif containing 2%2C transcript variant X2	-1.17751	3.04103e-18	7.54608e-17
100152320	DOLK	dolichol kinase	-1.09784	3.14346e-18	7.78399e-17
novel.10064	-	-	2.21877	3.38992e-18	8.38555e-17
396558	PAQR7	progestin and adipoQ receptor family member 7	1.24359	3.5787e-18	8.84333e-17
novel.11070	-	-	4.3481	4.19896e-18	1.03331e-16
100739137	GFOD1	glucose-fructose oxidoreductase domain containing 1%2C transcript variant X1	1.4372	4.28713e-18	1.05392e-16
100525341	FAM46C	family with sequence similarity 46 member C%2C transcript variant X1	1.98831	4.45368e-18	1.0926e-16
100514878	INPP1	inositol polyphosphate-1-phosphatase%2C transcript variant X2	5.55698	4.59964e-18	1.12724e-16
396945	SERPINE1	serpin family E member 1	1.66101	4.76295e-18	1.16606e-16
110260095	NINJ1	ninjurin 1%2C transcript variant X2	1.05396	4.9042e-18	1.19941e-16
novel.15096	-	-	4.32571	4.91775e-18	1.20149e-16
novel.13599	-	-	-1.43406	5.10351e-18	1.24559e-16
100152649	ZNF710	zinc finger protein 710%2C transcript variant X4	1.03547	5.17272e-18	1.26119e-16
100302021	CLDN8	claudin 8	-3.16315	5.35538e-18	1.30439e-16
novel.15481	-	-	1.29626	5.47842e-18	1.33299e-16
novel.18898	-	-	3.49389	5.54626e-18	1.34811e-16
100462716	ATG2B	autophagy related 2B%2C transcript variant X1	-1.41208	5.5632e-18	1.35085e-16
100155278	ERMP1	endoplasmic reticulum metallopeptidase 1%2C transcript variant X1	-1.04992	5.6709e-18	1.3742e-16
novel.14095	-	-	4.27518	5.81209e-18	1.40697e-16
novel.15774	-	-	3.24374	6.14004e-18	1.48485e-16
100152950	FMO5	flavin containing monooxygenase 5%2C transcript variant X4	-1.69803	6.20866e-18	1.49992e-16
novel.5014	-	-	3.78661	6.2188e-18	1.50085e-16
100519223	DHRS9	dehydrogenase/reductase 9%2C transcript variant X3	1.88285	6.45751e-18	1.55688e-16
100155516	DMXL2	Dmx like 2%2C transcript variant X1	-1.00269	6.49378e-18	1.56403e-16
novel.3098	-	PF13857:Ankyrin repeats (many copies)|PF12796:Ankyrin repeats (3 copies)	6.01263	6.56557e-18	1.57813e-16
novel.4479	-	PF00069:Protein kinase domain	2.1028	6.69063e-18	1.60656e-16
100113467	CDK5R1	cyclin dependent kinase 5 regulatory subunit 1%2C transcript variant X1	1.51081	7.8323e-18	1.8788e-16
novel.136	-	-	2.54506	7.91994e-18	1.89791e-16
novel.15281	-	-	-1.71928	8.86917e-18	2.11897e-16
100517445	DAAM1	dishevelled associated activator of morphogenesis 1%2C transcript variant X1	1.16946	1.10201e-17	2.62233e-16
100738460	MOB3C	MOB kinase activator 3C%2C transcript variant X1	1.39047	1.10643e-17	2.6302e-16
100519889	ADGRV1	adhesion G protein-coupled receptor V1%2C transcript variant X1	-1.97301	1.21015e-17	2.86817e-16
110257073	LOC110257073	uncharacterized LOC110257073	3.32212	1.36715e-17	3.2274e-16
novel.10533	-	PF00643:B-box zinc finger|PF15227:zinc finger of C3HC4-type, RING	2.20052	1.40654e-17	3.31709e-16
novel.7657	-	-	1.92896	1.42353e-17	3.35055e-16
100515182	TTC39B	tetratricopeptide repeat domain 39B	-1.34738	1.42355e-17	3.35055e-16
novel.14666	-	PF01150:GDA1/CD39 (nucleoside phosphatase) family	1.4536	1.46316e-17	3.44037e-16
100522513	HOXB7	homeobox B7	-1.14777	1.53537e-17	3.60661e-16
100158213	AMOT	angiomotin%2C transcript variant X6	-1.33301	1.54658e-17	3.62935e-16
novel.6841	-	PF01529:DHHC palmitoyltransferase	-1.2947	1.60489e-17	3.76248e-16
100623588	KLHL20	kelch like family member 20	-1.14733	1.71333e-17	4.01274e-16
novel.16644	-	-	3.49539	1.87128e-17	4.37405e-16
100048959	GJC1	gap junction protein gamma 1%2C transcript variant X3	1.50333	1.88019e-17	4.39056e-16
novel.15622	-	-	-1.13264	2.28439e-17	5.3292e-16
100037271	ENPP1	ectonucleotide pyrophosphatase/phosphodiesterase 1%2C transcript variant X1	-1.60427	2.38939e-17	5.56867e-16
novel.13082	-	PF00400:WD domain, G-beta repeat	1.06889	2.41595e-17	5.62506e-16
100522144	RCAN3	RCAN family member 3%2C transcript variant X4	-1.15776	2.54132e-17	5.91119e-16
100626969	LPP	LIM domain containing preferred translocation partner in lipoma%2C transcript variant X5	3.11631	2.81228e-17	6.53504e-16
100622156	TNFAIP3	TNF alpha induced protein 3%2C transcript variant X1	1.31666	2.97069e-17	6.88296e-16
novel.2224	-	-	1.11716	3.286e-17	7.59872e-16
100294688	UBD	ubiquitin D	3.54297	3.37823e-17	7.80441e-16
novel.14483	-	-	3.4697	3.65607e-17	8.43806e-16
novel.3030	-	PF00104:Ligand-binding domain of nuclear hormone receptor	2.37678	4.01121e-17	9.23978e-16
novel.17723	-	-	2.60093	4.2479e-17	9.77552e-16
100157471	ATAD1	ATPase family%2C AAA domain containing 1%2C transcript variant X4	2.38149	4.31742e-17	9.92589e-16
novel.17236	-	-	3.88297	4.34159e-17	9.97182e-16
100152192	ZFAND4	zinc finger AN1-type containing 4%2C transcript variant X3	1.69281	4.72839e-17	1.08497e-15
100514245	NARS2	asparaginyl-tRNA synthetase 2%2C mitochondrial (putative)%2C transcript variant X1	-1.24144	4.74167e-17	1.08697e-15
100152394	RTN1	reticulon 1%2C transcript variant 1	1.67224	4.77026e-17	1.09247e-15
100512074	KDM2B	lysine demethylase 2B%2C transcript variant X1	-3.27398	4.81003e-17	1.10052e-15
100127489	S100A9	S100 calcium binding protein A9%2C transcript variant X2	-1.61672	5.05021e-17	1.15325e-15
100523741	SMG9	SMG9%2C nonsense mediated mRNA decay factor%2C transcript variant X1	1.06824	5.27663e-17	1.20265e-15
100521454	KCNJ14	potassium voltage-gated channel subfamily J member 14	1.93478	6.15289e-17	1.39834e-15
100156680	TBC1D32	TBC1 domain family member 32%2C transcript variant X1	1.21262	6.26412e-17	1.42226e-15
novel.10786	-	-	2.56448	6.39796e-17	1.45126e-15
100513013	ATF7IP	activating transcription factor 7 interacting protein%2C transcript variant X2	-1.02997	6.49318e-17	1.47146e-15
106509950	ASAP1	ArfGAP with SH3 domain%2C ankyrin repeat and PH domain 1%2C transcript variant X5	1.05908	6.5788e-17	1.48944e-15
100523179	ZNF638	zinc finger protein 638%2C transcript variant X5	-1.60699	6.8429e-17	1.54776e-15
100512427	CLMP	CXADR like membrane protein%2C transcript variant X3	3.11937	7.2326e-17	1.63279e-15
novel.14468	-	-	3.36635	7.42689e-17	1.67507e-15
100127159	SLC16A1	solute carrier family 16 member 1%2C transcript variant X2	-1.40843	7.70182e-17	1.73543e-15
100627772	ST3GAL2	ST3 beta-galactoside alpha-2%2C3-sialyltransferase 2%2C transcript variant X2	-1.34734	7.7366e-17	1.74161e-15
100626414	RAB29	RAB29%2C member RAS oncogene family%2C transcript variant X4	-1.10892	8.15784e-17	1.8347e-15
100155728	BLCAP	bladder cancer associated protein%2C transcript variant X4	1.23151	8.24433e-17	1.8524e-15
397479	NR4A3	nuclear receptor subfamily 4 group A member 3%2C transcript variant X1	3.0507	8.32415e-17	1.86857e-15
100628129	EMCN	endomucin	8.09186	8.37667e-17	1.87859e-15
100152154	MOBP	myelin-associated oligodendrocyte basic protein%2C transcript variant X5	4.69812	8.6216e-17	1.93169e-15
100627119	ZBTB32	zinc finger and BTB domain containing 32%2C transcript variant X5	8.12825	8.95699e-17	2.00495e-15
100514967	DHRS3	dehydrogenase/reductase 3	1.62473	9.18293e-17	2.05359e-15
novel.8058	-	-	2.48067	9.4859e-17	2.11935e-15
100737938	EYA1	EYA transcriptional coactivator and phosphatase 1%2C transcript variant X1	-1.06078	9.9169e-17	2.21149e-15
novel.12328	-	-	2.76889	1.00766e-16	2.24289e-15
100520606	ARHGAP26	Rho GTPase activating protein 26%2C transcript variant X11	1.45772	1.08904e-16	2.42176e-15
100624195	DYNC2H1	dynein cytoplasmic 2 heavy chain 1	-1.11764	1.20802e-16	2.68132e-15
100152808	WDHD1	WD repeat and HMG-box DNA binding protein 1%2C transcript variant X1	-1.13699	1.22567e-16	2.71798e-15
100739820	PAX1	paired box 1	5.92076	1.42229e-16	3.1481e-15
novel.15703	-	PF07679:Immunoglobulin I-set domain|PF07714:Protein tyrosine kinase	-1.31058	1.59738e-16	3.53236e-15
novel.726	-	-	1.4655	1.72162e-16	3.80356e-15
novel.952	-	PF00397:WW domain|PF00632:HECT-domain (ubiquitin-transferase)	4.22445	1.7646e-16	3.89489e-15
novel.17286	-	-	3.54368	1.80363e-16	3.97735e-15
novel.18235	-	PF08429:PLU-1-like protein	1.3741	1.82044e-16	4.01069e-15
novel.12231	-	-	5.05742	1.83102e-16	4.03028e-15
novel.17279	-	PF00076:RNA recognition motif. (a.k.a. RRM, RBD, or RNP domain)|PF15519:linker between RRM2 and RRM3 domains in RBM39 protein	1.16401	1.84902e-16	4.06613e-15
100188980	PGAM2	phosphoglycerate mutase 2%2C transcript variant X2	1.53097	1.94354e-16	4.26609e-15
100154771	RAB27B	RAB27B%2C member RAS oncogene family%2C transcript variant X2	-1.42104	1.98611e-16	4.35552e-15
100621544	RNF19B	ring finger protein 19B%2C transcript variant X2	2.69091	2.27076e-16	4.97515e-15
novel.7352	-	PF08205:CD80-like C2-set immunoglobulin domain|PF07686:Immunoglobulin V-set domain	1.33604	2.30217e-16	5.03935e-15
110256394	XXYLT1	xyloside xylosyltransferase 1	-1.05535	2.46492e-16	5.39062e-15
100525621	CDK19	cyclin dependent kinase 19%2C transcript variant X6	-1.26063	2.46808e-16	5.39257e-15
novel.970	-	-	4.20079	2.81183e-16	6.12674e-15
novel.4164	-	-	1.50867	2.82564e-16	6.1512e-15
novel.612	-	PF16909:Vacuolar-sorting-associated 13 protein C-terminal|PF06650:SHR-binding domain of vacuolar-sorting associated protein 13|PF09333:Autophagy-related protein C terminal domain|PF16910:Repeating coiled region of VPS13	6.69052	2.88964e-16	6.27328e-15
110255404	LOC110255404	-	5.14923	2.97803e-16	6.45927e-15
100462748	ATG4C	autophagy related 4C cysteine peptidase%2C transcript variant X1	-1.42523	3.06161e-16	6.63452e-15
novel.4812	-	-	3.65712	3.14057e-16	6.79942e-15
100156100	C13H21orf62	chromosome 13 C21orf62 homolog%2C transcript variant X1	-2.79672	3.51869e-16	7.5973e-15
100233203	STARD4	StAR related lipid transfer domain containing 4%2C transcript variant X1	-1.0282	3.73886e-16	8.06535e-15
100624570	CYLD	CYLD lysine 63 deubiquitinase%2C transcript variant X3	1.02852	3.80092e-16	8.19179e-15
110260761	LOC110260761	uncharacterized LOC110260761	1.72542	3.88581e-16	8.35959e-15
100623749	KCTD13	potassium channel tetramerization domain containing 13%2C transcript variant X1	1.21007	4.5212e-16	9.69142e-15
100515702	TMLHE	trimethyllysine hydroxylase%2C epsilon%2C transcript variant X1	-1.05963	4.66461e-16	9.98982e-15
396775	TIMP3	TIMP metallopeptidase inhibitor 3	1.00688	6.39923e-16	1.36678e-14
110255190	LOC110255190	uncharacterized LOC110255190%2C transcript variant X1	-1.40694	6.8874e-16	1.46972e-14
novel.2801	-	PF08123:Histone methylation protein DOT1	1.56659	6.93562e-16	1.47869e-14
110257570	LOC110257570	TRPM8 channel-associated factor 2-like	1.1139	7.05631e-16	1.50172e-14
100152847	SKOR1	SKI family transcriptional corepressor 1	2.97676	7.29517e-16	1.55117e-14
100157165	TMOD2	tropomodulin 2%2C transcript variant X1	-1.13986	7.36995e-16	1.56567e-14
100623817	TBC1D30	TBC1 domain family member 30%2C transcript variant X1	-1.17788	7.63646e-16	1.62084e-14
100620451	HOXA10	homeobox A10%2C transcript variant X2	-1.55793	8.22531e-16	1.74426e-14
100157344	MUC4	mucin 4%2C cell surface associated	2.39512	8.57869e-16	1.81435e-14
100519989	EPHA1	EPH receptor A1	1.27019	8.80478e-16	1.86051e-14
106505545	LOC106505545	uncharacterized LOC106505545	1.01994	9.05731e-16	1.91217e-14
100156404	PGF	placental growth factor%2C transcript variant X2	-1.32579	9.90868e-16	2.0882e-14
novel.14984	-	-	3.12162	1.02305e-15	2.15411e-14
100151743	PPP1R18	protein phosphatase 1 regulatory subunit 18%2C transcript variant X4	1.5222	1.08002e-15	2.26804e-14
novel.18351	-	PF00429:ENV polyprotein (coat polyprotein)	-1.3533	1.09789e-15	2.30354e-14
novel.6802	-	-	-1.45526	1.18312e-15	2.47798e-14
106506339	LOC106506339	uncharacterized LOC106506339	1.59969	1.33638e-15	2.78915e-14
102160748	LOC102160748	uncharacterized LOC102160748	1.38072	1.34969e-15	2.81445e-14
novel.14986	-	-	3.24827	1.3872e-15	2.89015e-14
397681	APOA4	apolipoprotein A4	4.52274	1.44773e-15	3.01362e-14
novel.13072	-	-	1.49566	1.49969e-15	3.11904e-14
100626072	MMP25	matrix metallopeptidase 25	2.04818	1.52294e-15	3.16463e-14
110257100	SLC39A10	solute carrier family 39 member 10%2C transcript variant X2	-1.01973	1.53832e-15	3.19379e-14
396600	SLC1A4	solute carrier family 1 member 4%2C transcript variant X1	1.08645	1.54334e-15	3.20143e-14
100154530	TGM2	transglutaminase 2	2.68309	1.61949e-15	3.35646e-14
100525029	FAM111A	family with sequence similarity 111 member A	-1.10346	1.6803e-15	3.47945e-14
novel.8368	-	-	3.15638	1.79591e-15	3.70916e-14
100520444	C9H11orf70	chromosome 9 C11orf70 homolog%2C transcript variant X1	1.93843	2.01682e-15	4.15098e-14
novel.15993	-	-	2.78024	2.04981e-15	4.21523e-14
100737731	NAPEPLD	N-acyl phosphatidylethanolamine phospholipase D%2C transcript variant X5	-1.11593	2.10509e-15	4.32143e-14
100516327	TMEM144	transmembrane protein 144%2C transcript variant X2	-1.15746	2.19751e-15	4.50337e-14
100154587	KCNMB4	potassium calcium-activated channel subfamily M regulatory beta subunit 4	-1.0669	2.39084e-15	4.88694e-14
414836	FBN1	fibrillin 1	1.41813	2.41717e-15	4.93651e-14
110255519	LOC110255519	uncharacterized LOC110255519	2.05576	2.49926e-15	5.09978e-14
novel.17891	-	-	-1.21431	2.69044e-15	5.47579e-14
novel.16971	-	-	2.36223	2.88655e-15	5.86487e-14
102160867	ADAMTS17	ADAM metallopeptidase with thrombospondin type 1 motif 17%2C transcript variant X1	1.45691	3.06241e-15	6.21158e-14
100301483	S100A12	S100 calcium binding protein A12	-1.36897	3.21376e-15	6.50191e-14
novel.7011	-	PF16417:CCR4-NOT transcription complex subunit 1 TTP binding domain|PF16415:CCR4-NOT transcription complex subunit 1 CAF1-binding domain|PF04054:CCR4-Not complex component, Not1|PF12842:Domain of unknown function (DUF3819)	2.30763	3.37263e-15	6.81753e-14
100739122	ERICH5	glutamate rich 5%2C transcript variant X6	-1.19906	3.44956e-15	6.9612e-14
100521312	SWAP70	SWAP switching B-cell complex subunit 70	-1.50413	3.45726e-15	6.97083e-14
102165183	LOC102165183	-	3.89016	3.49181e-15	7.03453e-14
100302019	CLDN16	claudin 16%2C transcript variant X1	7.92785	3.65515e-15	7.35735e-14
novel.16531	-	-	-1.44718	3.79017e-15	7.61621e-14
novel.14138	-	PF00229:TNF(Tumour Necrosis Factor) family	4.00731	4.00786e-15	8.04007e-14
novel.5552	-	PF00066:LNR domain|PF12661:Human growth factor-like EGF|PF11936:Domain of unknown function (DUF3454)|PF00008:EGF-like domain|PF07684:NOTCH protein|PF06816:NOTCH protein|PF12796:Ankyrin repeats (3 copies)	2.96522	4.17395e-15	8.36619e-14
100521431	LOC100521431	zinc finger protein 791-like%2C transcript variant X3	1.12862	4.27821e-15	8.56073e-14
100154105	LOC100154105	kelch repeat and BTB domain-containing protein 6	-1.48834	4.64575e-15	9.28056e-14
406870	CP	ceruloplasmin%2C transcript variant X1	-1.56811	4.66938e-15	9.31994e-14
100152238	IFNGR1	interferon gamma receptor 1%2C transcript variant X1	-1.00282	4.93121e-15	9.82605e-14
novel.16950	-	PF00036:EF hand	1.11293	5.13389e-15	1.01957e-13
100519300	TGFBI	transforming growth factor beta induced	-1.06971	5.14857e-15	1.02163e-13
100510914	NEO1	neogenin 1%2C transcript variant X12	-1.05093	5.85467e-15	1.15981e-13
102160410	LOC102160410	atherin-like%2C transcript variant X16	-1.14393	5.86177e-15	1.16025e-13
406180	TNP2	transition protein 2	7.97207	5.89049e-15	1.16496e-13
novel.10142	-	PF00400:WD domain, G-beta repeat|PF12937:F-box-like	2.15794	6.66088e-15	1.31296e-13
100154314	SHPRH	SNF2 histone linker PHD RING helicase%2C transcript variant X4	-1.02923	6.89195e-15	1.35625e-13
novel.18995	-	-	1.90219	7.09512e-15	1.39508e-13
novel.2351	-	PF00962:Adenosine/AMP deaminase	1.62753	7.56035e-15	1.48533e-13
100620128	ZBTB21	zinc finger and BTB domain containing 21%2C transcript variant X2	1.10926	7.77555e-15	1.52635e-13
novel.11105	-	-	3.03141	8.19172e-15	1.60539e-13
100526207	SAAL1	serum amyloid A like 1%2C transcript variant X1	-1.07212	8.25584e-15	1.61662e-13
100517431	HOXD10	homeobox D10%2C transcript variant X1	-2.00495	8.33115e-15	1.63003e-13
110262303	L3HYPDH	trans-L-3-hydroxyproline dehydratase%2C transcript variant X3	-1.50852	8.4625e-15	1.65165e-13
100524161	PDGFD	platelet derived growth factor D	-2.53703	8.98952e-15	1.75163e-13
novel.5283	-	-	3.38427	9.22137e-15	1.79251e-13
novel.14853	-	-	7.83031	9.53526e-15	1.8519e-13
novel.5560	-	PF00907:T-box	-2.38982	1.04377e-14	2.02551e-13
110259991	TACR1	tachykinin receptor 1	-2.13738	1.06177e-14	2.05876e-13
100510887	LOC100510887	leucine-rich repeat extensin-like protein 2	-1.50178	1.0744e-14	2.07987e-13
novel.12576	-	PF00503:G-protein alpha subunit	2.56698	1.16568e-14	2.25107e-13
100738744	LOC100738744	histone H2B type 2-E	1.41627	1.16832e-14	2.25434e-13
novel.10873	-	-	3.17306	1.18007e-14	2.27515e-13
novel.16207	-	PF00063:Myosin head (motor domain)	1.75367	1.20457e-14	2.32051e-13
100155923	EFNA3	ephrin A3	-2.26265	1.22088e-14	2.35003e-13
novel.8654	-	-	3.94098	1.26683e-14	2.43649e-13
100621006	LOC100621006	RE1-silencing transcription factor-like%2C transcript variant X3	-1.09938	1.34857e-14	2.58743e-13
novel.345	-	-	2.36002	1.4556e-14	2.78603e-13
100515914	FLI1	Fli-1 proto-oncogene%2C ETS transcription factor%2C transcript variant X2	2.1282	1.46497e-14	2.79946e-13
100523409	CREBRF	CREB3 regulatory factor%2C transcript variant X1	1.3035	1.50155e-14	2.86706e-13
100524544	ABL1	ABL proto-oncogene 1%2C non-receptor tyrosine kinase%2C transcript variant X2	2.25585	1.52543e-14	2.90798e-13
100516532	KIAA0586	KIAA0586 ortholog	-1.58743	1.60577e-14	3.05623e-13
100523918	LMO7	LIM domain 7%2C transcript variant X1	1.56923	1.72778e-14	3.28058e-13
novel.12003	-	PF15509:Domain of unknown function (DUF4650)	2.12	1.80368e-14	3.4165e-13
novel.5453	-	-	4.51745	1.97186e-14	3.72912e-13
100524471	TBX20	T-box 20%2C transcript variant X2	1.04762	2.05154e-14	3.87364e-13
414381	CFLAR	CASP8 and FADD like apoptosis regulator%2C transcript variant X1	1.66421	2.08755e-14	3.93539e-13
rna78616	-	tRNA-Gly	-1.46894	2.12685e-14	4.00313e-13
100520347	TSPYL4	TSPY like 4	-1.25663	2.13126e-14	4.00825e-13
novel.12955	-	-	4.48969	2.13431e-14	4.01081e-13
102167710	FOXS1	forkhead box S1%2C transcript variant X4	5.87837	2.38792e-14	4.47678e-13
novel.11267	-	PF00053:Laminin EGF domain	-1.35168	2.45319e-14	4.5883e-13
100523197	SIDT2	SID1 transmembrane family member 2%2C transcript variant X4	3.68168	2.59295e-14	4.84588e-13
397094	IL1A	interleukin 1 alpha%2C transcript variant X1	-1.47674	2.63229e-14	4.91555e-13
100522166	TMEM37	transmembrane protein 37	-1.23622	2.67341e-14	4.98446e-13
100157904	WDFY4	WDFY family member 4	3.827	2.67549e-14	4.98446e-13
102160003	LOC102160003	uncharacterized LOC102160003	-1.95308	2.81619e-14	5.24248e-13
novel.13171	-	-	4.4433	2.82549e-14	5.25568e-13
100522450	ARHGAP24	Rho GTPase activating protein 24%2C transcript variant X4	-1.59932	2.84499e-14	5.28781e-13
novel.4158	-	PF00429:ENV polyprotein (coat polyprotein)	-1.23174	2.97203e-14	5.51101e-13
100516948	BRCC3	BRCA1/BRCA2-containing complex subunit 3%2C transcript variant X1	-1.08331	3.02618e-14	5.60704e-13
100627898	PER3	period circadian clock 3%2C transcript variant X1	-1.07328	3.04726e-14	5.64169e-13
novel.15321	-	-	2.89019	3.15427e-14	5.83528e-13
novel.6214	-	PF05029:Timeless protein C terminal region|PF04821:Timeless protein	-1.14845	3.47489e-14	6.41842e-13
novel.10384	-	-	2.27473	3.64571e-14	6.71827e-13
novel.9727	-	-	-1.38185	3.65509e-14	6.73035e-13
100739380	PARL	presenilin associated rhomboid like%2C transcript variant X3	-1.20237	3.71655e-14	6.83822e-13
100152137	CTIF	cap binding complex dependent translation initiation factor%2C transcript variant X7	2.31021	3.80642e-14	6.99816e-13
novel.13896	-	-	4.0957	3.86319e-14	7.09705e-13
novel.9548	-	PF01480:PWI domain	1.33028	4.26483e-14	7.8228e-13
110260108	LOC110260108	uncharacterized LOC110260108	1.69315	4.77987e-14	8.74727e-13
novel.2480	-	PF00620:RhoGAP domain|PF00063:Myosin head (motor domain)	3.06191	4.79803e-14	8.77375e-13
106505716	LOC106505716	uncharacterized LOC106505716	2.50851	4.95727e-14	9.05101e-13
100522582	SLC35F1	solute carrier family 35 member F1%2C transcript variant X1	-1.13855	4.99957e-14	9.12124e-13
396663	CCR7	C-C motif chemokine receptor 7	3.31653	5.15864e-14	9.39702e-13
100514413	GTPBP2	GTP binding protein 2%2C transcript variant X1	1.55913	5.44602e-14	9.90533e-13
novel.12022	-	PF00620:RhoGAP domain|PF01852:START domain	1.86269	5.56899e-14	1.01135e-12
100525187	SGPL1	sphingosine-1-phosphate lyase 1%2C transcript variant X7	-1.03565	5.69862e-14	1.03331e-12
110256137	RAI1	retinoic acid induced 1%2C transcript variant X5	1.70018	6.01146e-14	1.08921e-12
100516091	ZFYVE28	zinc finger FYVE-type containing 28%2C transcript variant X2	-1.20882	6.28976e-14	1.13779e-12
novel.16981	-	-	-1.31296	6.30377e-14	1.1387e-12
100522283	PCGF5	polycomb group ring finger 5%2C transcript variant X4	1.10586	6.48439e-14	1.17044e-12
novel.18719	-	PF00627:UBA/TS-N domain	-1.11685	6.50225e-14	1.17277e-12
493187	IL27	interleukin 27%2C transcript variant X1	4.7961	6.54518e-14	1.17962e-12
100156657	LOC100156657	uncharacterized LOC100156657%2C transcript variant X1	1.05966	7.21031e-14	1.29655e-12
110261008	LOC110261008	very-long-chain 3-oxoacyl-CoA reductase-B-like	-2.19199	7.32825e-14	1.31676e-12
novel.3687	-	PF00096:Zinc finger, C2H2 type	-1.66847	7.99894e-14	1.43402e-12
102160504	LOC102160504	uncharacterized LOC102160504	-2.14406	8.26692e-14	1.48094e-12
106507884	LOC106507884	uncharacterized LOC106507884	-2.43179	8.3087e-14	1.48731e-12
397311	KDR	kinase insert domain receptor%2C transcript variant X2	-2.82213	8.78191e-14	1.57083e-12
100156620	C14H10orf76	chromosome 14 C10orf76 homolog%2C transcript variant X1	-1.0224	9.02339e-14	1.61281e-12
396654	AHR	aryl hydrocarbon receptor	-1.15091	9.10708e-14	1.62533e-12
novel.17234	-	-	7.71942	9.1645e-14	1.63435e-12
novel.9910	-	-	2.31004	9.68243e-14	1.72542e-12
novel.1989	-	-	-1.60231	1.00126e-13	1.77893e-12
novel.6110	-	-	1.83987	1.01007e-13	1.79324e-12
100157660	SH3GL3	SH3 domain containing GRB2 like 3%2C endophilin A3%2C transcript variant X1	1.86604	1.01229e-13	1.79584e-12
100294687	TRIM40	tripartite motif containing 40%2C transcript variant X1	-3.09854	1.02443e-13	1.81601e-12
novel.1802	-	-	2.76028	1.05545e-13	1.86823e-12
novel.7624	-	PF00076:RNA recognition motif. (a.k.a. RRM, RBD, or RNP domain)	2.30836	1.12275e-13	1.97997e-12
397081	KCNN4	potassium calcium-activated channel subfamily N member 4	2.02345	1.14684e-13	2.01946e-12
100157120	NR4A2	nuclear receptor subfamily 4 group A member 2%2C transcript variant X4	2.49856	1.24662e-13	2.19028e-12
100513003	KIAA1549L	KIAA1549 like%2C transcript variant X2	-2.13582	1.26874e-13	2.22587e-12
100154157	METTL8	methyltransferase like 8%2C transcript variant X4	-1.05633	1.28485e-13	2.2517e-12
novel.10040	-	-	2.47733	1.30442e-13	2.28172e-12
100152572	MAP3K20	mitogen-activated protein kinase kinase kinase 20%2C transcript variant X1	-1.12798	1.31893e-13	2.30541e-12
100513679	NEK3	NIMA related kinase 3%2C transcript variant X10	-1.2146	1.37928e-13	2.40737e-12
100154982	CEP78	centrosomal protein 78%2C transcript variant X4	-1.04372	1.38523e-13	2.41597e-12
novel.17758	-	-	5.61105	1.39669e-13	2.43418e-12
novel.1898	-	-	4.97496	1.40733e-13	2.4491e-12
100134963	ATP5E	ATP synthase%2C H+ transporting%2C mitochondrial F1 complex%2C epsilon subunit%2C transcript variant X3	1.41016	1.47638e-13	2.56553e-12
100625457	RND2	Rho family GTPase 2%2C transcript variant X1	-1.12082	1.54488e-13	2.68261e-12
novel.9866	-	PF00271:Helicase conserved C-terminal domain|PF00270:DEAD/DEAH box helicase|PF04408:Helicase associated domain (HA2)	1.06166	1.58406e-13	2.74863e-12
100518179	FLT4	fms related tyrosine kinase 4	3.15916	1.67981e-13	2.91265e-12
novel.4794	-	-	-1.54793	1.8253e-13	3.14655e-12
novel.9741	-	-	-1.66942	1.85164e-13	3.18966e-12
novel.16045	-	-	2.47485	1.88825e-13	3.25036e-12
110260721	CASC1	cancer susceptibility 1%2C transcript variant X3	1.5452	1.89472e-13	3.25915e-12
novel.18151	-	-	1.58979	1.90176e-13	3.26888e-12
novel.16278	-	PF00169:PH domain|PF00788:Ras association (RalGDS/AF-6) domain	1.6637	2.06767e-13	3.54893e-12
novel.9698	-	-	1.8152	2.19483e-13	3.76176e-12
novel.18858	-	-	2.90632	2.31834e-13	3.96202e-12
100152613	IP6K3	inositol hexakisphosphate kinase 3%2C transcript variant X2	-1.58736	2.41303e-13	4.11791e-12
novel.13272	-	-	3.11082	2.42716e-13	4.13906e-12
100144496	RAB32	RAB32%2C member RAS oncogene family	-1.30209	2.4687e-13	4.20687e-12
110258061	NOTCH1	notch 1	1.21136	2.51719e-13	4.28643e-12
novel.2763	-	PF00069:Protein kinase domain	1.83015	2.75197e-13	4.67949e-12
397300	MTR	5-methyltetrahydrofolate-homocysteine methyltransferase%2C transcript variant X2	-1.23945	2.75392e-13	4.67949e-12
100511041	SMYD4	SET and MYND domain containing 4%2C transcript variant X4	-1.33237	2.81108e-13	4.76301e-12
novel.14414	-	PF13903:PMP-22/EMP/MP20/Claudin tight junction	1.5805	2.84945e-13	4.82458e-12
110261485	LOC110261485	-	2.65905	2.87017e-13	4.85621e-12
novel.1922	-	-	4.03252	3.00207e-13	5.07576e-12
100525716	FOXP1	forkhead box P1%2C transcript variant X4	1.54561	3.01617e-13	5.09597e-12
novel.6291	-	-	1.69401	3.02221e-13	5.10255e-12
100188905	SMARCA1	SWI/SNF related%2C matrix associated%2C actin dependent regulator of chromatin%2C subfamily a%2C member 1%2C transcript variant X2	-1.78774	3.15566e-13	5.32031e-12
100511399	COQ8A	coenzyme Q8A%2C transcript variant X1	-1.27241	3.27498e-13	5.51366e-12
novel.3220	-	PF00581:Rhodanese-like domain	-1.19872	3.41141e-13	5.73117e-12
novel.7789	-	PF00076:RNA recognition motif. (a.k.a. RRM, RBD, or RNP domain)	1.39383	3.44213e-13	5.77869e-12
novel.3936	-	PF02214:BTB/POZ domain	1.24723	3.67731e-13	6.15613e-12
100511473	BDH1	3-hydroxybutyrate dehydrogenase 1%2C transcript variant X2	-1.44297	3.89472e-13	6.50178e-12
novel.6182	-	-	2.66273	4.24006e-13	7.06835e-12
novel.9150	-	-	3.47657	4.32161e-13	7.19925e-12
110257437	TGIF2	TGFB induced factor homeobox 2%2C transcript variant X1	1.33627	4.45598e-13	7.4179e-12
100514957	ILDR2	immunoglobulin like domain containing receptor 2%2C transcript variant X7	3.6831	4.71287e-13	7.83456e-12
100522740	TMEM170A	transmembrane protein 170A%2C transcript variant X6	-1.03144	4.74931e-13	7.88412e-12
novel.1734	-	PF08919:F-actin binding	1.38415	5.15736e-13	8.54361e-12
106508139	LOC106508139	-	3.45495	5.27871e-13	8.73855e-12
100515587	NEMP2	nuclear envelope integral membrane protein 2%2C transcript variant X7	1.53206	5.41501e-13	8.95795e-12
novel.5173	-	-	4.79719	5.50904e-13	9.10716e-12
novel.2735	-	-	5.5066	6.32071e-13	1.04127e-11
100525553	DNAJB5	DnaJ heat shock protein family (Hsp40) member B5%2C transcript variant X1	1.36208	6.66753e-13	1.09765e-11
novel.9949	-	PF00017:SH2 domain|PF00018:SH3 domain|PF00169:PH domain|PF00779:BTK motif	1.79095	6.84519e-13	1.12612e-11
100519167	ZNF438	zinc finger protein 438%2C transcript variant X1	1.20245	6.94553e-13	1.14026e-11
novel.16842	-	PF00665:Integrase core domain|PF00078:Reverse transcriptase (RNA-dependent DNA polymerase)|PF00075:RNase H|PF00077:Retroviral aspartyl protease|PF09337:His(2)-Cys(2) zinc finger	-1.63511	7.1866e-13	1.17902e-11
100152239	NHS	NHS actin remodeling regulator%2C transcript variant X1	-1.06113	7.23172e-13	1.1856e-11
novel.18071	-	PF00676:Dehydrogenase E1 component	2.33823	7.51368e-13	1.23013e-11
novel.10765	-	PF00619:Caspase recruitment domain	1.21346	7.74321e-13	1.26678e-11
novel.14512	-	PF14604:Variant SH3 domain|PF00018:SH3 domain|PF12763:Cytoskeletal-regulatory complex EF hand|PF16617:Intersectin and clathrin adaptor AP2 binding region	1.00013	8.07501e-13	1.31931e-11
106507461	TMEM56	transmembrane protein 56%2C transcript variant X7	-1.3968	8.42087e-13	1.37487e-11
novel.14278	-	PF00094:von Willebrand factor type D domain|PF06119:Nidogen-like	4.38081	9.23108e-13	1.50508e-11
novel.13815	-	-	2.48036	9.29248e-13	1.51406e-11
novel.1188	-	-	3.48107	9.33687e-13	1.51921e-11
novel.1529	-	PF00615:Regulator of G protein signaling domain	1.79052	9.5579e-13	1.55304e-11
novel.6655	-	PF14744:WASH complex subunit 7|PF14745:WASH complex subunit 7, N-terminal	2.12773	9.72896e-13	1.57976e-11
novel.11779	-	-	1.16047	9.77921e-13	1.58684e-11
novel.8458	-	PF01237:Oxysterol-binding protein	2.42863	1.00692e-12	1.63166e-11
novel.16467	-	PF00025:ADP-ribosylation factor family	1.81794	1.10308e-12	1.78506e-11
100522503	PPAT	phosphoribosyl pyrophosphate amidotransferase	-1.1147	1.11177e-12	1.7979e-11
novel.16285	-	-	3.72245	1.18541e-12	1.91178e-11
106508256	LOC106508256	uncharacterized LOC106508256%2C transcript variant X3	-2.4755	1.19449e-12	1.92511e-11
100739680	RAB3IL1	RAB3A interacting protein like 1%2C transcript variant X1	-1.52655	1.23766e-12	1.99333e-11
100155975	LOC100155975	uncharacterized LOC100155975%2C transcript variant X1	1.53756	1.25395e-12	2.01821e-11
100152316	PAK5	p21 (RAC1) activated kinase 5%2C transcript variant X1	-1.33941	1.2567e-12	2.02126e-11
445512	HMOX1	heme oxygenase 1	-1.00656	1.31325e-12	2.10936e-11
100620394	COL15A1	collagen type XV alpha 1 chain	-1.89302	1.33686e-12	2.14584e-11
novel.77	-	PF00620:RhoGAP domain	1.75232	1.36172e-12	2.1828e-11
110255408	LOC110255408	uncharacterized LOC110255408	1.41138	1.48244e-12	2.37151e-11
novel.15931	-	PF00615:Regulator of G protein signaling domain|PF08628:Sorting nexin C terminal|PF00787:PX domain	1.06872	1.49951e-12	2.39721e-11
102162416	FAM217B	family with sequence similarity 217 member B%2C transcript variant X1	-1.46396	1.5583e-12	2.48952e-11
novel.6358	-	-	7.70274	1.56471e-12	2.49808e-11
novel.554	-	PF03166:MH2 domain	3.06337	1.63176e-12	2.60163e-11
novel.5646	-	PF05337:Macrophage colony stimulating factor-1 (CSF-1)	1.06659	1.66396e-12	2.6494e-11
novel.10712	-	-	7.57237	1.66757e-12	2.65338e-11
novel.9683	-	-	3.72838	1.8115e-12	2.87662e-11
100153584	SMAD9	SMAD family member 9	1.21523	1.81354e-12	2.87794e-11
100153608	CBR4	carbonyl reductase 4%2C transcript variant X1	-1.00788	1.83106e-12	2.90186e-11
100519708	SH2B2	SH2B adaptor protein 2%2C transcript variant X1	1.56486	1.94586e-12	3.08174e-11
100144490	IGFBP4	insulin like growth factor binding protein 4	1.83909	1.95687e-12	3.09712e-11
100127149	CBLN3	cerebellin 3 precursor	2.35457	2.05561e-12	3.25122e-11
novel.1187	-	PF00929:Exonuclease	2.83833	2.21771e-12	3.50295e-11
100524747	DBP	D-box binding PAR bZIP transcription factor%2C transcript variant X2	-1.67033	2.3221e-12	3.6654e-11
503658	ENPP2	ectonucleotide pyrophosphatase/phosphodiesterase 2%2C transcript variant X5	-1.04183	2.36736e-12	3.73436e-11
100620380	CEP19	centrosomal protein 19%2C transcript variant X3	-1.37869	2.48211e-12	3.91277e-11
novel.4086	-	-	-1.67319	2.73684e-12	4.30301e-11
novel.14732	-	PF00571:CBS domain|PF00654:Voltage gated chloride channel	1.44751	2.7685e-12	4.34982e-11
100154630	HJURP	Holliday junction recognition protein	-1.20919	3.07487e-12	4.81844e-11
novel.9167	-	-	1.60153	3.09321e-12	4.844e-11
novel.17616	-	-	1.0892	3.12007e-12	4.87642e-11
397126	PTGFR	prostaglandin F receptor%2C transcript variant X1	-1.62005	3.17974e-12	4.9664e-11
novel.3969	-	-	1.54605	3.19044e-12	4.97986e-11
664651	SUV39H2	suppressor of variegation 3-9 homolog 2%2C transcript variant X1	1.09468	3.21915e-12	5.02137e-11
novel.4661	-	-	1.24755	3.25005e-12	5.06625e-11
100622680	BBS12	Bardet-Biedl syndrome 12%2C transcript variant X3	-1.18222	3.30735e-12	5.14882e-11
novel.4157	-	-	-1.62666	3.40127e-12	5.28464e-11
novel.17508	-	PF04664:Opioid growth factor receptor (OGFr) conserved region	1.3711	3.53468e-12	5.48118e-11
100620188	LOC100620188	zinc finger protein 396%2C transcript variant X1	-1.14822	3.785e-12	5.85027e-11
110262164	LOC110262164	-	4.38658	3.87807e-12	5.98633e-11
100144410	TPPP	tubulin polymerization promoting protein%2C transcript variant X1	1.21963	4.02626e-12	6.20702e-11
397520	ANPEP	alanyl aminopeptidase%2C membrane%2C transcript variant X3	1.93837	4.15863e-12	6.40693e-11
novel.17864	-	-	3.24259	4.16314e-12	6.40973e-11
novel.17975	-	-	-1.31878	4.36021e-12	6.7088e-11
397535	ABCC2	ATP binding cassette subfamily C member 2	1.64251	4.38511e-12	6.74275e-11
novel.13700	-	PF00788:Ras association (RalGDS/AF-6) domain	1.42141	4.88354e-12	7.4946e-11
100510937	HCN1	hyperpolarization activated cyclic nucleotide gated potassium channel 1%2C transcript variant X1	3.53336	4.91947e-12	7.54488e-11
100623558	RWDD2B	RWD domain containing 2B%2C transcript variant X1	-1.01856	5.27508e-12	8.06945e-11
novel.14032	-	-	7.50708	5.32917e-12	8.14695e-11
100626514	CHST2	carbohydrate sulfotransferase 2	2.0083	5.41019e-12	8.26549e-11
100625525	SENP8	SUMO/sentrin peptidase family member%2C NEDD8 specific	-1.15085	5.50822e-12	8.40985e-11
novel.14275	-	PF11555:EGFR receptor inhibitor Mig-6	1.21029	5.83694e-12	8.9003e-11
novel.11870	-	-	2.64308	5.97722e-12	9.10836e-11
100738665	DOT1L	DOT1 like histone lysine methyltransferase%2C transcript variant X2	1.47036	6.16403e-12	9.38701e-11
novel.5180	-	-	-1.3848	6.48485e-12	9.86295e-11
novel.8360	-	-	2.3623	6.61477e-12	1.00477e-10
novel.3015	-	PF00018:SH3 domain|PF00017:SH2 domain	1.54349	7.27222e-12	1.10252e-10
100337669	FZD2	frizzled class receptor 2	-2.74441	7.50882e-12	1.13549e-10
100517235	MTPAP	mitochondrial poly(A) polymerase%2C transcript variant X2	1.78873	7.5203e-12	1.13635e-10
100620123	PCDH10	protocadherin 10	2.09682	7.91936e-12	1.19454e-10
novel.15554	-	PF12403:Paired-box protein 2 C terminal|PF00292:'Paired box' domain	1.10055	8.46618e-12	1.27459e-10
100101472	AMPD1	adenosine monophosphate deaminase 1%2C transcript variant X3	3.52871	8.50011e-12	1.27889e-10
novel.1966	-	-	1.62652	9.06435e-12	1.35777e-10
100519468	TNFSF14	TNF superfamily member 14%2C transcript variant X1	-5.74876	9.39163e-12	1.40502e-10
100624928	SPICE1	spindle and centriole associated protein 1%2C transcript variant X1	-1.29458	9.5437e-12	1.42508e-10
novel.8146	-	-	2.1959	9.65493e-12	1.44079e-10
novel.17393	-	-	2.7487	9.79188e-12	1.46031e-10
novel.7653	-	-	1.84724	1.00344e-11	1.49554e-10
novel.10005	-	PF00160:Cyclophilin type peptidyl-prolyl cis-trans isomerase/CLD	1.72701	1.02943e-11	1.53331e-10
397372	GHSR	growth hormone secretagogue receptor%2C transcript variant X1	2.12895	1.04869e-11	1.56004e-10
102163220	ASPRV1	aspartic peptidase%2C retroviral-like 1%2C transcript variant X6	1.72767	1.06687e-11	1.5861e-10
novel.422	-	-	3.90103	1.07452e-11	1.59647e-10
497237	SCG2	secretogranin II	7.47442	1.1161e-11	1.65721e-10
100514180	PAN3	PAN3 poly(A) specific ribonuclease subunit%2C transcript variant X2	1.9989	1.11996e-11	1.66191e-10
novel.1785	-	-	-1.37233	1.1812e-11	1.74732e-10
novel.1069	-	PF00025:ADP-ribosylation factor family	3.2013	1.20449e-11	1.78067e-10
novel.13076	-	PF13716:Divergent CRAL/TRIO domain|PF00616:GTPase-activator protein for Ras-like GTPase	5.66813	1.22957e-11	1.81549e-10
100156210	ETV7	ETS variant 7%2C transcript variant X2	2.13999	1.24752e-11	1.84084e-10
novel.17109	-	-	5.43	1.25488e-11	1.85056e-10
100627600	GALNT5	polypeptide N-acetylgalactosaminyltransferase 5%2C transcript variant X2	2.77068	1.32457e-11	1.94971e-10
novel.11001	-	-	2.17954	1.36074e-11	2.00047e-10
novel.10244	-	-	-2.2629	1.51298e-11	2.21879e-10
397382	MUC1	mucin 1%2C cell surface associated%2C transcript variant X3	1.79672	1.54146e-11	2.25917e-10
106505478	LOC106505478	uncharacterized LOC106505478%2C transcript variant X3	3.85254	1.63913e-11	2.39787e-10
novel.15574	-	PF07555:beta-N-acetylglucosaminidase	1.21069	1.66109e-11	2.4285e-10
100151982	CHDH	choline dehydrogenase%2C transcript variant X2	-1.62269	1.67215e-11	2.44317e-10
102166572	LOC102166572	-	2.98892	1.67897e-11	2.45091e-10
novel.16244	-	-	2.98043	1.67951e-11	2.45091e-10
100511691	ANKRD35	ankyrin repeat domain 35%2C transcript variant X2	2.55767	1.80816e-11	2.6338e-10
novel.17174	-	PF00665:Integrase core domain|PF09337:His(2)-Cys(2) zinc finger	-1.67065	1.8522e-11	2.69629e-10
100525651	WDR19	WD repeat domain 19%2C transcript variant X2	-1.03156	1.90662e-11	2.77213e-10
novel.11940	-	-	4.20394	1.94187e-11	2.82165e-10
novel.10477	-	-	-1.68718	1.97439e-11	2.8654e-10
100154535	SPRN	shadow of prion protein	-1.49481	2.07444e-11	3.00144e-10
100135674	SGCB	sarcoglycan beta	-1.41708	2.09712e-11	3.03056e-10
100514366	PROCA1	protein interacting with cyclin A1%2C transcript variant X2	2.24353	2.15582e-11	3.11349e-10
100125972	SERPINC1	serpin family C member 1	2.6639	2.26504e-11	3.26528e-10
novel.1003	-	-	2.60783	2.27283e-11	3.27255e-10
novel.12539	-	-	7.43461	2.32502e-11	3.34363e-10
110260202	ARC	activity regulated cytoskeleton associated protein	2.42827	2.46537e-11	3.53905e-10
novel.5822	-	-	2.49192	2.63072e-11	3.77187e-10
novel.5611	-	-	4.73429	2.63927e-11	3.78183e-10
100523714	PIP5KL1	phosphatidylinositol-4-phosphate 5-kinase like 1	3.04228	2.64952e-11	3.79424e-10
novel.11899	-	-	5.43478	2.74941e-11	3.93018e-10
100517862	UBE2F	ubiquitin conjugating enzyme E2 F (putative)%2C transcript variant X6	1.25954	2.94835e-11	4.20445e-10
100622240	TSPAN5	tetraspanin 5%2C transcript variant X3	2.96671	2.95775e-11	4.21532e-10
novel.327	-	-	-1.4925	2.99689e-11	4.26855e-10
100525302	EVI2A	ecotropic viral integration site 2A	5.05744	3.06258e-11	4.35951e-10
100520731	ZNF174	zinc finger protein 174	-1.03111	3.12124e-11	4.43503e-10
novel.16415	-	PF14719:Phosphotyrosine interaction domain (PTB/PID)	-2.19368	3.13913e-11	4.45779e-10
novel.5144	-	-	2.49386	3.32736e-11	4.71664e-10
novel.12707	-	PF07334:Interferon-induced 35 kDa protein (IFP 35) N-terminus|PF07292:Nmi/IFP 35 domain (NID)	3.92554	3.49669e-11	4.94782e-10
novel.4848	-	-	2.92071	3.57257e-11	5.05218e-10
100153642	ANKRD37	ankyrin repeat domain 37%2C transcript variant X2	1.0081	3.71502e-11	5.23805e-10
novel.16301	-	PF01534:Frizzled/Smoothened family membrane region|PF01392:Fz domain	1.38132	3.8312e-11	5.39545e-10
novel.3847	-	-	-1.30511	4.05443e-11	5.70308e-10
novel.17574	-	-	5.32912	4.09474e-11	5.74618e-10
novel.16957	-	-	-2.86745	4.34329e-11	6.08897e-10
100525123	STOML3	stomatin like 3%2C transcript variant X7	1.54593	4.34414e-11	6.08897e-10
110257314	LOC110257314	uncharacterized LOC110257314	1.41707	4.77061e-11	6.66707e-10
106509464	PRTN3	proteinase 3	2.03375	4.80232e-11	6.7035e-10
100624543	P4HA3	prolyl 4-hydroxylase subunit alpha 3%2C transcript variant X3	-1.13431	4.81001e-11	6.7103e-10
397495	BDNF	brain derived neurotrophic factor%2C transcript variant X1	3.63458	4.9735e-11	6.92213e-10
110255500	LOC110255500	uncharacterized LOC110255500	2.31465	5.03002e-11	6.99261e-10
novel.4782	-	-	-1.62775	5.26889e-11	7.30759e-10
novel.16256	-	-	1.48932	5.46002e-11	7.56385e-10
100521651	POLE2	DNA polymerase epsilon 2%2C accessory subunit%2C transcript variant X1	-2.02774	5.49404e-11	7.60655e-10
novel.7698	-	-	1.30823	5.62081e-11	7.77753e-10
novel.4679	-	-	2.67644	5.70937e-11	7.89087e-10
100517132	ZNF609	zinc finger protein 609%2C transcript variant X3	-1.07256	6.13451e-11	8.4588e-10
100520385	MON1B	MON1 homolog B%2C secretory trafficking associated%2C transcript variant X1	-1.00283	6.19593e-11	8.53853e-10
110257399	SRMS	src-related kinase lacking C-terminal regulatory tyrosine and N-terminal myristylation sites	3.30639	6.28482e-11	8.65601e-10
100625448	FUK	fucokinase%2C transcript variant X3	-1.03093	6.40211e-11	8.81245e-10
novel.879	-	-	2.3494	6.74681e-11	9.27081e-10
106510091	SPIDR	scaffolding protein involved in DNA repair%2C transcript variant X1	-2.44493	6.93367e-11	9.52208e-10
novel.18530	-	-	3.85254	7.01206e-11	9.62236e-10
novel.17750	-	PF00001:7 transmembrane receptor (rhodopsin family)	7.49192	7.04273e-11	9.65512e-10
novel.15323	-	PF00089:Trypsin	2.05769	7.89044e-11	1.078e-09
100533540	BRD4	bromodomain containing 4%2C transcript variant X6	1.28195	8.75029e-11	1.19341e-09
novel.7364	-	PF00554:Rel homology DNA-binding domain|PF16181:RelB transactivation domain|PF16179:Rel homology dimerisation domain|PF16180:RelB leucine zipper	1.27489	9.2116e-11	1.25489e-09
396755	INSR	insulin receptor%2C transcript variant X1	-1.13391	9.47717e-11	1.29033e-09
397057	IL18	interleukin 18%2C transcript variant X1	-1.0945	9.58853e-11	1.304e-09
100512824	PACSIN3	protein kinase C and casein kinase substrate in neurons 3%2C transcript variant X10	-1.05639	9.7026e-11	1.318e-09
100514960	SYPL2	synaptophysin like 2%2C transcript variant X1	3.23053	9.74697e-11	1.32327e-09
novel.8632	-	-	2.97081	1.02215e-10	1.38533e-09
102167816	GUCA1B	guanylate cyclase activator 1B	7.36027	1.09622e-10	1.48233e-09
novel.11338	-	PF00617:RasGEF domain	1.96089	1.20669e-10	1.62615e-09
novel.10057	-	-	5.5883	1.2293e-10	1.65289e-09
110261174	METTL4	methyltransferase like 4%2C transcript variant X5	-1.47927	1.23054e-10	1.65362e-09
100155305	EXTL2	exostosin like glycosyltransferase 2%2C transcript variant X1	-1.04877	1.23945e-10	1.6637e-09
100624829	APH1B	aph-1 homolog B%2C gamma-secretase subunit%2C transcript variant X1	-1.07365	1.27802e-10	1.71287e-09
novel.6668	-	-	4.14503	1.2847e-10	1.71958e-09
100621538	LOC100621538	histone H2A type 3%2C transcript variant X2	2.52928	1.31289e-10	1.75337e-09
novel.6113	-	PF16208:Keratin type II head|PF00038:Intermediate filament protein	2.02841	1.31521e-10	1.75548e-09
novel.10616	-	-	-1.73125	1.4006e-10	1.86318e-09
novel.10107	-	-	-3.44387	1.42128e-10	1.88858e-09
100627249	NMT2	N-myristoyltransferase 2%2C transcript variant X2	-1.28888	1.43074e-10	1.90009e-09
novel.14175	-	-	7.32847	1.43207e-10	1.90079e-09
novel.3082	-	-	2.99621	1.44275e-10	1.91389e-09
100623299	IL22RA1	interleukin 22 receptor subunit alpha 1	1.46001	1.47618e-10	1.95716e-09
novel.2591	-	PF15135:Uncharacterised protein UPF0515	4.2769	1.49131e-10	1.97501e-09
100156965	SRRM4	serine/arginine repetitive matrix 4%2C transcript variant X2	2.1503	1.65985e-10	2.18846e-09
100157309	ISLR2	immunoglobulin superfamily containing leucine rich repeat 2%2C transcript variant X1	4.5726	1.68802e-10	2.22313e-09
100512459	NUDT12	nudix hydrolase 12%2C transcript variant X1	-1.01005	1.7267e-10	2.27156e-09
102160869	LOC102160869	atherin-like%2C transcript variant X2	2.02893	1.74522e-10	2.29465e-09
novel.10271	-	PF12796:Ankyrin repeats (3 copies)|PF00791:ZU5 domain|PF13637:Ankyrin repeats (many copies)|PF13857:Ankyrin repeats (many copies)	-1.45345	1.75628e-10	2.30793e-09
100521659	LOC100521659	cytochrome P450 26B1	2.47301	1.76e-10	2.31154e-09
100620398	SEMA3A	semaphorin 3A%2C transcript variant X3	4.03206	1.84191e-10	2.41777e-09
novel.18141	-	-	7.81791	1.84376e-10	2.41886e-09
100628001	MARCKSL1	MARCKS like 1	5.37909	1.85327e-10	2.42866e-09
100310804	IFN-ALPHA-14	interferon-alpha-14	7.35739	1.86297e-10	2.44003e-09
100623441	LOC100623441	sulfotransferase 1C4%2C transcript variant X2	2.06835	1.87909e-10	2.45843e-09
novel.17310	-	-	1.81561	1.90823e-10	2.49519e-09
100525721	LOC100525721	dual specificity protein phosphatase 15	1.95282	1.92617e-10	2.51726e-09
novel.7016	-	-	2.37761	1.94773e-10	2.54124e-09
100513135	SLC15A3	solute carrier family 15 member 3	2.52921	2.12266e-10	2.76341e-09
100737369	LOC100737369	-	4.15344	2.1735e-10	2.8265e-09
novel.4243	-	-	5.27893	2.21915e-10	2.87956e-09
100511110	FEZF1	FEZ family zinc finger 1%2C transcript variant X1	-1.88263	2.23554e-10	2.89924e-09
100157521	ACSL5	acyl-CoA synthetase long-chain family member 5%2C transcript variant X3	1.1233	2.35385e-10	3.05102e-09
100516791	RAB26	RAB26%2C member RAS oncogene family	3.04939	2.38975e-10	3.09586e-09
novel.9067	-	-	7.28907	2.45761e-10	3.18032e-09
808505	ATP8	-	-1.52999	2.51695e-10	3.25179e-09
novel.12219	-	-	7.45217	2.61017e-10	3.36491e-09
100155513	HNRNPH3	heterogeneous nuclear ribonucleoprotein H3%2C transcript variant X6	2.60999	2.65378e-10	3.41743e-09
100525230	LURAP1	leucine rich adaptor protein 1	-1.24541	2.67092e-10	3.43645e-09
novel.6569	-	-	1.66668	2.75513e-10	3.54026e-09
100520839	CLEC2B	C-type lectin domain family 2%2C member B	2.93475	2.76099e-10	3.54404e-09
397115	ARG1	arginase 1%2C transcript variant X4	-1.54479	2.77656e-10	3.5601e-09
100155578	DAPK2	death associated protein kinase 2%2C transcript variant X3	1.17657	2.80188e-10	3.58959e-09
novel.9168	-	-	2.19116	2.80257e-10	3.58959e-09
100515340	LOC100515340	uncharacterized LOC100515340%2C transcript variant X4	-1.03141	2.84747e-10	3.64513e-09
novel.8693	-	-	1.47449	2.87037e-10	3.67247e-09
397053	IL12A	interleukin 12A	2.68279	2.88161e-10	3.68348e-09
110259259	SMTNL1	smoothelin like 1	7.29135	2.88208e-10	3.68348e-09
102166801	LOC102166801	NKG2D ligand 1-like	-1.07405	2.99583e-10	3.82269e-09
novel.17251	-	PF00632:HECT-domain (ubiquitin-transferase)	1.98115	3.05796e-10	3.89988e-09
100514454	CCDC88A	coiled-coil domain containing 88A%2C transcript variant X1	-1.23323	3.15289e-10	4.01664e-09
novel.15121	-	PF09453:HIRA B motif|PF07569:TUP1-like enhancer of split	1.85348	3.26639e-10	4.15455e-09
novel.228	-	-	1.16084	3.27149e-10	4.15881e-09
100737623	MYO7B	myosin VIIB%2C transcript variant X1	1.4041	3.28191e-10	4.16983e-09
novel.15939	-	PF13855:Leucine rich repeat	1.10329	3.41869e-10	4.3413e-09
100523418	RFX3	regulatory factor X3%2C transcript variant X3	1.00534	3.5183e-10	4.46056e-09
100156984	ZC3H12D	zinc finger CCCH-type containing 12D%2C transcript variant X1	-2.07316	3.52011e-10	4.46056e-09
novel.11748	-	-	7.28434	3.71207e-10	4.6913e-09
396593	PLA2G7	phospholipase A2 group VII%2C transcript variant 2	-1.1159	3.75622e-10	4.74205e-09
100233199	PITPNC1	phosphatidylinositol transfer protein%2C cytoplasmic 1%2C transcript variant X2	-1.33034	3.7658e-10	4.75163e-09
100625500	STAC	SH3 and cysteine rich domain	-1.31806	3.95193e-10	4.98119e-09
100134950	PNISR	PNN interacting serine and arginine rich protein%2C transcript variant X1	1.41917	4.02394e-10	5.06927e-09
novel.8472	-	-	5.16649	4.02678e-10	5.07016e-09
novel.10395	-	PF03184:DDE superfamily endonuclease|PF03221:Tc5 transposase DNA-binding domain|PF04218:CENP-B N-terminal DNA-binding domain	-2.64328	4.25529e-10	5.35221e-09
397686	IFNA1	interferon%2C alpha 1	3.48269	4.27994e-10	5.38037e-09
396687	LEAP2	liver enriched antimicrobial peptide 2	7.2486	4.39367e-10	5.52041e-09
100158219	FAM26F	family with sequence similarity 26 member F	3.41398	4.42529e-10	5.55721e-09
100736901	ATP13A3	ATPase 13A3%2C transcript variant X1	2.62025	4.46322e-10	5.60189e-09
novel.17332	-	-	1.46104	5.05179e-10	6.33058e-09
novel.2142	-	-	-1.52463	5.08972e-10	6.37476e-09
novel.10844	-	-	1.4862	5.20799e-10	6.51602e-09
100524629	DRAXIN	dorsal inhibitory axon guidance protein	1.42031	5.21837e-10	6.52557e-09
novel.16039	-	PF01429:Methyl-CpG binding domain|PF02791:DDT domain|PF15613:Williams-Beuren syndrome DDT (WSD), D-TOX E motif	1.04365	5.23297e-10	6.54038e-09
rna78604	-	tRNA-Leu	-1.25779	5.28364e-10	6.60024e-09
novel.17659	-	-	1.00327	5.36253e-10	6.69528e-09
novel.7715	-	PF14604:Variant SH3 domain|PF00621:RhoGEF domain|PF00169:PH domain	1.17863	5.39748e-10	6.73537e-09
novel.15987	-	-	3.42154	5.5362e-10	6.90124e-09
100153985	SIX4	SIX homeobox 4	-1.01966	5.63206e-10	7.01705e-09
novel.54	-	-	-1.13792	5.76228e-10	7.17177e-09
100153506	PISD	phosphatidylserine decarboxylase%2C transcript variant X2	2.39605	5.9562e-10	7.39377e-09
novel.4975	-	-	-1.22642	6.03243e-10	7.4767e-09
novel.18585	-	PF01840:TCL1/MTCP1 family	-1.52402	6.17346e-10	7.63556e-09
100154222	EPHA7	EPH receptor A7%2C transcript variant X4	-1.78839	6.27733e-10	7.75596e-09
novel.9930	-	PF00412:LIM domain	3.07957	6.53518e-10	8.05362e-09
novel.6840	-	-	-1.11997	6.80421e-10	8.38081e-09
100101921	SLC9A2	solute carrier family 9 member A2	1.04568	6.82231e-10	8.39875e-09
110261344	LOC110261344	uncharacterized LOC110261344	2.30958	6.93698e-10	8.53109e-09
novel.16976	-	PF02994:L1 transposable element RBD-like domain	1.00137	7.01617e-10	8.62401e-09
100523160	DCX	doublecortin%2C transcript variant X6	-1.30408	7.81148e-10	9.57631e-09
100154567	NUP43	nucleoporin 43%2C transcript variant X1	-1.06077	7.84564e-10	9.60879e-09
novel.9575	-	-	5.12992	7.91871e-10	9.6883e-09
100302538	TRIM21	tripartite motif containing 21%2C transcript variant X1	3.44179	7.94821e-10	9.7168e-09
novel.7472	-	PF00169:PH domain	3.44179	7.96247e-10	9.72681e-09
novel.8018	-	-	3.14789	8.86513e-10	1.07907e-08
novel.17568	-	-	3.09259	8.93401e-10	1.08689e-08
novel.1888	-	-	1.74188	8.99509e-10	1.09265e-08
novel.3571	-	PF15229:POM121 family	2.04581	9.52994e-10	1.15585e-08
novel.16405	-	PF00169:PH domain|PF02174:PTB domain (IRS-1 type)	1.02904	9.59987e-10	1.16373e-08
novel.1106	-	-	2.90802	1.03861e-09	1.25584e-08
novel.3876	-	-	2.92836	1.06111e-09	1.28174e-08
novel.6013	-	-	-2.55812	1.06869e-09	1.29025e-08
397665	PCBP2	poly(rC) binding protein 2%2C transcript variant X29	1.71612	1.16278e-09	1.401e-08
novel.6627	-	-	-1.17408	1.24574e-09	1.4964e-08
novel.17318	-	-	1.22823	1.3414e-09	1.60806e-08
100522131	FKBP1B	FK506 binding protein 1B%2C transcript variant X3	-1.41366	1.3751e-09	1.64596e-08
100154053	LOC100154053	SLAM family member 7%2C transcript variant X2	4.07193	1.43268e-09	1.71144e-08
novel.862	-	PF05679:Chondroitin N-acetylgalactosaminyltransferase	1.75298	1.46514e-09	1.74685e-08
100625859	TET1	tet methylcytosine dioxygenase 1	-2.20598	1.46672e-09	1.74771e-08
novel.4480	-	PF00618:RasGEF N-terminal motif|PF00617:RasGEF domain|PF00169:PH domain	1.02839	1.46984e-09	1.75055e-08
100217377	C1QTNF1	C1q and TNF related 1%2C transcript variant X2	-2.55462	1.49891e-09	1.78428e-08
100157134	ZNF704	zinc finger protein 704	-1.56043	1.55515e-09	1.84568e-08
100524640	PCLO	piccolo presynaptic cytomatrix protein	-1.02315	1.66328e-09	1.96714e-08
106510533	ZNF260	zinc finger protein 260%2C transcript variant X2	-1.13677	1.67727e-09	1.9827e-08
100516411	TBC1D8B	TBC1 domain family member 8B	-1.37541	1.73247e-09	2.04592e-08
100512817	TENM3	teneurin transmembrane protein 3%2C transcript variant X2	-3.58889	1.73458e-09	2.04739e-08
novel.18514	-	PF05641:Agenet domain|PF12235:Fragile X-related 1 protein core C terminal|PF00013:KH domain	1.18799	1.79127e-09	2.11325e-08
novel.15862	-	PF09379:FERM N-terminal domain|PF00373:FERM central domain	-1.44434	1.79882e-09	2.12111e-08
100154311	TCHHL1	trichohyalin like 1%2C transcript variant X2	7.16386	1.85379e-09	2.18484e-08
novel.18148	-	-	5.14271	1.86981e-09	2.20263e-08
110255520	LOC110255520	uncharacterized LOC110255520	5.14271	1.87166e-09	2.20372e-08
414851	MGAT4C	MGAT4 family member C	-1.75367	1.89274e-09	2.22634e-08
novel.3089	-	PF08736:FERM adjacent (FA)|PF09380:FERM C-terminal PH-like domain|PF09379:FERM N-terminal domain|PF00373:FERM central domain	2.17866	1.89382e-09	2.2265e-08
100518963	TOGARAM2	TOG array regulator of axonemal microtubules 2	1.44396	2.00017e-09	2.34805e-08
100523468	FAM43A	family with sequence similarity 43 member A	1.08025	2.02505e-09	2.37374e-08
novel.17721	-	-	3.0362	2.05448e-09	2.40586e-08
100620623	SPOCK1	SPARC/osteonectin%2C cwcv and kazal like domains proteoglycan 1%2C transcript variant X2	-1.62473	2.07859e-09	2.4329e-08
novel.5077	-	PF06979:Assembly, mitochondrial proton-transport ATP synth complex	-1.54244	2.12861e-09	2.48412e-08
100517644	ZC3H7A	zinc finger CCCH-type containing 7A%2C transcript variant X1	2.62824	2.19355e-09	2.55739e-08
novel.7382	-	PF00170:bZIP transcription factor	-1.52298	2.20366e-09	2.56791e-08
novel.8035	-	PF02063:MARCKS family	5.05824	2.2385e-09	2.60485e-08
110262219	LOC110262219	uncharacterized LOC110262219	3.54878	2.23864e-09	2.60485e-08
novel.15167	-	-	5.05687	2.24308e-09	2.60873e-08
100037944	CHI3L2	chitinase 3 like 2	-2.55274	2.30501e-09	2.67945e-08
novel.8545	-	PF10232:Mediator of RNA polymerase II transcription complex subunit 8	1.03764	2.3339e-09	2.70906e-08
novel.7695	-	PF00069:Protein kinase domain	1.3258	2.44701e-09	2.83343e-08
novel.10161	-	-	-1.22197	2.55179e-09	2.95045e-08
novel.166	-	-	2.61981	2.61975e-09	3.02314e-08
novel.12785	-	-	2.94951	2.73288e-09	3.1491e-08
106507734	LOC106507734	uncharacterized LOC106507734%2C transcript variant X2	2.73451	2.83741e-09	3.26797e-08
100511843	LCP2	lymphocyte cytosolic protein 2%2C transcript variant X1	3.74057	2.86654e-09	3.29832e-08
100519953	GTF2A1L	general transcription factor IIA subunit 1 like%2C transcript variant X2	-2.99467	2.93744e-09	3.37664e-08
novel.10392	-	-	1.87495	3.08363e-09	3.53443e-08
110256302	LOC110256302	uncharacterized LOC110256302	3.3018	3.19822e-09	3.66047e-08
100154248	IFIT3	interferon induced protein with tetratricopeptide repeats 3%2C transcript variant X1	2.63312	3.24703e-09	3.71277e-08
novel.16551	-	PF00063:Myosin head (motor domain)|PF00373:FERM central domain|PF00169:PH domain|PF16735:Unconventional myosin-X coiled coil domain|PF00784:MyTH4 domain	-1.99969	3.28115e-09	3.74998e-08
110255999	PTGES3L	prostaglandin E synthase 3 like%2C transcript variant X1	-1.04617	3.35745e-09	3.82797e-08
100737075	SP9	Sp9 transcription factor	-1.60389	3.56177e-09	4.03962e-08
110259399	FOXD1	forkhead box D1	-1.3769	3.66434e-09	4.15199e-08
100515041	PDLIM5	PDZ and LIM domain 5%2C transcript variant X10	2.87641	3.68781e-09	4.17659e-08
novel.18199	-	PF00069:Protein kinase domain	-1.60801	3.71783e-09	4.20659e-08
106508499	LOC106508499	uncharacterized LOC106508499%2C transcript variant X1	2.50347	3.8316e-09	4.32707e-08
novel.1139	-	-	2.83417	3.95167e-09	4.4542e-08
novel.18800	-	PF15796:KELK-motif containing domain of MRCK Ser/Thr protein kinase|PF08826:DMPK coiled coil domain like	1.06616	3.99485e-09	4.50073e-08
100144620	AQP10	aquaporin 10%2C transcript variant X1	4.32513	4.01208e-09	4.51801e-08
100627165	ESCO2	establishment of sister chromatid cohesion N-acetyltransferase 2	-1.10326	4.06117e-09	4.5668e-08
100512096	MMD2	monocyte to macrophage differentiation associated 2%2C transcript variant X4	7.40717	4.10722e-09	4.6164e-08
110259912	LOC110259912	uncharacterized LOC110259912%2C transcript variant X1	-2.52631	4.26342e-09	4.78517e-08
110257534	ZNF775	zinc finger protein 775%2C transcript variant X4	-1.58519	4.32117e-09	4.84313e-08
novel.16398	-	PF00501:AMP-binding enzyme	1.17182	4.35148e-09	4.87251e-08
100153004	CNTRL	centriolin%2C transcript variant X2	-1.03699	4.50055e-09	5.02995e-08
novel.8896	-	-	7.1192	4.53807e-09	5.0695e-08
100736797	C1H14orf28	chromosome 1 C14orf28 homolog	1.00475	4.58744e-09	5.11504e-08
100525594	THAP9	THAP domain containing 9%2C transcript variant X6	-1.02574	4.66995e-09	5.20215e-08
novel.11337	-	-	2.52873	4.71148e-09	5.24597e-08
100512825	LMO2	LIM domain only 2%2C transcript variant X2	3.06802	4.73338e-09	5.26787e-08
novel.13922	-	-	2.38205	4.74714e-09	5.28072e-08
100157816	MTUS2	microtubule associated scaffold protein 2%2C transcript variant X4	2.25003	4.77604e-09	5.31039e-08
100518866	CISH	cytokine inducible SH2 containing protein	1.32167	4.819e-09	5.35564e-08
100514555	MTMR8	myotubularin related protein 8%2C transcript variant X4	-1.0759	4.8837e-09	5.42501e-08
novel.10513	-	PF07714:Protein tyrosine kinase|PF12796:Ankyrin repeats (3 copies)	1.22186	5.16619e-09	5.72277e-08
novel.12072	-	PF15300:INTS6/SAGE1/DDX26B/CT45 C-terminus	2.0437	5.19436e-09	5.74862e-08
100174954	KLF11	Kruppel like factor 11	-1.19465	5.19794e-09	5.7499e-08
100153761	CD101	CD101 molecule%2C transcript variant X1	3.30691	5.62023e-09	6.19685e-08
novel.16587	-	-	-1.79105	5.68776e-09	6.26841e-08
102159509	LOC102159509	CMRF35-like molecule 6%2C transcript variant X3	2.18975	5.76767e-09	6.34764e-08
100515125	C2H19orf35	chromosome 2 C19orf35 homolog%2C transcript variant X1	-2.8508	5.84759e-09	6.43262e-08
novel.5689	-	-	-1.96468	5.86613e-09	6.45003e-08
110257029	LOC110257029	uncharacterized LOC110257029	-1.16228	6.18684e-09	6.7807e-08
100514113	SYNDIG1L	synapse differentiation inducing 1 like%2C transcript variant X3	7.27005	6.22103e-09	6.81503e-08
novel.1838	-	-	-1.1876	6.50617e-09	7.12084e-08
100627068	SLC1A2	solute carrier family 1 member 2%2C transcript variant X2	-1.41679	6.65388e-09	7.27246e-08
110262246	LOC110262246	uncharacterized LOC110262246	1.83763	6.68794e-09	7.30633e-08
110255868	ATP11A	ATPase phospholipid transporting 11A%2C transcript variant X8	1.11022	6.79416e-09	7.41896e-08
100513831	PRR15	proline rich 15	-1.34912	6.80657e-09	7.4291e-08
100519442	KCNJ16	potassium voltage-gated channel subfamily J member 16%2C transcript variant X3	-1.55778	6.87948e-09	7.49835e-08
novel.4100	-	-	4.98054	6.96063e-09	7.57638e-08
110256812	LOC110256812	-	4.98054	6.9862e-09	7.59725e-08
novel.5830	-	-	1.11947	7.05546e-09	7.66206e-08
100521401	TMIGD1	transmembrane and immunoglobulin domain containing 1	4.57365	7.06864e-09	7.67286e-08
novel.17751	-	-	4.98132	7.0968e-09	7.69991e-08
102161032	LOC102161032	uncharacterized LOC102161032%2C transcript variant X1	5.18357	7.25594e-09	7.86899e-08
novel.14821	-	PF01302:CAP-Gly domain	1.23028	7.37198e-09	7.99119e-08
100524241	WIZ	widely interspaced zinc finger motifs%2C transcript variant X12	-1.74157	7.57199e-09	8.19306e-08
novel.16762	-	-	3.35435	7.70229e-09	8.33025e-08
novel.5680	-	-	-1.13321	7.73454e-09	8.36132e-08
100462726	BCLAF1	BCL2 associated transcription factor 1%2C transcript variant X5	1.02957	7.74593e-09	8.36982e-08
100135040	SLA-DRA	MHC class II DR-alpha%2C transcript variant X1	1.87795	7.86088e-09	8.49018e-08
102160115	MGAM	maltase-glucoamylase%2C transcript variant X2	2.90568	7.96432e-09	8.59409e-08
100519890	TRIM36	tripartite motif containing 36%2C transcript variant X1	2.48711	7.96924e-09	8.5955e-08
100623166	DCHS1	dachsous cadherin-related 1	1.90248	8.27792e-09	8.90823e-08
novel.11044	-	-	2.95464	8.34695e-09	8.97439e-08
100524447	TBC1D1	TBC1 domain family member 1%2C transcript variant X1	1.032	8.44517e-09	9.07178e-08
106505605	LOC106505605	uncharacterized LOC106505605%2C transcript variant X2	2.79184	8.52168e-09	9.14571e-08
novel.5737	-	PF09294:Interferon-alpha/beta receptor, fibronectin type III|PF01108:Tissue factor	1.34275	8.66935e-09	9.29999e-08
novel.14703	-	-	3.48595	8.7629e-09	9.39187e-08
novel.17202	-	-	3.48313	8.81765e-09	9.43353e-08
110257372	FNDC11	fibronectin type III domain containing 11	3.86163	9.13948e-09	9.76905e-08
100525827	RAB39A	RAB39A%2C member RAS oncogene family%2C transcript variant X1	-1.30808	9.23441e-09	9.86166e-08
novel.8049	-	PF01485:IBR domain, a half RING-finger domain	2.7965	9.67015e-09	1.03131e-07
novel.9927	-	PF00397:WW domain	1.80784	1.01783e-08	1.08453e-07
106507563	LOC106507563	uncharacterized LOC106507563	-2.47129	1.02014e-08	1.08651e-07
100152610	TULP1	tubby like protein 1	2.66405	1.04226e-08	1.10857e-07
novel.4422	-	PF00928:Adaptor complexes medium subunit family	-1.99795	1.05181e-08	1.11773e-07
110255312	LOC110255312	keratin%2C type I cytoskeletal 14	1.61659	1.06343e-08	1.12907e-07
100525111	SPATA21	spermatogenesis associated 21	2.9803	1.06543e-08	1.13069e-07
100628176	STARD9	StAR related lipid transfer domain containing 9	-1.30914	1.06992e-08	1.13495e-07
100153971	ZC2HC1C	zinc finger C2HC-type containing 1C%2C transcript variant X1	-1.88215	1.13205e-08	1.19978e-07
novel.16143	-	PF03131:bZIP Maf transcription factor	1.03571	1.13473e-08	1.20208e-07
100511788	PELO	pelota homolog (Drosophila)	1.43282	1.19449e-08	1.26261e-07
novel.11544	-	-	1.93002	1.19452e-08	1.26261e-07
novel.6514	-	-	2.2141	1.20554e-08	1.2737e-07
novel.978	-	-	4.97543	1.28131e-08	1.35075e-07
novel.1983	-	PF10358:N-terminal C2 in EEIG1 and EHBP1 proteins	1.24337	1.28662e-08	1.35575e-07
novel.16811	-	PF00046:Homeobox domain	1.51724	1.28825e-08	1.35686e-07
100514194	PAF1	PAF1 homolog%2C Paf1/RNA polymerase II complex component%2C transcript variant X2	2.97712	1.30122e-08	1.36991e-07
novel.7912	-	-	2.87469	1.30337e-08	1.37157e-07
100521677	CHML	CHM like%2C Rab escort protein 2	-1.11313	1.32595e-08	1.39348e-07
novel.1810	-	-	-1.32314	1.33014e-08	1.39727e-07
100737771	CDKL2	cyclin dependent kinase like 2%2C transcript variant X2	-1.00181	1.33124e-08	1.39781e-07
novel.14249	-	PF12409:P5-type ATPase cation transporter|PF00702:haloacid dehalogenase-like hydrolase|PF00122:E1-E2 ATPase	1.19731	1.37041e-08	1.43766e-07
110255632	LOC110255632	uncharacterized LOC110255632	2.69399	1.38371e-08	1.44985e-07
novel.13722	-	-	1.40953	1.38386e-08	1.44985e-07
106505308	PCDH9	protocadherin 9%2C transcript variant X5	-1.42593	1.43548e-08	1.50128e-07
novel.12154	-	PF00397:WW domain|PF06220:U1 zinc finger	1.20961	1.4421e-08	1.5073e-07
102166962	HHLA2	HERV-H LTR-associating 2%2C transcript variant X6	2.95982	1.44395e-08	1.50815e-07
novel.180	-	-	3.3834	1.46647e-08	1.531e-07
100516945	EXD1	exonuclease 3'-5' domain containing 1%2C transcript variant X2	-1.66146	1.48273e-08	1.54662e-07
novel.6024	-	PF05091:Eukaryotic translation initiation factor 3 subunit 7 (eIF-3)	1.58519	1.48428e-08	1.54755e-07
110261482	LOC110261482	histone H2A type 1-C	1.91139	1.52047e-08	1.5839e-07
novel.6934	-	-	3.18813	1.56365e-08	1.62603e-07
100515422	MFSD4B	major facilitator superfamily domain containing 4B	-1.27239	1.59115e-08	1.65173e-07
100152868	ACOT6	acyl-CoA thioesterase 6	-2.43466	1.61572e-08	1.67578e-07
novel.14955	-	-	4.99019	1.66984e-08	1.73116e-07
novel.11976	-	PF02205:WH2 motif	1.13818	1.68809e-08	1.74855e-07
100621076	NR1D2	nuclear receptor subfamily 1 group D member 2%2C transcript variant X1	-1.11963	1.72489e-08	1.78434e-07
100124374	CYP26A1	cytochrome P450%2C family 26%2C subfamily A%2C polypeptide 1%2C transcript variant X1	1.82136	1.75207e-08	1.81088e-07
100521822	CEP97	centrosomal protein 97	-1.28993	1.76365e-08	1.82048e-07
novel.9044	-	-	3.10642	1.79177e-08	1.8487e-07
novel.3437	-	-	-1.54787	1.844e-08	1.90011e-07
110259924	LOC110259924	uncharacterized LOC110259924%2C transcript variant X2	1.77136	1.89294e-08	1.94885e-07
novel.4114	-	-	1.65334	1.89918e-08	1.95443e-07
100515615	CCNB1IP1	cyclin B1 interacting protein 1%2C transcript variant X3	1.24701	1.9038e-08	1.95833e-07
106507457	LOC106507457	uncharacterized LOC106507457	2.01171	1.93387e-08	1.9884e-07
novel.6707	-	-	1.95433	1.94435e-08	1.99746e-07
100520594	ZBTB7C	zinc finger and BTB domain containing 7C%2C transcript variant X2	-1.50249	2.29898e-08	2.35464e-07
novel.6347	-	PF12068:Domain of unknown function (DUF3548)|PF00566:Rab-GTPase-TBC domain	2.15549	2.31664e-08	2.37171e-07
100620286	MKX	mohawk homeobox	1.63663	2.33409e-08	2.38752e-07
novel.16265	-	-	4.9698	2.35988e-08	2.41079e-07
novel.15696	-	-	2.51882	2.37225e-08	2.42238e-07
novel.17566	-	PF07281:Insulin-induced protein (INSIG)	-1.13433	2.46698e-08	2.51372e-07
100517914	PLXDC1	plexin domain containing 1%2C transcript variant X1	3.47266	2.47945e-08	2.52534e-07
novel.1806	-	-	-1.76244	2.48356e-08	2.52844e-07
novel.18636	-	-	1.49936	2.52539e-08	2.56883e-07
100513318	RAD1	RAD1 checkpoint DNA exonuclease%2C transcript variant X4	-1.08524	2.57665e-08	2.61649e-07
100511132	BICD1	BICD cargo adaptor 1%2C transcript variant X9	-1.3368	2.58145e-08	2.61913e-07
110256069	DOC2B	double C2 domain beta%2C transcript variant X1	4.89595	2.59556e-08	2.63232e-07
100511545	LOC100511545	uncharacterized LOC100511545%2C transcript variant X2	1.99865	2.66388e-08	2.69586e-07
100520724	OTP	orthopedia homeobox%2C transcript variant X1	2.18535	2.66637e-08	2.69723e-07
100523876	SESN1	sestrin 1%2C transcript variant X1	-1.06509	2.66964e-08	2.69933e-07
novel.10187	-	-	4.22475	2.67071e-08	2.69933e-07
novel.1527	-	PF00490:Delta-aminolevulinic acid dehydratase	-1.88173	2.70217e-08	2.72649e-07
100511937	LOC100511937	phosphatidylinositol 3-kinase regulatory subunit gamma%2C transcript variant X1	-1.02829	2.73881e-08	2.76229e-07
novel.9701	-	-	3.82529	2.78071e-08	2.80217e-07
novel.16335	-	-	1.08954	2.81389e-08	2.8344e-07
novel.11080	-	-	3.48218	2.83046e-08	2.84867e-07
397119	PLCD4	phospholipase C delta 4%2C transcript variant X2	2.52947	2.85007e-08	2.86599e-07
novel.1484	-	PF01597:Glycine cleavage H-protein	-1.88607	2.85355e-08	2.86827e-07
novel.311	-	-	-1.34666	2.87791e-08	2.89031e-07
102166186	LOC102166186	uncharacterized LOC102166186	-6.90095	3.08531e-08	3.09077e-07
novel.17217	-	PF00250:Forkhead domain	5.04183	3.30057e-08	3.29807e-07
novel.5273	-	PF00795:Carbon-nitrogen hydrolase	-1.68936	3.5158e-08	3.50871e-07
novel.18680	-	PF11414:Adenomatous polyposis coli tumour suppressor protein	-1.51392	3.55191e-08	3.54326e-07
novel.3832	-	PF10601:LITAF-like zinc ribbon domain	3.76369	3.5841e-08	3.57238e-07
novel.5607	-	PF00625:Guanylate kinase|PF00595:PDZ domain (Also known as DHR or GLGF)|PF00397:WW domain	1.06622	3.76553e-08	3.74693e-07
102166231	LOC102166231	uncharacterized LOC102166231	2.2121	3.83393e-08	3.8102e-07
novel.3865	-	-	5.00535	3.83795e-08	3.81261e-07
novel.1583	-	PF03098:Animal haem peroxidase	1.87714	3.8663e-08	3.83756e-07
100037284	ITGB8	integrin subunit beta 8%2C transcript variant X3	3.10877	3.94054e-08	3.90636e-07
100515966	GLP2R	glucagon like peptide 2 receptor%2C transcript variant X1	3.82655	3.9944e-08	3.9581e-07
100519885	CHST1	carbohydrate sulfotransferase 1%2C transcript variant X1	1.8997	4.19098e-08	4.14598e-07
novel.11543	-	-	1.79321	4.25074e-08	4.2016e-07
novel.18026	-	-	1.20178	4.42038e-08	4.35841e-07
100622627	NEK10	NIMA related kinase 10%2C transcript variant X4	-1.10804	4.52624e-08	4.45539e-07
100517306	PEX12	peroxisomal biogenesis factor 12	-1.23785	4.55101e-08	4.47792e-07
102159544	KRTCAP3	keratinocyte associated protein 3%2C transcript variant X2	1.50692	4.6459e-08	4.5694e-07
100626842	TAS1R1	taste 1 receptor member 1%2C transcript variant X1	-1.25563	4.68675e-08	4.60767e-07
novel.9703	-	PF00134:Cyclin, N-terminal domain	1.34272	4.76119e-08	4.67506e-07
100155365	DUOXA2	dual oxidase maturation factor 2	-2.50846	4.87121e-08	4.77913e-07
novel.4194	-	-	3.26795	4.88805e-08	4.79368e-07
100625585	IKZF4	IKAROS family zinc finger 4%2C transcript variant X10	1.00807	4.9356e-08	4.83632e-07
novel.17428	-	PF00102:Protein-tyrosine phosphatase	2.25723	5.06731e-08	4.96129e-07
novel.6316	-	-	3.09498	5.15884e-08	5.04053e-07
106509697	CIITA	class II major histocompatibility complex transactivator%2C transcript variant X5	1.91386	5.30603e-08	5.17796e-07
100516921	CFI	complement factor I	1.1292	5.41284e-08	5.27136e-07
novel.7015	-	-	1.1726	5.43512e-08	5.2909e-07
397229	SLC35C1	solute carrier family 35 member C1%2C transcript variant X1	-1.33137	5.4631e-08	5.31596e-07
102162202	LOC102162202	histone H2B type 2-E	1.78951	5.54066e-08	5.38922e-07
100533201	PDCD1	programmed cell death 1%2C transcript variant X1	4.84963	5.87759e-08	5.70527e-07
397509	KITLG	KIT ligand%2C transcript variant X1	1.00884	6.02488e-08	5.84585e-07
novel.3985	-	PF10609:NUBPL iron-transfer P-loop NTPase	1.0542	6.21878e-08	6.0168e-07
102164442	FAM227B	family with sequence similarity 227 member B%2C transcript variant X6	-1.14773	6.23146e-08	6.02416e-07
100517970	EIF5A	eukaryotic translation initiation factor 5A%2C transcript variant X4	1.01718	6.47512e-08	6.24195e-07
100517048	FDXACB1	ferredoxin-fold anticodon binding domain containing 1	-1.06439	6.55215e-08	6.31109e-07
100525125	OMG	oligodendrocyte myelin glycoprotein	2.96817	6.69622e-08	6.44203e-07
100519689	LRP2	LDL receptor related protein 2	-1.23983	6.82366e-08	6.55667e-07
110257763	MAGEE2	MAGE family member E2	-2.064	6.84474e-08	6.57161e-07
novel.18932	-	-	4.81382	6.88748e-08	6.60731e-07
100525271	BCORL1	BCL6 corepressor like 1%2C transcript variant X9	-1.60833	6.93807e-08	6.6478e-07
novel.9030	-	PF15453:Protein incorporated later into Tight Junctions	1.12362	6.98453e-08	6.68962e-07
100515802	LRFN1	leucine rich repeat and fibronectin type III domain containing 1	1.47785	7.01882e-08	6.71975e-07
novel.16037	-	PF12796:Ankyrin repeats (3 copies)|PF13857:Ankyrin repeats (many copies)	2.96249	7.33823e-08	7.01143e-07
396865	CHI3L1	chitinase 3 like 1	-1.30229	7.76462e-08	7.40395e-07
novel.9850	-	PF13855:Leucine rich repeat|PF01462:Leucine rich repeat N-terminal domain|PF00008:EGF-like domain	-1.01637	7.77458e-08	7.41048e-07
novel.7559	-	PF00822:PMP-22/EMP/MP20/Claudin family	-1.02969	7.78443e-08	7.41689e-07
100524085	USP15	ubiquitin specific peptidase 15%2C transcript variant X2	2.53418	8.09121e-08	7.69685e-07
110255634	LOC110255634	uncharacterized LOC110255634	2.71036	8.17084e-08	7.76949e-07
novel.8540	-	PF02373:JmjC domain, hydroxylase|PF02375:jmjN domain	1.22525	8.1803e-08	7.77538e-07
novel.1074	-	-	-1.22707	8.22057e-08	7.81053e-07
novel.15415	-	PF00004:ATPase family associated with various cellular activities (AAA)	1.87159	8.24439e-08	7.83003e-07
100515408	SHPK	sedoheptulokinase	-1.2342	8.31689e-08	7.89573e-07
novel.2790	-	-	4.81485	8.50526e-08	8.07134e-07
novel.2329	-	-	2.45066	8.53469e-08	8.09603e-07
396611	IRF1	interferon regulatory factor 1	1.37353	8.60403e-08	8.1553e-07
100153992	CCDC107	coiled-coil domain containing 107%2C transcript variant X1	-1.02998	8.64651e-08	8.1923e-07
novel.11929	-	PF08155:NOGCT (NUC087) domain|PF06858:Nucleolar GTP-binding protein 1 (NOG1)	1.57333	8.76747e-08	8.29967e-07
574051	LOC574051	histone H1.2-like protein	1.47598	8.77031e-08	8.29967e-07
novel.254	-	-	2.4086	8.80251e-08	8.32683e-07
novel.15761	-	PF01593:Flavin containing amine oxidoreductase	-1.42752	8.80733e-08	8.32808e-07
rna78621	-	tRNA-Glu	-1.74529	8.91602e-08	8.42415e-07
733644	RHCG	Rh family C glycoprotein%2C transcript variant X1	-2.00301	9.20708e-08	8.6819e-07
110259691	LOC110259691	uncharacterized LOC110259691%2C transcript variant X4	1.13961	9.40695e-08	8.86686e-07
100522757	RUBCNL	RUN and cysteine rich domain containing beclin 1 interacting protein like%2C transcript variant X2	-1.87683	9.41585e-08	8.87173e-07
novel.10017	-	PF11176:Translation machinery-associated protein 16	1.41476	9.55347e-08	8.98359e-07
397097	DGKA	diacylglycerol kinase alpha%2C transcript variant X4	1.20686	9.56667e-08	8.98889e-07
100513251	DNAAF4	dynein axonemal assembly factor 4%2C transcript variant X2	-1.45573	9.90702e-08	9.29399e-07
397501	POU2F1	POU class 2 homeobox 1%2C transcript variant X2	-1.03827	1.01396e-07	9.50839e-07
novel.12902	-	-	2.74575	1.02607e-07	9.6144e-07
novel.2170	-	PF00397:WW domain	1.05035	1.03626e-07	9.70227e-07
100037288	SLA-3	MHC class I antigen 3%2C transcript variant X2	2.58993	1.07544e-07	1.00493e-06
novel.934	-	-	2.20094	1.07774e-07	1.00668e-06
novel.7656	-	-	-2.48895	1.10348e-07	1.02911e-06
100516586	TXNDC16	thioredoxin domain containing 16%2C transcript variant X5	-1.47372	1.12727e-07	1.04964e-06
novel.3800	-	PF17229:Region of unknown function (DUF5303)|PF00454:Phosphatidylinositol 3- and 4-kinase|PF15785:Serine/threonine-protein kinase smg-1	3.84304	1.14004e-07	1.06112e-06
100049673	HPS3	HPS3%2C biogenesis of lysosomal organelles complex 2 subunit 1%2C transcript variant X2	-1.47255	1.14432e-07	1.06469e-06
106510480	CHST4	carbohydrate sulfotransferase 4%2C transcript variant X2	3.69358	1.16142e-07	1.07975e-06
102166963	LOC102166963	uncharacterized LOC102166963	-1.95743	1.17159e-07	1.08835e-06
novel.4060	-	-	2.92817	1.1725e-07	1.08877e-06
novel.13484	-	-	1.9775	1.18664e-07	1.10112e-06
novel.18939	-	-	-1.0516	1.2068e-07	1.11888e-06
100518495	ASXL3	additional sex combs like 3%2C transcriptional regulator	1.07692	1.21138e-07	1.12269e-06
100738728	RPRML	reprimo like	3.03406	1.22206e-07	1.13168e-06
100286863	DLX5	distal-less homeobox 5	2.8332	1.22251e-07	1.13168e-06
100739155	MXD4	MAX dimerization protein 4	-1.22974	1.22906e-07	1.1373e-06
novel.15539	-	-	1.97114	1.27242e-07	1.17605e-06
novel.6586	-	-	3.68518	1.35782e-07	1.25206e-06
100523750	SMTNL2	smoothelin like 2%2C transcript variant X3	-1.89699	1.36537e-07	1.25853e-06
100037292	ACKR4	atypical chemokine receptor 4	2.94139	1.4762e-07	1.35701e-06
100739601	CCDC83	coiled-coil domain containing 83%2C transcript variant X1	4.05796	1.49592e-07	1.3727e-06
novel.11764	-	-	4.12923	1.49612e-07	1.3727e-06
novel.17066	-	-	4.05796	1.49616e-07	1.3727e-06
102165434	LOC102165434	uncharacterized LOC102165434	4.88453	1.50815e-07	1.3821e-06
novel.6607	-	-	2.54803	1.53612e-07	1.40665e-06
novel.18734	-	-	6.7841	1.5388e-07	1.40856e-06
100216478	TEAD1	TEA domain transcription factor 1%2C transcript variant X7	1.71053	1.58878e-07	1.45375e-06
novel.9469	-	PF13907:Domain of unknown function (DUF4208)|PF00271:Helicase conserved C-terminal domain	2.2505	1.60304e-07	1.46624e-06
100522670	LOC100522670	zinc finger protein 789-like%2C transcript variant X5	-1.46614	1.6049e-07	1.46737e-06
novel.16026	-	PF00104:Ligand-binding domain of nuclear hormone receptor|PF00105:Zinc finger, C4 type (two domains)	1.15988	1.61497e-07	1.47601e-06
novel.16511	-	-	-2.08446	1.61878e-07	1.47892e-06
novel.10916	-	PF02023:SCAN domain	1.35152	1.63132e-07	1.48923e-06
100739146	TTLL9	tubulin tyrosine ligase like 9	1.86626	1.6493e-07	1.50419e-06
novel.11875	-	PF00595:PDZ domain (Also known as DHR or GLGF)	1.19394	1.65515e-07	1.50868e-06
100517627	DMRTA1	DMRT like family A1	-1.2865	1.67932e-07	1.53012e-06
novel.6588	-	PF00168:C2 domain	1.42458	1.77839e-07	1.61667e-06
102164161	LOC102164161	potassium/sodium hyperpolarization-activated cyclic nucleotide-gated channel 2	-1.39307	1.83751e-07	1.66786e-06
novel.16967	-	-	-1.34332	1.8716e-07	1.69815e-06
novel.10061	-	-	6.78727	1.87768e-07	1.70302e-06
100516775	RAB39B	RAB39B%2C member RAS oncogene family	1.48204	1.90192e-07	1.72369e-06
novel.18032	-	-	6.9222	1.98227e-07	1.79309e-06
novel.16885	-	-	6.92219	1.98556e-07	1.7947e-06
novel.7175	-	PF00010:Helix-loop-helix DNA-binding domain	2.26152	1.99866e-07	1.80586e-06
102164918	SHC3	SHC adaptor protein 3%2C transcript variant X3	-1.03543	2.00261e-07	1.80874e-06
396629	TRAF6	TNF receptor associated factor 6%2C transcript variant X1	1.22608	2.03168e-07	1.83221e-06
100153930	S100A14	S100 calcium binding protein A14	1.57616	2.06531e-07	1.86042e-06
100627428	ZNF182	zinc finger protein 182%2C transcript variant X6	-1.0211	2.07484e-07	1.86829e-06
novel.12186	-	-	4.72128	2.08251e-07	1.8745e-06
102159223	ADAT3	adenosine deaminase%2C tRNA specific 3	-1.1064	2.08569e-07	1.87665e-06
novel.4236	-	-	-2.31617	2.12311e-07	1.90743e-06
novel.16425	-	-	1.51355	2.13009e-07	1.91298e-06
novel.11617	-	-	2.53439	2.13773e-07	1.91912e-06
novel.12669	-	-	-2.32028	2.17006e-07	1.94593e-06
novel.18109	-	PF09069:EF-hand|PF00569:Zinc finger, ZZ type|PF00435:Spectrin repeat|PF09068:EF hand|PF00397:WW domain|PF00307:Calponin homology (CH) domain	1.6471	2.25264e-07	2.01618e-06
100516683	ABHD18	abhydrolase domain containing 18	-1.27571	2.26686e-07	2.02814e-06
novel.1858	-	PF02218:Repeat in HS1/Cortactin	1.31393	2.26983e-07	2.02928e-06
novel.9188	-	-	1.9731	2.31973e-07	2.07077e-06
novel.16060	-	-	2.33634	2.32527e-07	2.07416e-06
100153460	AKAP5	A-kinase anchoring protein 5%2C transcript variant X2	-1.59984	2.34975e-07	2.09285e-06
novel.13306	-	PF02902:Ulp1 protease family, C-terminal catalytic domain	1.14385	2.45862e-07	2.18409e-06
novel.8051	-	-	2.74514	2.49974e-07	2.21806e-06
novel.9758	-	-	-2.30685	2.50059e-07	2.21806e-06
novel.1039	-	-	4.72236	2.52302e-07	2.23712e-06
100518008	M1AP	meiosis 1 associated protein%2C transcript variant X1	2.64993	2.55233e-07	2.26142e-06
102167195	RTL5	retrotransposon Gag like 5	-1.39305	2.56039e-07	2.26772e-06
novel.16541	-	-	4.79848	2.57596e-07	2.27981e-06
100515395	PITX2	paired like homeodomain 2%2C transcript variant X3	-1.20704	2.63307e-07	2.32689e-06
novel.9884	-	-	3.26731	2.63608e-07	2.32868e-06
100154624	CLCA4	calcium-activated chloride channel regulator 4	2.42889	2.64782e-07	2.33818e-06
novel.10731	-	-	1.35944	2.65213e-07	2.34025e-06
novel.374	-	PF08241:Methyltransferase domain	-1.12771	2.6787e-07	2.36107e-06
novel.7701	-	-	-1.33958	2.73127e-07	2.40651e-06
110258051	LOC110258051	-	1.25938	2.77149e-07	2.43833e-06
100156373	VIL1	villin 1	1.24351	2.77304e-07	2.4388e-06
110257837	LOC110257837	uncharacterized LOC110257837	2.03983	2.79367e-07	2.45512e-06
novel.15661	-	-	6.79131	2.8541e-07	2.5036e-06
novel.9525	-	-	2.41671	2.87203e-07	2.5184e-06
100523849	C6H1orf87	chromosome 6 C1orf87 homolog	4.82692	2.88623e-07	2.52992e-06
106510251	LOC106510251	uncharacterized LOC106510251	3.7016	2.8993e-07	2.54044e-06
novel.12599	-	-	6.72639	2.91202e-07	2.55064e-06
novel.9966	-	-	6.72639	2.91494e-07	2.55226e-06
novel.3765	-	PF04801:Sin-like protein conserved region	1.06797	2.92048e-07	2.55617e-06
100512832	TTC27	tetratricopeptide repeat domain 27	-1.03211	2.96192e-07	2.58958e-06
100153332	OXR1	oxidation resistance 1%2C transcript variant X4	2.89811	2.97193e-07	2.59738e-06
novel.800	-	-	-1.06765	2.9855e-07	2.60828e-06
novel.6076	-	-	1.3986	3.01774e-07	2.63451e-06
novel.2947	-	-	-1.49106	3.0388e-07	2.65095e-06
novel.18602	-	-	2.57571	3.08281e-07	2.68836e-06
novel.5754	-	-	2.1227	3.09668e-07	2.69946e-06
100513637	GANC	glucosidase alpha%2C neutral C%2C transcript variant X9	-1.22377	3.11479e-07	2.71326e-06
445002	FST	follistatin	1.70244	3.15436e-07	2.74572e-06
100511579	KIAA1614	KIAA1614 ortholog	2.2454	3.18282e-07	2.76947e-06
novel.3671	-	-	4.01801	3.19933e-07	2.78181e-06
100512158	MSH3	mutS homolog 3	-1.12635	3.2243e-07	2.80249e-06
100512412	APOBEC1	apolipoprotein B mRNA editing enzyme catalytic subunit 1%2C transcript variant X2	3.52269	3.37269e-07	2.92825e-06
novel.11562	-	-	3.04369	3.52529e-07	3.05739e-06
novel.18337	-	-	3.68185	3.56108e-07	3.08618e-06
448855	ISG20	interferon stimulated exonuclease gene 20%2C transcript variant X3	2.76056	3.57494e-07	3.09706e-06
novel.13813	-	PF00412:LIM domain|PF06297:PET Domain	1.88077	3.64672e-07	3.15695e-06
100518732	ARHGAP9	Rho GTPase activating protein 9%2C transcript variant X3	1.53885	3.69034e-07	3.19355e-06
novel.1315	-	-	4.67232	3.71641e-07	3.21493e-06
novel.5305	-	-	6.72292	3.75662e-07	3.24736e-06
novel.9660	-	-	6.72292	3.76438e-07	3.25289e-06
102165146	LOC102165146	uncharacterized LOC102165146	-1.0286	3.79945e-07	3.2808e-06
novel.15181	-	-	7.01961	3.85785e-07	3.32881e-06
445517	RNH1	ribonuclease/angiogenin inhibitor 1%2C transcript variant X4	1.22133	3.86225e-07	3.3314e-06
novel.7755	-	-	5.12887	3.868e-07	3.33515e-06
100738137	ANO1	anoctamin 1%2C transcript variant X8	1.31499	3.94855e-07	3.40091e-06
100152747	TBX18	T-box 18	1.74126	3.99845e-07	3.44014e-06
novel.15570	-	PF14913:DPCD protein family	2.02237	4.01395e-07	3.45223e-06
novel.16232	-	-	4.66855	4.09042e-07	3.51164e-06
novel.11250	-	-	4.02111	4.31255e-07	3.69701e-06
novel.15431	-	PF13424:Tetratricopeptide repeat	6.77241	4.35442e-07	3.73156e-06
novel.4922	-	-	1.19541	4.3974e-07	3.76567e-06
novel.18566	-	-	-1.08519	4.42855e-07	3.79098e-06
100625893	LRRC34	leucine rich repeat containing 34%2C transcript variant X2	1.91781	4.43086e-07	3.79159e-06
100517307	SLC6A4	solute carrier family 6 member 4%2C transcript variant X2	1.76388	4.43511e-07	3.79386e-06
100152565	GFRA1	GDNF family receptor alpha 1%2C transcript variant X6	-1.26153	4.56529e-07	3.90241e-06
106505712	LOC106505712	uncharacterized LOC106505712	3.01124	4.64619e-07	3.96871e-06
novel.3721	-	-	2.19662	4.74079e-07	4.04226e-06
100626771	MPP4	membrane palmitoylated protein 4%2C transcript variant X1	2.18013	4.7553e-07	4.05317e-06
novel.14312	-	-	1.72335	4.91569e-07	4.18388e-06
100517760	PTPN22	protein tyrosine phosphatase%2C non-receptor type 22%2C transcript variant X1	-1.12121	4.93216e-07	4.1964e-06
novel.15552	-	-	1.10096	4.95946e-07	4.2166e-06
novel.10577	-	PF00621:RhoGEF domain	-1.07543	5.00686e-07	4.25386e-06
novel.17061	-	-	4.6754	5.03912e-07	4.27821e-06
novel.14309	-	-	6.9152	5.08877e-07	4.31574e-06
novel.4675	-	-	6.79659	5.09372e-07	4.3184e-06
novel.18639	-	-	6.7966	5.10652e-07	4.3277e-06
100522178	LOC100522178	olfactory receptor 1J4-like	2.5258	5.16757e-07	4.37789e-06
novel.13108	-	-	3.13388	5.23836e-07	4.43628e-06
100302020	CLDN6	claudin 6%2C transcript variant X1	2.0408	5.30718e-07	4.49136e-06
100738764	2019-03-01	membrane associated ring-CH-type finger 1%2C transcript variant X3	2.64538	5.31705e-07	4.49651e-06
396701	RNASE10	ribonuclease A family member 10 (inactive)%2C transcript variant X1	-3.24339	5.32944e-07	4.50539e-06
novel.12451	-	PF00627:UBA/TS-N domain|PF10427:Argonaute hook|PF12938:M domain of GW182|PF16608:TNRC6-PABC binding domain	1.74515	5.37854e-07	4.54366e-06
novel.12699	-	-	3.58284	5.40516e-07	4.56291e-06
novel.2250	-	PF05843:Suppressor of forked protein (Suf)	1.90426	5.47015e-07	4.61449e-06
novel.2761	-	PF08333:Protein of unknown function (DUF1725)	-1.70143	5.66945e-07	4.77584e-06
novel.18706	-	-	1.02179	5.6884e-07	4.78671e-06
106510138	LOC106510138	uncharacterized LOC106510138	-2.32558	5.73755e-07	4.82466e-06
novel.5650	-	-	1.78581	5.78819e-07	4.86533e-06
100152774	ZNF644	zinc finger protein 644%2C transcript variant X4	1.62879	6.04536e-07	5.06915e-06
novel.3594	-	-	4.62237	6.07566e-07	5.09276e-06
808502	ND2	-	-1.46518	6.10794e-07	5.11801e-06
100512998	MYO1G	myosin IG%2C transcript variant X1	1.79067	6.12207e-07	5.12804e-06
novel.3367	-	PF07738:Sad1 / UNC-like C-terminal|PF09387:Mitochondrial RNA binding protein MRP	1.09038	6.15834e-07	5.1566e-06
396844	NPPB	natriuretic peptide B	4.73266	6.50359e-07	5.42659e-06
novel.13042	-	PF13920:Zinc finger, C3HC4 type (RING finger)	3.54714	6.50942e-07	5.42954e-06
110255584	LOC110255584	uncharacterized LOC110255584	1.12042	6.56163e-07	5.46925e-06
novel.16455	-	PF02213:GYF domain	1.02444	6.65299e-07	5.53764e-06
novel.10201	-	-	6.73798	6.70606e-07	5.57986e-06
100271881	LY6G6F	lymphocyte antigen 6 family member G6F%2C transcript variant X1	3.57931	6.77061e-07	5.62963e-06
102163932	SAMD11	sterile alpha motif domain containing 11%2C transcript variant X2	1.67829	6.86114e-07	5.69693e-06
novel.18112	-	-	3.57018	6.91843e-07	5.73848e-06
novel.3253	-	-	2.1861	7.38179e-07	6.11428e-06
novel.5456	-	-	2.32313	7.42606e-07	6.14881e-06
novel.14099	-	-	2.28589	7.43259e-07	6.15207e-06
100154856	B4GALT3	beta-1%2C4-galactosyltransferase 3%2C transcript variant X2	1.93457	7.46932e-07	6.17818e-06
102167519	HERC4	HECT and RLD domain containing E3 ubiquitin protein ligase 4%2C transcript variant X8	1.2813	7.49236e-07	6.19507e-06
novel.18458	-	PF00178:Ets-domain	1.47491	7.53984e-07	6.23217e-06
100627466	LOC100627466	uncharacterized LOC100627466	-2.07014	7.60978e-07	6.28342e-06
396621	TLR6	toll like receptor 6	-2.26962	7.6981e-07	6.34973e-06
novel.7759	-	-	1.71429	7.72275e-07	6.36785e-06
novel.813	-	-	1.80505	7.83119e-07	6.45056e-06
100151860	TRUB1	TruB pseudouridine synthase family member 1%2C transcript variant X5	-1.44323	8.30073e-07	6.82313e-06
novel.14584	-	-	1.59074	8.36721e-07	6.87302e-06
novel.13857	-	-	-1.45727	8.38623e-07	6.88627e-06
novel.5176	-	PF10377:Autophagy-related protein 11	1.09055	8.44141e-07	6.92919e-06
110260669	LOC110260669	uncharacterized LOC110260669	-1.73319	8.59138e-07	7.04742e-06
novel.8818	-	PF00270:DEAD/DEAH box helicase	1.8276	8.87722e-07	7.25472e-06
100518302	LITAF	lipopolysaccharide induced TNF factor%2C transcript variant X1	2.65377	8.9991e-07	7.3489e-06
100524283	SLC25A12	solute carrier family 25 member 12%2C transcript variant X1	1.8854	9.19086e-07	7.49413e-06
102161281	IZUMO1R	IZUMO1 receptor%2C JUNO	4.82806	9.1927e-07	7.49413e-06
novel.3151	-	-	2.64529	9.36629e-07	7.62521e-06
novel.4098	-	-	1.7247	9.36631e-07	7.62521e-06
106504870	LOC106504870	-	2.38737	9.60501e-07	7.80883e-06
novel.13109	-	PF00071:Ras family	1.4881	9.70101e-07	7.88419e-06
100624483	NEIL2	nei like DNA glycosylase 2	-1.42589	9.78272e-07	7.94244e-06
novel.18201	-	-	1.56473	9.83759e-07	7.98155e-06
novel.9274	-	-	3.43094	9.86143e-07	7.99543e-06
102165822	LOC102165822	uncharacterized LOC102165822	1.52222	1.01612e-06	8.23284e-06
100739505	GPBAR1	G protein-coupled bile acid receptor 1%2C transcript variant X1	3.42387	1.03454e-06	8.37923e-06
novel.10636	-	-	1.5463	1.03509e-06	8.38086e-06
100513692	TRPM8	transient receptor potential cation channel subfamily M member 8	1.83611	1.04772e-06	8.47154e-06
novel.7869	-	-	4.66077	1.05279e-06	8.50674e-06
novel.16750	-	-	4.62935	1.07819e-06	8.70606e-06
novel.16075	-	PF01762:Galactosyltransferase	1.31082	1.07939e-06	8.71285e-06
novel.9242	-	-	2.92037	1.08738e-06	8.77436e-06
novel.264	-	PF00429:ENV polyprotein (coat polyprotein)	-1.79028	1.0885e-06	8.78038e-06
100521083	RMDN2	regulator of microtubule dynamics 2%2C transcript variant X6	-1.05125	1.09088e-06	8.79663e-06
novel.4758	-	PF00681:Plectin repeat	1.56102	1.10711e-06	8.91536e-06
110256730	LOC110256730	uncharacterized LOC110256730%2C transcript variant X3	2.26	1.11352e-06	8.96397e-06
novel.10705	-	-	6.71235	1.14913e-06	9.23068e-06
100620827	LOC100620827	uncharacterized LOC100620827%2C transcript variant X2	3.0325	1.14937e-06	9.23068e-06
100156448	CASQ1	calsequestrin 1%2C transcript variant X1	2.1932	1.15772e-06	9.29456e-06
novel.15012	-	PF01291:LIF / OSM family	1.30263	1.2077e-06	9.6724e-06
102157617	LOC102157617	uncharacterized LOC102157617%2C transcript variant X2	-1.19568	1.22252e-06	9.78506e-06
novel.16342	-	-	2.39146	1.22442e-06	9.79704e-06
100511507	ITGA10	integrin subunit alpha 10%2C transcript variant X1	1.21149	1.22496e-06	9.79801e-06
102159502	LOC102159502	uncharacterized LOC102159502	-1.2308	1.24111e-06	9.92385e-06
novel.8257	-	-	3.3551	1.25241e-06	1.00075e-05
novel.16930	-	-	1.57203	1.26258e-06	1.0082e-05
110255411	LOC110255411	uncharacterized LOC110255411	2.42101	1.27413e-06	1.01674e-05
novel.5132	-	-	6.74422	1.27681e-06	1.01819e-05
110255776	LOC110255776	-	3.8784	1.2813e-06	1.02143e-05
100155151	CRABP2	cellular retinoic acid binding protein 2	2.05097	1.28298e-06	1.02233e-05
novel.13129	-	PF00075:RNase H	-3.08737	1.28329e-06	1.02233e-05
100524238	TSG101	tumor susceptibility 101	1.38867	1.29092e-06	1.02807e-05
100523303	SHD	Src homology 2 domain containing transforming protein D	2.42516	1.29502e-06	1.03099e-05
110256062	LOC110256062	uncharacterized LOC110256062	2.23045	1.3028e-06	1.03649e-05
novel.3535	-	PF01217:Clathrin adaptor complex small chain	2.52592	1.32156e-06	1.05035e-05
110256603	LOC110256603	uncharacterized LOC110256603	1.16616	1.34667e-06	1.06853e-05
novel.1486	-	-	6.61422	1.35158e-06	1.07028e-05
100521229	LOC100521229	intestinal-type alkaline phosphatase-like	6.61422	1.35429e-06	1.07207e-05
novel.6653	-	PF13891:Potential DNA-binding domain	1.98796	1.40089e-06	1.10674e-05
110255985	LOC110255985	uncharacterized LOC110255985	2.70456	1.44572e-06	1.14034e-05
100513190	ASB15	ankyrin repeat and SOCS box containing 15%2C transcript variant X6	-2.05848	1.44581e-06	1.14034e-05
100515652	ARHGEF28	Rho guanine nucleotide exchange factor 28%2C transcript variant X3	2.15796	1.47225e-06	1.16004e-05
novel.12805	-	PF10197:N-terminal domain of CBF1 interacting co-repressor CIR|PF12542:Pre-mRNA splicing factor	1.27853	1.49765e-06	1.17966e-05
novel.12439	-	-	-4.23791	1.50641e-06	1.18577e-05
novel.11064	-	-	6.65628	1.55726e-06	1.22458e-05
novel.11019	-	-	6.65628	1.55973e-06	1.22612e-05
100627008	DMPK	dystrophia myotonica protein kinase%2C transcript variant X11	1.65821	1.61609e-06	1.26791e-05
novel.7119	-	-	2.73162	1.61668e-06	1.26796e-05
rna78620	-	tRNA-Leu	-1.87069	1.63196e-06	1.27867e-05
novel.9541	-	-	1.06606	1.66149e-06	1.3001e-05
110257420	LOC110257420	cytochrome c oxidase subunit 4 isoform 2%2C mitochondrial%2C transcript variant X3	3.02834	1.72625e-06	1.34811e-05
novel.10356	-	-	2.54457	1.73093e-06	1.35132e-05
100156278	ALDH1B1	aldehyde dehydrogenase 1 family member B1	-1.17355	1.78007e-06	1.3874e-05
novel.1203	-	PF08324:PUL domain	1.19036	1.78141e-06	1.388e-05
novel.4993	-	-	3.88313	1.80917e-06	1.4087e-05
100517656	CAPN12	calpain 12%2C transcript variant X2	1.09076	1.81638e-06	1.41385e-05
novel.14818	-	-	1.19215	1.82848e-06	1.4228e-05
novel.874	-	-	-1.37821	1.83604e-06	1.42822e-05
novel.10056	-	-	6.54494	1.84642e-06	1.43582e-05
106508014	IMPG2	interphotoreceptor matrix proteoglycan 2%2C transcript variant X4	1.67229	1.87937e-06	1.45906e-05
novel.17505	-	PF07648:Kazal-type serine protease inhibitor domain|PF03137:Organic Anion Transporter Polypeptide (OATP) family	1.4991	1.89892e-06	1.47279e-05
100620437	SP4	Sp4 transcription factor%2C transcript variant X1	-1.2857	1.92885e-06	1.49357e-05
102161391	LOC102161391	uncharacterized LOC102161391%2C transcript variant X2	2.98611	1.94778e-06	1.50725e-05
novel.18629	-	-	3.91445	1.95077e-06	1.5076e-05
novel.8813	-	PF07654:Immunoglobulin C1-set domain	1.13535	1.98168e-06	1.53099e-05
100514961	GLT8D2	glycosyltransferase 8 domain containing 2%2C transcript variant X5	-1.1492	1.99212e-06	1.53855e-05
novel.3642	-	-	4.65197	2.04626e-06	1.5773e-05
100524361	QRFP	pyroglutamylated RFamide peptide	2.99871	2.05269e-06	1.58174e-05
novel.16983	-	PF02275:Linear amide C-N hydrolases, choloylglycine hydrolase family|PF15508:beta subunit of N-acylethanolamine-hydrolyzing acid amidase	1.83948	2.05897e-06	1.58555e-05
100513981	SYT17	synaptotagmin 17%2C transcript variant X1	2.39405	2.09892e-06	1.61566e-05
novel.14425	-	PF14670:Coagulation Factor Xa inhibitory site|PF00008:EGF-like domain|PF07645:Calcium-binding EGF domain|PF00594:Vitamin K-dependent carboxylation/gamma-carboxyglutamic (GLA) domain	-1.02469	2.09943e-06	1.61566e-05
novel.19008	-	-	-1.67176	2.10374e-06	1.61793e-05
novel.14813	-	PF01253:Translation initiation factor SUI1	1.42175	2.12051e-06	1.62924e-05
110256580	LOC110256580	uncharacterized LOC110256580	6.54119	2.12902e-06	1.63473e-05
110255435	LOC110255435	uncharacterized LOC110255435	2.10855	2.18367e-06	1.6729e-05
110259969	ITPRIPL1	inositol 1%2C4%2C5-trisphosphate receptor interacting protein-like 1%2C transcript variant X3	-1.2158	2.19024e-06	1.6774e-05
110257627	LOC110257627	uncharacterized LOC110257627	2.00121	2.21187e-06	1.69341e-05
102167611	IGFN1	immunoglobulin-like and fibronectin type III domain containing 1%2C transcript variant X3	-1.31123	2.22716e-06	1.70457e-05
100154659	SPTB	spectrin beta%2C erythrocytic%2C transcript variant X1	2.25808	2.29133e-06	1.75143e-05
novel.11026	-	-	4.86644	2.33552e-06	1.78304e-05
novel.12970	-	-	2.7433	2.34805e-06	1.79191e-05
novel.4259	-	-	3.91643	2.35176e-06	1.79416e-05
novel.14979	-	PF02121:Phosphatidylinositol transfer protein	1.10934	2.37623e-06	1.81225e-05
novel.11023	-	-	1.15162	2.3962e-06	1.82572e-05
110260021	LOC110260021	uncharacterized LOC110260021	-6.58623	2.44614e-06	1.86198e-05
novel.7324	-	-	1.28791	2.45672e-06	1.86944e-05
100158209	PI15	peptidase inhibitor 15	-2.41717	2.46641e-06	1.87621e-05
novel.11955	-	-	1.05258	2.56651e-06	1.94958e-05
110262186	LOC110262186	uncharacterized LOC110262186	2.1165	2.56696e-06	1.94958e-05
novel.1189	-	-	3.4019	2.57879e-06	1.95669e-05
100518325	ADAMTS15	ADAM metallopeptidase with thrombospondin type 1 motif 15	-1.06684	2.61614e-06	1.98439e-05
396859	NOS2	nitric oxide synthase 2%2C transcript variant X3	2.2813	2.63312e-06	1.99536e-05
novel.14797	-	PF00856:SET domain	1.36863	2.642e-06	2.00146e-05
novel.8007	-	-	-1.11178	2.70813e-06	2.04698e-05
100154460	PRTG	protogenin%2C transcript variant X1	3.83306	2.80254e-06	2.11364e-05
novel.9523	-	PF00435:Spectrin repeat|PF08726:Ca2+ insensitive EF hand	1.40856	2.90887e-06	2.18967e-05
100286859	NRP1	neuropilin 1%2C transcript variant X5	-1.23421	2.96221e-06	2.227e-05
novel.11635	-	-	2.23172	2.98841e-06	2.24598e-05
100512949	WNT9A	Wnt family member 9A	1.63984	2.99765e-06	2.25222e-05
100620243	PLXNA4	plexin A4%2C transcript variant X5	1.32889	3.09608e-06	2.32323e-05
novel.10647	-	-	1.89825	3.21141e-06	2.40446e-05
100523107	LOC100523107	melanoma-associated antigen D4%2C transcript variant X2	-1.00761	3.23954e-06	2.42247e-05
106509907	LOC106509907	uncharacterized LOC106509907%2C transcript variant X7	-2.36434	3.24191e-06	2.42348e-05
397164	OPN1SW	opsin 1%2C short wave sensitive	4.45666	3.26411e-06	2.43778e-05
100156361	RUSC1	RUN and SH3 domain containing 1%2C transcript variant X1	1.64582	3.28912e-06	2.45568e-05
novel.2132	-	PF00804:Syntaxin|PF05739:SNARE domain	1.1399	3.29431e-06	2.45878e-05
397140	OVGP1	oviductal glycoprotein 1	2.12975	3.30676e-06	2.46731e-05
397387	THRA	thyroid hormone receptor%2C alpha%2C transcript variant X1	-1.16803	3.33202e-06	2.48459e-05
100523472	DUSP19	dual specificity phosphatase 19%2C transcript variant X1	-1.15922	3.33716e-06	2.48687e-05
novel.1047	-	-	1.11048	3.37018e-06	2.51068e-05
100513010	FOXRED2	FAD dependent oxidoreductase domain containing 2%2C transcript variant X1	1.2166	3.37863e-06	2.51619e-05
100524827	EVI2B	ecotropic viral integration site 2B%2C transcript variant X1	2.17188	3.40346e-06	2.53088e-05
100157211	LYZ	lysozyme	-1.6565	3.41627e-06	2.53945e-05
100521972	LOC100521972	zinc finger protein 546%2C transcript variant X2	-1.27965	3.45801e-06	2.56807e-05
novel.3834	-	-	6.81968	3.48353e-06	2.5854e-05
100627222	LOC100627222	zinc finger protein 596%2C transcript variant X12	3.90941	3.49425e-06	2.59255e-05
100157017	LOC100157017	glyoxylate/hydroxypyruvate reductase B%2C transcript variant X1	-1.20535	3.51671e-06	2.60759e-05
novel.15426	-	PF13414:TPR repeat	3.14305	3.52574e-06	2.61287e-05
100622071	ERCC6L	ERCC excision repair 6 like%2C spindle assembly checkpoint helicase	-1.00758	3.57763e-06	2.64698e-05
595126	LY75	lymphocyte antigen 75	1.48616	3.59923e-06	2.66213e-05
[truncated: 1,763 more rows]
